1 **The scientific chaos phase of the Great Pandemic:**  
2 **A longitudinal analysis and systematic review of the first surge of**  
3 **clinical research concerning COVID-19**

4 Till Adami<sup>1,2\*</sup>, Markus Ries<sup>1</sup> (ORCID: 0000-0002-5054-5741)

5

6 <sup>1</sup> Pediatric Neurology and Metabolic Medicine, Center for Pediatrics and Adolescent  
7 Medicine, University Hospital Heidelberg, Heidelberg, Germany

8 <sup>2</sup> Thoracic Oncology, Thoraxklinik Heidelberg, University Hospital Heidelberg, Heidelberg,  
9 Germany

10

11 \*Corresponding author

12 E-mail: [till.adami@med.uni-heidelberg.de](mailto:till.adami@med.uni-heidelberg.de) (TA)

13

14

## 15 **Abstract**

## 16 **Background**

17 Early stages of catastrophes like COVID-19 are often led by chaos and panic. To characterize the  
18 initial chaos phase of clinical research in such situations, we analyzed the first surge of more than  
19 1000 clinical trials about the new disease at baseline and after two years follow-up. Our 3 main  
20 objectives were: (1) Assessment of spatial and temporal evolution of clinical research of COVID-19  
21 across the globe, (2) Assessment of transparency and quality - trial registration, (3) Assessment of  
22 research waste and redundancies.

## 23 **Methods**

24 By entering the keyword “COVID-19” we screened the International Clinical Trials Registry Platform  
25 of the WHO and downloaded the search output when our goal of 1000 trials was reached on the 1<sup>st</sup> of  
26 April. Additionally, we verified the integrity of the downloaded data from the meta registry by  
27 comparing the data with each individual registration record on their source register. Also, we  
28 conducted a follow-up after two years to track their progress.

## 29 **Results**

30 (1) The spatial evolution followed the geographical spread of the disease as expected, however, the  
31 temporal development suggested that panic was the main driver for clinical research activities. (2)  
32 Trial registrations and registers showed a huge lack of transparency by allowing retrospective  
33 registrations and not keeping their registration records up to date. Quality of trial registration seems to  
34 have improved over the last decade, yet crucial information still was missing. (3) Research waste and  
35 redundancies were present as suggested by discontinuation of trials, preventable flaws in study design,  
36 and similar but uncoordinated research topics operationally fragmented in isolated silo-structures.

## 37 **Conclusion**

38 The scientific response mechanism across the globe was intact during the chaos phase. However,  
39 supervision, leadership, and accountability are urgently needed to prevent research waste, to ensure

40 effective structure, quality, and validity to ultimately break the “panic-then-forget” cycle in future  
41 catastrophes.

42

## 43 **Introduction**

44 In December 2019 a new respiratory disease of unknown cause was detected in Wuhan City, Hubei  
45 Province, China. A novel coronavirus, the severe acute respiratory syndrome coronavirus-2 (SARS-  
46 CoV-2), was identified as the cause of this unexpected outbreak. Due to its vast spread and global  
47 impact, the WHO declared this outbreak “a public health emergency of international concern” as early  
48 as of the 30<sup>th</sup> of January 2020, more than a month prior to being officially declared a pandemic on  
49 March 11, 2020.(1, 2)

50 The COVID-19 pandemic was a rapidly evolving situation, as was the scientific response: so far, the  
51 WHO registered 15834 trials on their clinical trials registry platform related to COVID-19 (accessed  
52 on 29<sup>th</sup> of June 2023).(3, 4) The vast amount of emerging clinical research suggested that the scientific  
53 response mechanism across the globe was intact. Nevertheless, analogue to other catastrophic events  
54 such as mass casualty incidents (MCI), “chaos in catastrophic events impedes decision making and  
55 therefore hinders the scientific progress and thus effective treatment of patients.”(5) To surmount the  
56 initial chaos phase and to create order, appropriate response process structures are needed. In the  
57 scientific world of clinical research, defective process structure is often displayed by poorly designed  
58 studies, information overload and redundancies resulting in unnecessary costs and effort. Insufficient  
59 communication and non-transparency between researchers and institutions regarding planned,  
60 ongoing, and finished research is also a hindrance.(6)

61 Trial registration is a tool which is intended to help the public and scientific world by transparently  
62 displaying trial information and securing quality and validity. By minimizing publication,  
63 reproducibility and selective reporting bias, the value of research and publications is meant to be  
64 improved.(7)

65 In analogy to the chaos phase in the first minutes of an MCI, we examined the “scientific chaos phase”  
66 of such a new pandemic situation by analyzing and reviewing the registration records of the first 1000  
67 trials related to COVID-19 to detect possible flaws and opportunities for improvement in the future.

68

69 To assess lessons-learned, we developed the following 3 main objectives:

70

| <i>Main objectives</i>                                                                                           | Questions                                                                                                                 | Instruments                                                                                                                                                                   | Hypothesis                                                                                                                                                                                                                                                                                                           |
|------------------------------------------------------------------------------------------------------------------|---------------------------------------------------------------------------------------------------------------------------|-------------------------------------------------------------------------------------------------------------------------------------------------------------------------------|----------------------------------------------------------------------------------------------------------------------------------------------------------------------------------------------------------------------------------------------------------------------------------------------------------------------|
| <b><i>(1) Assessment of Spatial and Temporal Evolution of Clinical Research of COVID-19 across the globe</i></b> | How was the geographical and temporal development of clinical research?                                                   | WHO trial registration data (date of registration, origin country), ECDC confirmed cases, UN population estimations                                                           | In the absence of a coordinating body, research follows the spread of the disease out of pragmatism, sense of urgency and panic                                                                                                                                                                                      |
| <b><i>(2) Assessment of Transparency and Quality - Trial Registration</i></b>                                    | Is the data for each trial record transparent, accurate and up to date? How is the overall quality of trial registration? | Data from registration records of each trial, publication search on several platforms, WHO trial registration data set and main criteria from WHO primary registry guidelines | While it is extensively used in expert communities it is possible that there is little awareness, training, and rare usage of trial registries among a broad spectrum of health care professionals, therefore we hypothesized that there is a lack of tools for scientists to enable collaboration and communication |
| <b><i>(3) Assessment of research waste and redundancies</i></b>                                                  | Are there any signs of research waste and redundancies in the overall pattern of                                          | Analysis of study design, different therapeutic agents being tested,                                                                                                          | A surge like this is susceptible for poorly designed studies and similar study                                                                                                                                                                                                                                       |

|                  |                                               |                                                                                                                                                                |
|------------------|-----------------------------------------------|----------------------------------------------------------------------------------------------------------------------------------------------------------------|
| clinical trials? | discontinuation of trials with stated reasons | objectives resulting in a waste of resources and unnecessary exposure to clinical research because of a lack of central coordination and therefore supervision |
|------------------|-----------------------------------------------|----------------------------------------------------------------------------------------------------------------------------------------------------------------|

71

72

## 73 **Materials and methods**

74 This study was designed as a systematic review of the first 1000 clinical trial registration records  
75 registered in the WHO Registry Network related to COVID-19 to depict the scientific chaos phase of  
76 the pandemic. We followed the “Preferred Reporting Items for Systematic Reviews and Meta-  
77 Analyses” (PRISMA) guideline for reporting this study and included the checklist (S1 Supporting  
78 information). This review was not registered.

79

## 80 **Data sources and eligibility**

81 The World Health Organizations International Clinical Trials Registry Platform (WHO ICTRP) is a  
82 registry network (“meta-registry”) which gathers registration records from primary and partner  
83 registries and other data providers like ClinicalTrials.gov which meet the WHO registry criteria and  
84 the WHO Trial Registry Data Set (TRDS). (8-10)

85 To analyze the first surge of clinical research and cover the “scientific chaos phase” we decided to take  
86 a convenience sample of the first 1000 registered trials on the WHO ICTRP related to COVID-19. By  
87 entering the keyword “COVID-19” without any filters into the search portal of the WHO ICTRP  
88 (URL: <https://apps.who.int/trialsearch/>) we checked the number of registered trials on a regular basis.

89 The goal of 1000 trials was reached on the 1<sup>st</sup> of April 2020. The search output was downloaded on the  
90 22<sup>nd</sup> of April 2020 at 12:57:03 CET as a CVS-file and imported into Microsoft Excel with a total of  
91 1528 eligible trials. The data used in this study is publicly accessible.

92

## 93 **Data extraction**

94 The downloaded data set consists of the following 22 items for each trial: Trial ID, Public and  
95 Scientific Title, Primary Sponsor, Date of Registration, Source Register, Recruitment Status, Inclusion  
96 Age minimum and maximum, Inclusion Gender, Date of First Enrolment, Target Size, Study Type,  
97 Study Design, Phase, Countries, Contact Information, Inclusion and Exclusion Criteria, (studied)  
98 Health Condition, Intervention, Primary Outcome. The ICTRP also provides a hyperlink for each trial

99 which leads to the original record of the source register so users can view additional information if  
100 necessary.

101 For our first objective, the spatial and temporal spread of clinical research across the globe, we  
102 additionally extracted the country of origin from each original record.

103 During the follow-up and for our second objective (the assessment of transparency and quality  
104 assessment of trial registration) and third objective (the assessment of redundancies and research  
105 waste) we extracted the following additional information from each original record: date of last  
106 update, current recruitment status, expected or actual recruitment completion date, detailed  
107 information about the study design (i.e., method of allocation, masking and assignment) and detailed  
108 information about the intervention (i.e., therapeutic agents being used, dosage, frequency and duration  
109 of application).

110

## 111 **First objective: assessment of spatial and temporal evolution of** 112 **clinical research of COVID-19 across the globe**

113 To assess our first objective, we included all observational and interventional trials. We used the date  
114 of registration, the country of origin and the source register of each trial. All trials were divided  
115 according to their country of origin, countries with less than 10 trials were summarized as “other”. For  
116 better comparability and to determine if there are differences in research activity related to the  
117 population of a country or the incidence of COVID-19 cases we calculated the cumulative number of  
118 trials per 1 million inhabitants as well as the cumulative number of trials per 100 confirmed cases. The  
119 population of a given country was extracted from data published by the United Nations, Department of  
120 Economic and Social Affairs in the “2022 Revision of World Population Prospects” (we used the most  
121 recent estimation from the 1<sup>st</sup> of July 2021). The cumulative number of confirmed cases (on the 1<sup>st</sup> of  
122 April 2020) per continental region was extracted from the data published by the European Centre for  
123 Disease Prevention and Control (ECDC). The numbers of registered trials per 1 million inhabitants  
124 and per 100 confirmed cases were calculated by dividing the total number of registered trials from  
125 each continental region by the population respectively the confirmed cases of this region multiplying it



126 with 1.000.000 respectively 100. Furthermore, to assess if research followed the spread of the disease  
127 due to missing coordination as we hypothesized, we graphically displayed the evolution of cumulative  
128 trials per region compared to the cumulative confirmed cases in this region. Additionally, to determine  
129 what impact official declarations from institutions like the WHO might have had on the research  
130 activity, we divided all trials in two groups depending on whether the trial was registered before or  
131 after COVID-19 was declared a pandemic. Lastly, we analyzed which registers were used most  
132 frequently and from which countries.

133

## 134 **Follow-up assessment**

135 On the 11<sup>th</sup> of August 2022, more than 2 years after our initial data was collected, we initiated a  
136 follow-up search for each interventional trial to evaluate their progress and if the trials had been  
137 updated. From each original registration record, we manually extracted the latest recruitment status,  
138 overall trial status and the date of the last update. In this process we also identified if the investigated  
139 trials were active or discontinued. The discontinued trials were analyzed separately in our third  
140 objective (Assessment of Research Waste and Redundancies) for their reason of discontinuation and  
141 their investigated therapeutic agents.

142 Additionally, on the 18<sup>th</sup> of November 2022, more than 2,5 years after our initial data was collected,  
143 we performed a publication search for all active interventional trials, to find peer-reviewed and  
144 preprint articles. For this we used each individual Trial-ID and entered them into 4 major databases:  
145 LitCovid (<https://www.ncbi.nlm.nih.gov/research/coronavirus/>) & CochraneLibrary  
146 (<https://www.cochranelibrary.com> , with filter “all text”) for peer-reviewed publications and MedRxiv  
147 (<https://www.medrxiv.org>) & preVIEW:COVID-19 (<https://preview.zbmed.de> , with filter “Multi”)   
148 for preprint publications. Also, we verified if the publications or a summary of the results were linked  
149 to each trial protocol on their respective website as demanded by the WHO. Additionally, we  
150 calculated the time-to-publication in months by using the date of registration and the date on which the  
151 results were published first.

152

## 153 **Second objective: assessment of transparency and quality – trial** 154 **registration**

155 To assess our second objective, we included all active interventional trials. The following information  
156 from the original data set and from each original record by manual extraction during the follow-up  
157 search was used: original and latest recruitment status, date of first enrolment, estimated or actual  
158 study completion date and the date of the last update. First and foremost, we compared the original  
159 recruitment status with the latest recruitment status. The original recruitment status was either labelled  
160 as “not recruiting” or “recruiting” for each record. The latest recruitment status was, depending on the  
161 source register, described as “not yet recruiting”, “recruiting”, “active, not recruiting”, “enrolling by  
162 invitation”, “completed” and sometimes not stated at all. Analogue to the original recruitment status  
163 “not yet recruiting” and “active, not recruiting” was coded as “not recruiting”, “enrolling by  
164 invitation” was coded as “recruiting”. With the date of first enrolment, the estimated or actual  
165 completion date and the latest recruitment status we checked if trials exceeded either their date of  
166 enrolment and were still labelled as “not recruiting” or exceeded their estimated date of completion  
167 and were still labelled as “recruiting” and therefore should have had been updated. In addition to the  
168 publication search we checked if the published trials were labelled as “completed”. Also, we checked  
169 each record for retrospective registration by comparing the date of first enrolment with the date of  
170 registration. If the date of registration was in the past or on the date of first enrolment the trial was  
171 coded as “prospectively registered”, otherwise it was coded as “retrospectively registered”. Lastly, by  
172 comparing the date of the last update with the date of registration we checked if there were trials  
173 which never had been updated.

174 To assess the quality of the trial registrations, we screened each original registration record for  
175 completeness of the Trial Registration Data Set (TRDS, version 1.3.1) which currently contains 24  
176 items. (9) The complete list of the 24 items including the explanation at which point an item was  
177 considered as missing or displayed insufficiently is shown in (S2 Supporting information).

178

## 179 **Third objective: assessment of research waste and redundancies**

180 To assess our third objective, we included all interventional trials. first analyzed all discontinued trials  
181 for their reason of discontinuation and the rate of discontinuation per register.

182 After that we analyzed the study design of all active interventional trials. For this analysis, the  
183 following data from the original dataset was used or was manually extracted from the original record:  
184 method of allocation, masking, study assignment, if a control group was present, which type of control  
185 was established (standard operating procedures/standard of care vs. placebo vs. active comparator),  
186 study phase and sample size.

187 Additionally, we identified all active and discontinued interventional trials which investigated  
188 therapeutic agents except those which investigated complementary or alternative medicine such as  
189 traditional Chinese medicine and trials which used any advanced medicinal products such as umbilical  
190 cord stem cells. After that we screened those trials for each therapeutic agent being investigated to  
191 determine how often each drug was tested, and which was tested most often. We divided the results  
192 into active and discontinued trials to determine how many trials originally planned on investigating  
193 those interventions.

194

## 195 **Statistical analysis**

196 We used standard methods for descriptive statistics. All variables are either expressed as mean values  
197 with standard deviation, medians, and ranges or with absolute counts and percentages. Figs 4-5 are  
198 displayed as box-whiskers-plots. Temporal analyzations are displayed in months. Data analysis and  
199 figures were performed using SPSS (version 29, IBM) and Microsoft Excel.

200

## 201 **Results**

### 202 **Trial selection**

203 The trial selection is displayed in a flow diagram according to the PRISMA-guidelines. (Fig 1) On the  
204 1<sup>st</sup> of April our targeted convenience sample size of 1000 studies was exceeded. To avoid any sort of  
205 bias by falsely excluding any trials - since we could not identify which trial was the 1000<sup>th</sup> - we

206 included all trials registered until that day, resulting in a total of 1017 eligible trials. After excluding  
207 trials not related to COVID-19, duplicates and trials withdrawn from the registry we ended up with  
208 991 included trials. For our first objective we included all 991 trials. As the ICMJE and WHO  
209 consider trial registration to be mandatory only for interventional trials, we included only  
210 interventional trials for our follow-up search, our second objective (Assessment of Transparency and  
211 Quality Assessment – Trial Registration) and our third objective (Assessment of Redundancies and  
212 Research Waste) (n = 593). As we examined the trial registration process itself with these objectives,  
213 inclusion of observational trials would have led to false alteration of results as every information given  
214 about their trial registration can be considered voluntary. (7) During the follow-up we identified 103  
215 discontinued interventional trials which will be analyzed separately in our third objective for their  
216 reason of discontinuation and their investigated therapeutic agents. Therefore, for our second objective  
217 (assessment of transparency and quality) we included all 490 active interventional trials and for our  
218 third objective (assessment of research waste and redundancies) we included all 593 interventional  
219 trials.

220

221 **Fig 1. PRISMA-flow chart of trial selection: eligibility and inclusion process for each objective**

222

## 223 **First objective: assessment of spatial and temporal evolution of** 224 **clinical research of COVID-19 across the globe**

225 The very first trial related to COVID-19 was registered on the 23<sup>rd</sup> of January. While there were only  
226 15 trials registered in the last week of January, the numbers rapidly increased to 360 registered trials in  
227 February, rising to 568 trial registrations in March and 48 registrations only on the 1<sup>st</sup> of April,  
228 resulting in a total of 991 registered trials in less than 3 months. The first trials had their origins in  
229 China while the first trial outside of China was registered on the 5<sup>th</sup> of February 2020 in France. For a  
230 clearer demonstration of the differences in trial emergence, we graphically displayed the temporal  
231 evolution of trial registration in China compared to the rest of the World. (Fig 2)

232

233 **Fig 2. Evolution of trial registrations in China vs. rest of the world**

234 X-axis: Timeline from 23<sup>rd</sup> January 2020 to 01<sup>st</sup> April 2020, Y-axis: Cumulative trials registered in the  
 235 ICTRP with the keyword COVID-19 from China (blue) and the Rest of the World (orange). Data was  
 236 extracted from the original dataset downloaded from the ICTRP and from the original registration  
 237 record of each trial.

238  
 239 All in all, we identified a total of 39 different countries with 11 countries registering 10 or more trials.  
 240 All countries with less than 10 trials will be summarized as “other”. China had by far the most  
 241 registered trials with a total of 663 (66,9 %) of all 991 trials. Second most often was USA with 61  
 242 (6,2 %) followed by France with 44 (4,4 %), Iran with 40 (4,0 %) and Italy with 24 (2,4) trials. The  
 243 remaining 159 trials originated in decreasing numbers from Germany, United Kingdom, Netherlands,  
 244 Spain, Canada, Japan, and others. If calculated by trials per 1 million inhabitants, Netherlands (0,80),  
 245 France (0,682) and China (0,465) were leading. Considering the number of trials per 100 confirmed  
 246 cases China led with 0,806 trials per 100 cases, followed by Japan with 0,512 and Canada with 0,141.  
 247 (Table 1)

248 **Table 1. Spatial and temporal analysis of all 991 observational and interventional trials**

|                                         | CHN          | USA        | FRA        | IRN        | ITA        | DEU       |
|-----------------------------------------|--------------|------------|------------|------------|------------|-----------|
| <b>Registered trials in numbers n</b>   |              |            |            |            |            |           |
| Total                                   | 663 (66,9 %) | 61 (6,2 %) | 44 (4,4 %) | 40 (4,0 %) | 24 (2,4 %) | 19 (1,9%) |
| January                                 | 15 (100%)    | 0 (0%)     | 0 (0%)     | 0 (0%)     | 0 (0%)     | 0 (0%)    |
| February                                | 349 (96,9%)  | 6 (1,7%)   | 2 (0,6%)   | 0 (0%)     | 0 (0%)     | 0 (0%)    |
| March                                   | 293 (51,6%)  | 51 (9,0%)  | 36 (6,3%)  | 34 (6,0%)  | 24 (4,2%)  | 15 (2,6%) |
| 1st of April                            | 6 (12,5%)    | 4 (8,3%)   | 6 (12,5%)  | 6 (12,5%)  | 0 (0%)     | 4 (8,3%)  |
| Before declaration                      | 461 (69,5%)  | 9 (14,8%)  | 5 (11,4%)  | 0 (0%)     | 0 (0%)     | 0 (0%)    |
| After declaration                       | 202 (30,5%)  | 52 (85,2%) | 39 (88,6%) | 40 (100%)  | 24 (100%)  | 19 (100%) |
| Per 1 million inhabitants               | 0,465        | 0,181      | 0,682      | 0,455      | 0,405      | 0,228     |
| Per 100 confirmed cases                 | 0,806        | 0,032      | 0,084      | 0,09       | 0,023      | 0,028     |
| <b>Trials per register in numbers n</b> |              |            |            |            |            |           |
| ChiCTR                                  | 560 (100%)   | 0 (0%)     | 0 (0%)     | 0 (0%)     | 0 (0%)     | 0 (0%)    |
| ClinicalTrials.gov                      | 103 (31,7%)  | 61 (18,8%) | 31 (9,5%)  | 3 (0,9%)   | 24 (7,4%)  | 8 (2,5%)  |
| IRCT                                    | 0 (0%)       | 0 (0%)     | 0 (0%)     | 37 (100%)  | 0 (0%)     | 0 (0%)    |

|  |        |             |           |            |           |           |           |
|--|--------|-------------|-----------|------------|-----------|-----------|-----------|
|  | EU-CTR | 0 (0%)      | 0 (0%)    | 11 (42,3%) | 0 (0%)    | 0 (0%)    | 2 (7,7%)  |
|  | JPRN   | 0 (0%)      | 0 (0%)    | 0 (0%)     | 0 (0%)    | 0 (0%)    | 0 (0%)    |
|  | Other  | 0 (0%)      | 0 (0%)    | 2 (6,1%)   | 0 (0%)    | 0 (0%)    | 9 (27,3%) |
|  | Total  | 663 (66,9%) | 61 (6,2%) | 44 (4,4%)  | 40 (4,0%) | 24 (2,4%) | 19 (1,9%) |

249 CHN, China; USA, United States of America; FRA, France; IRN, Iran; ITA, Italy; DEU, Germany;  
 250 GBR, Great Britain; NLD, Netherlands; ESP, Spain; CAN, Canada; JPN, Japan. ChiCTR, Chinese  
 251 Clinical Trials Registry; IRCT, Iranian Registry for Clinical Trials; EU-CTR, European Clinical Trials  
 252 Registry; JPRN, Japan Primary Registry Network. All numbers are total counts. Percentages of the  
 253 rows “Before declaration” and “After declaration” refer to the respective value of row “Total”.  
 254 Percentages of the column “World” refer to the total 991 trials of the first row. The other percentages  
 255 of each row refer to the respective value of the column “World”. Data was extracted from the original  
 256 dataset downloaded from the ICTRP and from the original registration record of each trial.

257  
 258 If divided into before and after COVID-19 was declared a pandemic on the 11<sup>th</sup> of March 2020, we see  
 259 that the distribution is nearly even with 485 (48,9 %) registered before and 506 (51,1 %) trials  
 260 registered after the declaration. A majority of 461 (95,1 %) of all 485 trials registered before the  
 261 pandemic declaration originated from China while after the declaration only 201 (39,7 %) of all 506  
 262 trials registered after the declaration originated from China. This is followed by the USA with 9  
 263 (1,9 %) trials before and 52 (10,2 %) trials after the declaration, France with 5 (1,0 %), respectively 39  
 264 (7,7 %) trials and Iran with all 40 trials (7,9%) registered after the pandemic declaration. Moreover,  
 265 most of the trials originating from China were registered before the declaration with 69,6 %, while  
 266 most of the trials from other regions were registered after the declaration with the U.S. registering  
 267 85,2%, France registering 88,6% and Iran registering 100 % of their trials after the declaration. In  
 268 addition, we graphically depicted the temporal evolution of confirmed cases compared to registered  
 269 trials. In this view, it appears that the Chinese curve is already in stagnation for both cases and trials,  
 270 whereas the curve of the other countries just start to rise. (Fig 3-13, Table 1)

271

272 **Fig 3-13. Cumulative trials vs. cumulative cases per country over time**

273 (Fig 3) China, (Fig 4) United States, (Fig 5) France, (Fig 6) Iran, (Fig 7) Italy, (Fig 8) Germany, (Fig  
274 9) United Kingdom, (Fig 10) Netherlands, (Fig 11) Spain, (Fig 12) Canada, (Fig 13) Japan. X-Axis:  
275 Timeline from the 31<sup>st</sup> of December 2019 to 01<sup>st</sup> of April 2020. Y-Axis: Logarithmic representation of  
276 the cumulative number of confirmed cases of COVID-19 (blue) compared to the cumulative number  
277 of registered trials regarding COVID-19 (orange) for each country. The numbers of trials were  
278 extracted from the ICTRP with the keyword COVID-19, the number of confirmed cases were  
279 extracted from publicly available data from European Center for Disease Control.

280  
281 Overall, 12 different registries were used for registration: Chinese Trials Registry (CTR),  
282 ClinicalTrials.gov, Iranian Registry of Clinical Trials (IRCT), European Clinical Trials Registry (EU-  
283 CTR), Japan Primary Registry Network (JPRN), German Clinical Trials Registry (DRKS),  
284 Netherlands Trial Registry (NTR), International Standard Registered Clinical Trial Number registry  
285 (ISRCTN), Thailand Clinical Trials Registry (TCTR), Clinical Trials Registry India (CTRI),  
286 Australian and New Zealand Clinical Trials Registry (ANZCTR) and the Brazilian Registry of  
287 Clinical Trials (ReBEC). ChiCTR was used most frequently with 560 (56,5%) trials of which all  
288 originated from China. Clinicaltrials.gov was used second most often with a total of 325 (32,8 %)  
289 trials of which 103 originated from China, 61 from the US, 31 from France, 24 from Italy and the  
290 remaining 109 trials in decreasing numbers from Canada, UK, Spain, Germany, Iran, Netherlands, and  
291 others. IRCT is third with 37 (3,7 %) trials, which all originated from Iran, followed by EU-CTR with  
292 26 (2,6 %) registrations and JPRN with 10 (1,0 %) registered trials. The remaining 33 trials are spread  
293 over the remaining registers with all having less than 10 registrations each and therefore are  
294 summarized as “other”. (Table 1)

295

## 296 **Follow-up assessment after 2 years**

297 For the assessment of transparency in trial registration of our second objective we conducted a follow  
298 up search for all 593 interventional trials after more than two years during which we extracted the  
299 latest recruitment status, overall trial status and the date of the last update. Nearly half of those trials  
300 were registered with the ChiCTR (49,4 %), more than a third were registered with ClinicalTrials.gov

301 (37,1%), and the remaining were registered in decreasing order with the IRCT, the EU-CTR and the  
 302 JPRN. Registers with less than 10 registrations each were summarized as “other”. During the follow-  
 303 up process we identified 103 (17,4%) of those trials were discontinued. The discontinued trials were  
 304 separately analyzed in our third objective for their reason of discontinuation and their investigated  
 305 therapeutic agents. (Table 2)

306

307 **Table 2. Intervention trials per register and discontinuation of trials.**

|                                          | Source Register |                    |       |           |                    |
|------------------------------------------|-----------------|--------------------|-------|-----------|--------------------|
|                                          | ChiCTR          | ClinicalTrials.gov | IRCT  | EU-CTR    | Other <sup>1</sup> |
| <b>Interventional trials</b>             |                 |                    |       |           |                    |
| <b>in numbers n</b>                      |                 |                    |       |           |                    |
| Total registered interventional trials   | 293             | 220                | 37    | 26        | 17                 |
| Total discontinued interventional trials | 39              | 48                 | 0     | 13        | 3                  |
| Total active interventional trials       | 254             | 172                | 37    | 13        | 14                 |
| Discontinuation rate per register        | 13,30%          | 21,80%             | 0,00% | 50,00%    | 17,60%             |
| <b>Reason for discontinuation</b>        |                 |                    |       |           |                    |
| <b>in numbers n</b>                      |                 |                    |       |           |                    |
| Not stated                               | 33 (84,6%)      | 0 (0%)             | -     | 6 (46,2%) | 2 (66,7%)          |
| Difficulties with enrolment              | 5 (12,8%)       | 22 (35,8%)         | -     | 3 (23,1%) | 0 (0%)             |
| New evidence/treatment guidelines        | 0 (0%)          | 10 (20,8%)         | -     | 2 (15,4%) | 1 (33,3%)          |
| Authority decision or recommendation     | 0 (0%)          | 5 (10,4%)          | -     | 0 (0%)    | 0 (0%)             |
| Changed to expanded access study         | 0 (0%)          | 5 (10,4%)          | -     | 0 (0%)    | 0 (0%)             |
| Logistics, staff, or resource issues     | 0 (0%)          | 2 (4,2%)           | -     | 1 (7,7%)  | 0 (0%)             |
| Change of study design/protocol          | 1 (2,6%)        | 2 (4,2%)           | -     | 1 (7,7%)  | 0 (0%)             |
| Planned termination criteria             | 0 (0%)          | 1 (2,1%)           | -     | 0 (0%)    | 0 (0%)             |
| Futility                                 | 0 (0%)          | 1 (2,1%)           | -     | 0 (0%)    | 0 (0%)             |

308 ChiCTR, Chinese Clinical Trials Registry; IRCT, Iranian Registry for Clinical Trials; EU-CTR,  
 309 European Clinical Trials Registry. All numbers are total counts. Percentages for the section “Reason  
 310 for discontinuation” refer to the respective value of the row “Total discontinued interventional trials”.  
 311 Data was extracted from the original dataset downloaded from the ICTRP and from the original  
 312 registration record of each trial.



313 <sup>1</sup>Other registers include: JPRN, Japanese Primary Registry Network (n = 6); NTR, Netherlands Trial  
 314 Registry (n = 3); ISRCTN, International Standard Registered Clinical Trial Number registry (n = 3);  
 315 DRKS, German Clinical Trials Registry (n = 1); TCTR, Thailand Clinical Trials Registry (n = 1);  
 316 ReBEC, Brazilian Registry of Clinical Trials (n = 1); ANZCTR, Australian and New Zealand Clinical  
 317 Trials Registry (n = 1); CTRI, Clinical Trials Registry India (n = 1).

318

### 319 **Publication pattern**

320 To assess the publication pattern of the 490 active interventional trials we conducted a publication  
 321 search two and a half years after our initial data was collected. We identified a total of 139 trials  
 322 (28,4%) which already published results after 2 years. 84,2 % of those publications were already peer-  
 323 reviewed and 15,8 % were only available as preprint articles. Of those 139 trials only 18,7 %  
 324 registration records provided a link or a summary of those results on their original record on their  
 325 respective source register. 3 (2,2%) trials have submitted a summary of their results to their registry,  
 326 but those have not yet been published. Detailed results are shown in Table 3.

327

328 **Table 3. Publication pattern per register**

|                                           | <b>ChiCTR</b> | <b>ClinicalTrials.gov</b> | <b>IRCT</b> | <b>EU-CTR</b> | <b>Other<sup>1</sup></b> |
|-------------------------------------------|---------------|---------------------------|-------------|---------------|--------------------------|
| <b>Total active interventional trials</b> | 254 (51,8%)   | 172 (35,1%)               | 37 (7,6%)   | 13 (2,7%)     | 14 (2,9%)                |
| <b>Published Trials</b>                   |               |                           |             |               |                          |
| Total                                     | 47 (18,5%)    | 74 (43,0%)                | 6 (16,2%)   | 6 (46,2%)     | 6 (42,9%)                |
| Peer-Reviewed                             | 31 (66,0%)    | 69 (93,2%)                | 5 (83,3%)   | 6 (100%)      | 6 (100%)                 |
| Preprint                                  | 16 (34,0%)    | 5 (6,8%)                  | 1 (16,7%)   | 0             | 0                        |

329 ChiCTR, Chinese Clinical Trials Registry; IRCT, Iranian Registry for Clinical Trials; EU-CTR,  
 330 European Clinical Trials Registry. All numbers are total counts. Percentages of the row “Total active  
 331 interventional trials” refer to the total number of active trials (n = 490). Percentages of the row “Total”  
 332 refer to the respective value of the row “Total active interventional trials”. Percentages of the rows  
 333 “Peer-reviewed” and “Preprint” refer to the respective value of row “Total”. Data was extracted from  
 334 the original dataset downloaded from the ICTRP and from the original registration record of each trial.

335 <sup>1</sup>Other registers include: JPRN, Japanese Primary Registry Network (n = 5); NTR, Netherlands Trial  
336 Registry (n = 2); ISRCTN, International Standard Registered Clinical Trial Number registry (n = 3);  
337 DRKS, German Clinical Trials Registry (n = 1); ReBEC, Brazilian Registry of Clinical Trials (n = 1);  
338 ANZCTR, Australian and New Zealand Clinical Trials Registry (n = 1); CTRI, Clinical Trials  
339 Registry India (n = 1).

340  
341 Additionally, we graphically displayed the time to publication calculated from the date of registration  
342 to the date the publications were first published. Peer-reviewed articles were published after a mean  
343 time of 11,69 months (SD: 7,78), a median time of 10,59 months, the 25 percentile was 4,66 months  
344 and the 75 percentile was 17,59 months. Preprint articles were published after a mean time of 4,12  
345 months (SD: 2,53), a median time of 3,89 months, the 25 percentile was 2,1 months and the 75  
346 percentile was 6,2 months. (Fig 14)

347  
348 **Fig 14. Box-Whiskers-Plot of the time-to-publication divided into peer-reviewed and preprint**  
349 **articles.**

350 X-axis: Type of publication divided into peer-reviewed and preprint articles, Y-axis: Time to  
351 publication expressed in months calculated as the period from the date of registration to the date of  
352 first publication. The publication search was conducted by entering each individual trial-ID into 4  
353 major databases: LitCOVID, CochraneLibrary, MedRxiv and preVIEW:COVID-19. The date of  
354 registration was extracted from the original database.

355  
356 **Second objective: assessment of transparency and quality – trial**  
357 **registration**

358 As stated above, the WHO and ICMJE consider trial registration to be mandatory only for  
359 interventional trials, therefore we excluded all observational trials (n=398) for this objective, the  
360 assessment of the trial registration itself.

361

## 362 **Assessment of transparency**

363 To assess the transparency of trial registration we excluded all trials which were found as discontinued  
 364 in the follow-up search (n=103). The discontinued trials were analyzed separately for their reason of  
 365 discontinuation and their therapeutic agents in the third objective. This resulted in 490 included trials  
 366 and only 4 registers with more than 10 registrations: ChiCTR (n = 254), ClinicalTrials.gov (n = 172),  
 367 IRCT (n = 37) and EU-CTR (n = 13). The rest of 14 trials will be summarized as others. The results  
 368 for this assessment are displayed in Table 4.

370 **Table 4. Assessment of Transparency – Analysis of the Progress of Active Interventional Trials**

|                                                                                 | <b>Source Register</b> |                           |                   |                  |
|---------------------------------------------------------------------------------|------------------------|---------------------------|-------------------|------------------|
|                                                                                 | <b>ChiCTR</b>          | <b>ClinicalTrials.gov</b> | <b>IRCT</b>       | <b>EU</b>        |
| <b>Total active interventional trials</b>                                       | 254 (51,8)             | 172 (35,1 %)              | 37 (7,6 %)        | 13 (3,1 %)       |
| <b>Prospective/Retrospective registration</b>                                   |                        |                           |                   |                  |
| Prospective                                                                     | 135 (53,1 %)           | 132 (76,7 %)              | 13 (35,1%)        | 12 (30,8 %)      |
| Retrospective                                                                   | <b>119 (46,9 %)</b>    | <b>40 (23,3 %)</b>        | <b>24 (64,9%)</b> | <b>1 (2,6 %)</b> |
| <b>Original recruitment status (time of registration)</b>                       |                        |                           |                   |                  |
| Recruiting                                                                      | 145 (57,1 %)           | 91 (52,9 %)               | 23 (62,2%)        | 1 (2,6 %)        |
| Not Recruiting                                                                  | 109 (42,1 %)           | 81 (47,1 %)               | 14 (37,8%)        | 12 (30,8 %)      |
| <b>Latest recruitment status (11 August 2022)</b>                               |                        |                           |                   |                  |
| Recruiting                                                                      | 144 (56,7 %)           | 46 (26,7 %)               | 0 (0%)            | 0 (0 %)          |
| Not Recruiting                                                                  | 103 (40,6 %)           | 44 (25,6 %)               | 1 (2,7%)          | 0 (0 %)          |
| Completed                                                                       | 7 (2,7 %)              | 82 (47,7 %)               | 36 (97,3%)        | 6 (15,4 %)       |
| Not Stated                                                                      | 0 (0 %)                | 0 (0 %)                   | 0 (0%)            | 7 (17,7 %)       |
| <b>Trials exceeding enrolment date per recruitment status</b>                   |                        |                           |                   |                  |
| Recruiting                                                                      | 144 (56,7 %)           | 46 (26,7 %)               | 0 (0%)            | 0 (0 %)          |
| Not Recruiting                                                                  | <b>103 (40,6 %)</b>    | <b>44 (25,6 %)</b>        | <b>1 (2,7%)</b>   | <b>0 (0 %)</b>   |
| Completed                                                                       | 7 (2,7 %)              | 82 (47,7 %)               | 36 (97,3%)        | 6 (15,4 %)       |
| Not Stated                                                                      | 0 (0 %)                | 0 (0 %)                   | 0 (0%)            | 7 (17,7 %)       |
| Total                                                                           | 254                    | 172                       | 37                | 13               |
| <b>Trials exceeding estimated/actual completion date per recruitment status</b> |                        |                           |                   |                  |
| Recruiting                                                                      | <b>139 (54,7 %)</b>    | <b>38 (22,1 %)</b>        | 0 (0%)            | 0 (0 %)          |
| Not Recruiting                                                                  | 100 (39,4 %)           | 32 (18,6 %)               | 1 (2,7%)          | 0 (0 %)          |

|                                                    |                     |                    |                   |              |
|----------------------------------------------------|---------------------|--------------------|-------------------|--------------|
| Completed                                          | 7 (2,8 %)           | 81 (47,1 %)        | 36 (97,3%)        | 6 (4)        |
| Total                                              | 246 (96,9 %)        | 151 (87,8 %)       | 37 (100%)         | 6 (4)        |
| <b>Update history of trials</b>                    |                     |                    |                   |              |
| Never Updated                                      | <b>102 (40,2 %)</b> | 0 (0 %)            | <b>16 (43,2%)</b> |              |
| Within first week                                  | 69 (27,2 %)         | 13 (7,6 %)         | 5 (13,5%)         |              |
| Within first month                                 | 56 (22,0 %)         | 28 (16,3 %)        | 5 (13,5%)         |              |
| Within first half year                             | 22 (8,7 %)          | 40 (23,3 %)        | 8 (21,6%)         |              |
| More than a half year after registration           | 5 (1,9 %)           | 91 (52,9 %)        | 3 (8,1%)          |              |
| <b>Never updated trials per recruitment status</b> |                     |                    |                   |              |
| Recruiting                                         | 54 (53,0 %)         | 0 (0 %)            | 0 (0%)            |              |
| Not recruiting                                     | 47 (46,1 %)         | 0 (0 %)            | 1 (6,3%)          |              |
| Completed                                          | <b>1 (0,9 %)</b>    | 0 (0 %)            | <b>15 (93,8%)</b> |              |
| <b>Published trials per recruitment status</b>     |                     |                    |                   |              |
| Total                                              | <b>47 (18,5 %)</b>  | <b>74 (43,0 %)</b> | <b>6 (16,2%)</b>  | <b>6 (4)</b> |
| Recruiting                                         | <b>30 (63,8 %)</b>  | <b>9 (12,2 %)</b>  | 0 (0%)            | 0 (0)        |
| Not recruiting                                     | <b>15 (31,9 %)</b>  | <b>12 (16,2 %)</b> | 0 (0%)            | 0 (0)        |
| Completed                                          | 2 (4,3 %)           | 53 (71,6 %)        | 6 (100%)          | 2 (3)        |
| Not stated                                         | 0 (0 %)             | 0 (0 %)            | 0 (0%)            | <b>4 (6)</b> |
| Linked to record                                   | 0 (0 %)             | 20 (27,0 %)        | 0 (0%)            | 2 (3)        |
| Not Linked to record                               | <b>47 (100,0 %)</b> | <b>52 (70,3 %)</b> | <b>6 (100,0%)</b> | <b>3 (5)</b> |
| Submitted to record                                | 0 (0 %)             | 2 (2,7 %)          | 0 (0%)            | 1 (1)        |

371 ChiCTR, Chinese Clinical Trials Registry; IRCT, Iranian Registry for Clinical Trials; EU-CTR,  
372 European Clinical Trials Registry. All numbers are total counts. Percentages of the row “Total active  
373 interventional trials” refer to the total number of active trials (n = 490). Percentages in the section  
374 “Published trials per recruitment status” refer to the respective value of the row “Total” of the same  
375 section. All other percentages refer to the respective value of the row “Total active interventional  
376 trials”. Data was extracted from the original dataset downloaded from the ICTRP and from the original  
377 registration record of each trial.

378 <sup>1</sup>Other registers include: JPRN, Japanese Primary Registry Network (n = 5); NTR, Netherlands Trial  
379 Registry (n = 2); ISRCTN, International Standard Registered Clinical Trial Number registry (n = 3);  
380 DRKS, German Clinical Trials Registry (n = 1); ReBEC, Brazilian Registry of Clinical Trials (n = 1);  
381 ANZCTR, Australian and New Zealand Clinical Trials Registry (n = 1); CTRI, Clinical Trials  
382 Registry India (n = 1).

383 \*Trial records registered with the EU-CTR did not state the date of their last update, therefore no  
384 calculation was possible.

385

386 First, we checked all included trials for prospective or retrospective registration and found out that  
387 more than a third were registered retrospectively (37,2 %). The highest rate of retrospectively  
388 registered trials had the IRCT with almost two thirds (64,9 %), followed by the ChiCTR with almost  
389 half their trials being registered retrospectively (46,9 %).

390 Then we checked each trial for their original recruitment status to compare it with the findings of our  
391 follow-up search after two years. Originally, more than half of the trials were registered as “recruiting”  
392 (55,1 %) while the rest were registered as “not recruiting”. As of the 11<sup>th</sup> of August 2022, the date of  
393 our follow-up search more than a third were still labelled as “recruiting” (39,2 %), while slightly less  
394 than a third were either labelled as “not recruiting” (30,6 %) or were already labelled as “completed”  
395 (28,8 %). The rest had not stated their recruitment status (1,4 %). All 490 trials exceeded their date of  
396 first enrolment, which means all trials currently labelled as “not recruiting” had not been updated  
397 accordingly. 91,4 % of the trials also exceeded their estimated or actual completion date of which  
398 more than a third (36,1 %) were still labelled as “recruiting”. Those trials therefore had not been  
399 updated accordingly as well. This adds up to a total of 66,7 % trials which had not been updated  
400 accordingly.

401 Furthermore, we found out that nearly a quarter had not been updated once since their date of  
402 registration (24,3 %). Out of those trials, 12,6 % were labelled as “completed” in their latest version of  
403 their registration record, which implies that they were already registered as “completed” even though  
404 the downloaded database from the WHO stated otherwise.

405 Additionally, we found out that slightly less than half the trials which already published results were  
406 labelled as “completed” (48,9 %) with the rest either been labelled as “recruiting”, “not recruiting” or  
407 not having stated any status in decreasing order.

408

409 **Assessment of quality**

410 To assess the quality of the registration records and the registries itself we checked each record for  
 411 completeness of the Trial Registration Data Set (TRDS). (S2 Supporting information, Table 5) Across  
 412 all registers item 13 (interventions) was most frequent with 43,9 % of all trials displaying insufficient  
 413 information. Most of those trials have not stated any or insufficient information about the dosage,  
 414 frequency of application or duration of the treatment. The EU-CTR had the highest rate of missing  
 415 information on this item with 69,2 % of their trials, followed by the ChiCTR, the IRCT and  
 416 ClinicalTrials.gov. Item 21 (ethics review) was missing second most often with 40,2 % of all trials not  
 417 displaying any information on their ethics review. ClinicalTrials.gov had the highest rate of missing  
 418 information on this item with 97,1 % of their records. By not stating the allocation method, masking or  
 419 the type of assignment, item 15 (study type) was missing third most often in 22,4 % of all trial records.  
 420 On this item the ChiCTR had the highest rate of missing information with 40,9 % of their records. The  
 421 summarization of results (item 23) was missing for 79,1 % of the 139 trials which already published  
 422 results by not providing a summary of the results or a link to the published results in their original  
 423 record. ChiCTR and ICRT both had the highest rate of issues on this item with 100 % of their  
 424 published trials not providing a summary or a link to the publication on their record. This was  
 425 followed by ClinicalTrials.gov with 70,3 % and the EU-CTR with 50,0 % of their trials. The contact  
 426 information for public and scientific queries (items 7 and 8) were completely missing in 3,9 % across  
 427 all registers, however for another 15,9 % of all trials, the information was only available in the WHO  
 428 dataset and not in the original record from the source register. Seventy-seven of these trials were  
 429 registered with ClinicalTrials.gov with a rate of 44,7 % of their total 172 registered trials.

430

431 **Table 5. Assessment of quality – Completeness of the Trial Registration Data Set**

| Missing TRDS Items                        | Number of trials with missing or insufficient information |                    |        |          |
|-------------------------------------------|-----------------------------------------------------------|--------------------|--------|----------|
|                                           | ChiCTR                                                    | ClinicalTrials.gov | IRCT   | EU-CTR   |
| Total trials                              | 254                                                       | 172                | 37     | 13       |
| 4. Source(s) of monetary/material support | 2 (0,8%)                                                  | 0 (0%)             | 0 (0%) | 1 (7,7%) |
| 5. Primary Sponsor                        | 0 (0%)                                                    | 0 (0%)             | 0 (0%) | 0 (0%)   |
| 7. Contact for public queries             |                                                           |                    |        |          |
| Completely missing                        | 0 (0%)                                                    | 19 (11,0%)         | 0 (0%) | 0 (0%)   |

|                                            |             |             |            |            |
|--------------------------------------------|-------------|-------------|------------|------------|
| Not shown on registry website              | 0 (0%)      | 77 (44,8%)  | 0 (0%)     | 1 (7,7%)   |
| 8. Contact for scientific queries          |             |             |            |            |
| Missing                                    | 0 (0%)      | 19 (11,0%)  | 0 (0%)     | 0 (0%)     |
| Not shown on registry website              | 0 (0%)      | 77 (44,8%)  | 0 (0%)     | 1 (7,7%)   |
| 11. Countries of recruitment               | 0 (0%)      | 13 (7,6%)   | 0 (0%)     | 1 (7,7%)   |
| 13. Interventions                          | 155 (61,0%) | 34 (19,8%)  | 15 (40,5%) | 9 (69,2%)  |
| Intervention name described insufficiently | 42 (16,5%)  | 0 (0%)      | 0 (0%)     | 1 (7,7%)   |
| Dosage, frequency, or duration missing     | 76 (29,9%)  | 4 (2,3%)    | 1 (2,7%)   | 8 (61,5%)  |
| Standard of care as comparator             | 37 (14,6%)  | 30 (17,4%)  | 14 (37,8%) | 0 (0%)     |
| 15. Study type                             | 104 (40,9%) | 2 (1,2%)    | 0 (0%)     | 1 (7,7%)   |
| 16. Date of first enrolment                | 0 (0%)      | 0 (0%)      | 0 (0%)     | 13 (100%)  |
| 18. Recruitment status                     | 0 (0%)      | 0 (0%)      | 0 (0%)     | 12 (92,3%) |
| 21. Ethics review                          | 27 (10,6%)  | 167 (97,1%) | 0 (0%)     | 0 (0%)     |
| 22. Completion date                        | 1 (0,4%)    | 0 (0%)      | 0 (0%)     | 0 (0%)     |
| 23. Summary results                        | *           | *           | *          | *          |
| 24. IPD sharing statement                  | 8 (3,1%)    | 37 (21,5%)  | 0 (0%)     | 12 (92,3%) |

432 ChiCTR, Chinese Clinical Trials Registry; IRCT, Iranian Registry for Clinical Trials; EU-CTR,  
433 European Clinical Trials Registry. Only items which are missing information are displayed, all items  
434 not mentioned have not been missing information. All numbers are total counts. All percentages refer  
435 to the respective value of the row “Total trials”. Data was extracted from the original registration  
436 records of each trial and analyzed according to S2 Supporting information.

437 <sup>1</sup>Other registers include: JPRN, Japanese Primary Registry Network (n = 5); NTR, Netherlands Trial  
438 Registry (n = 2); ISRCTN, International Standard Registered Clinical Trial Number registry (n = 3);  
439 DRKS, German Clinical Trials Registry (n = 1); ReBEC, Brazilian Registry of Clinical Trials (n = 1);  
440 ANZCTR, Australian and New Zealand Clinical Trials Registry (n = 1); CTRI, Clinical Trials  
441 Registry India (n = 1).

442 \*Item 23 is represented in Table 4 in the section “Published trials per recruitment status”.

443

## 444 **Third objective: assessment of research waste and redundancies**

### 445 **Assessment of research waste**

446 For the assessment of research waste, we first investigated the discontinued trials for their reason of  
447 discontinuation. During the two-year follow-up process we identified that 17,4 % of the interventional

448 trials were discontinued due to several reasons. We sorted all stated reasons for discontinuation into 8  
 449 different categories. We also divided those trials by their source register and calculated the  
 450 discontinued trials per total trials per register by dividing the total number of discontinued trials by the  
 451 total number of trials from one register. 39,8 % of the discontinued trials unfortunately did not state  
 452 any reason. After that, the most frequent reason was “difficulties with enrolment” with 29,1 % trials  
 453 followed by “new evidence or new treatment guidelines” from other trials and/or publications with  
 454 12,6 % trials. Divided into registers, ClinicalTrials.gov had the most discontinued trials with 56,3 % of  
 455 all discontinued trials followed by ChiCTR with 37,9 % trials and EU-CTR with 12,6 %. If we look at  
 456 the rate of discontinued trials per total trials per register however, we see that out of all registers with  
 457 more than 10 registered trials, the EU-CTR has the highest rate of discontinued trials with 50,0 %  
 458 followed by ClinicalTrials.gov with 21,8 % and ChiCTR with 13,3 %. (Table 2)

459 We further evaluated potential research waste by analyzing the study design across the remaining 490  
 460 active interventional trials with extensive results shown in Table 6. Overall, randomized-controlled  
 461 trials (RCT) were most common with more than two thirds of all 490 interventional trials (68,3 %),  
 462 followed by single arm trials and non-randomized-controlled trials (NRCT). In the group of RCTs,  
 463 44,4 % trials were not masked while 27,5 % had not given any information about their masking.  
 464 Seventy-eight-point-five percent of the RCTs used “standard of care” as the control while the rest used  
 465 a placebo. In the group of NRCTs 35,4 % trials were not masked and 10,4 % did not state any  
 466 information on their masking. Ninety-five-point-eight percent used “standard of care” and 4,2 % trials  
 467 a placebo as their control group. The most frequent study phase over all interventional trials was phase  
 468 0 with 23,3 % followed by phase 2 trials with 17,3 %. The study phase of 24,9 % trials was either not  
 469 applicable or not stated. The mean target size over all 490 trials was 591,56 subjects (SD 3445,83), the  
 470 median 100 subjects, the 25 percentile 60 subjects and the 75 percentile 255,75 subjects. The target  
 471 sizes according to each study phase are shown in Fig 15.

472

473 **Table 6. Assessment of Research Waste – Analysis of Study Design of active interventional trials.**

|       | Study design |           |            |           |            |       |
|-------|--------------|-----------|------------|-----------|------------|-------|
|       | RCT          | NRCT      | Single Arm | RP        | Sequential | N     |
| Total | 335 (68,4%)  | 48 (9,8%) | 61 (12,4%) | 20 (4,1%) | 14 (2,9%)  | 8 ( ) |



| <b>Masking</b>     |             |            |            |            |            |       |
|--------------------|-------------|------------|------------|------------|------------|-------|
| None               | 149 (44,5%) | 17 (35,4%) | 47 (77,0%) | 11 (55,0%) | 2 (14,3%)  | 5 (6) |
| Single             | 26 (7,8%)   | 0 (0%)     | 0 (0%)     | 5 (25,0%)  | 0 (0%)     | 0 (0) |
| Double             | 36 (10,7%)  | 2 (4,2%)   | 0 (0%)     | 0 (0%)     | 0 (0%)     | 0 (0) |
| Triple             | 7 (2,1%)    | 0 (0%)     | 0 (0%)     | 1 (5,0%)   | 0 (0%)     | 0 (0) |
| Quadruple          | 25 (7,5%)   | 0 (0%)     | 0 (0%)     | 1 (5,0%)   | 0 (0%)     | 0 (0) |
| N/A                | 6 (1,8%)    | 24 (50,0%) | 13 (21,3%) | 0 (0%)     | 14 (100%)  | 3 (3) |
| Not Stated         | 86 (25,7%)  | 5 (10,4%)  | 1 (1,6%)   | 1 (5,0%)   | 0 (0%)     | 0 (0) |
|                    |             |            |            |            |            |       |
| <b>Control</b>     |             |            |            |            |            |       |
| None               | 0 (0%)      | 0 (0%)     | 61 (100%)  | 20 (100%)  | 13 (92,9%) | 7 (8) |
| Standard of Care   | 263 (78,5%) | 46 (95,8%) | 0 (0%)     | 0 (0%)     | 1 (7,1%)   | 1 (1) |
| Placebo            | 72 (21,5%)  | 2 (4,2%)   | 0 (0%)     | 0 (0%)     | 0 (0%)     | 0 (0) |
| <b>Study Phase</b> |             |            |            |            |            |       |
| 0                  | 77 (23,0%)  | 14 (29,2%) | 12 (19,7%) | 1 (5,0%)   | 6 (42,9%)  | 1 (1) |
| 1                  | 13 (3,9%)   | 3 (6,3%)   | 12 (19,7%) | 2 (10,0%)  | 2 (14,3%)  | 1 (1) |
| 2                  | 59 (17,6%)  | 9 (18,8%)  | 12 (19,7%) | 3 (15,0%)  | 0 (0%)     | 2 (2) |
| 3                  | 52 (15,5%)  | 2 (4,2%)   | 4 (6,6%)   | 7 (35,0%)  | 0 (0%)     | 1 (1) |
| 4                  | 55 (16,4%)  | 7 (14,6%)  | 2 (3,3%)   | 4 (20,0%)  | 1 (7,1%)   | 1 (1) |
| N/A                | 79 (23,6%)  | 13 (27,1%) | 19 (31,1%) | 3 (15,0%)  | 5 (35,7%)  | 2 (2) |

474 RCT, Randomized Controlled Trial; NRCT, Non-Randomized Controlled Trial; RP, Randomized  
475 Parallel Trial; NRP, Non-Randomized Parallel Trial. All numbers are total counts. Percentages of the  
476 row “Total” refer to the total number of active interventional trials (n = 490). All other percentages  
477 refer to the respective value of the row “Total”. Data was extracted from the original dataset  
478 downloaded from the ICTRP and from the original registration record of each trial.

479

480 **Fig 15. Box-Whiskers-Plot of the Target Sizes per Study Phase of all active interventional trials**

481 X-axis: Active interventional trials separated into the different study phases; N/A, not applicable or  
482 not stated. Y-axis: Logarithmic representation of the target sizes. Outliers are titled with their  
483 individual trial-ID. Data was extracted from the original dataset downloaded from the ICTRP and  
484 from the original registration record of each trial.

485

486 **Assessment of redundancies**

487 To identify possible redundancies among all interventional trials we analyzed the different therapeutic  
 488 agents being investigated. (Table 7) We identified a total of 261 trials which used a therapeutic agent  
 489 other than complementary or alternative medicine and advanced medicinal products. Of those 261  
 490 trials 200 were still active and 61 discontinued. Over all 261 trials we identified 94 different drugs.  
 491 (Hydroxy)-chloroquine was by far the drug tested most often with 31,8 % trials. After that ritonavir,  
 492 lopinavir and interferons were tested most often in decreasing order. (Hydroxy)-chloroquine also had  
 493 the highest rate on discontinued trials with 38,6 % out of 83 total trials. This was followed by  
 494 remdesivir with 36,4 % and azithromycin with 33,3 %.

495  
 496 **Table 7. Assessment of redundancies – Analysis of investigated therapeutic agents across all**  
 497 **interventional trials.**

|                              | Active     | Discontinued | Total      | Discontinued/Total |
|------------------------------|------------|--------------|------------|--------------------|
| <b>Interventional trials</b> | 490        | 103          | 593        | 17,4%              |
| <b>Therapeutic agents</b>    |            |              |            |                    |
| (Hydroxy)-Chloroquine        | 51 (10,4%) | 32 (31,1%)   | 83 (14,0%) | 38,6%              |
| Ritonavir                    | 35 (7,1%)  | 5 (4,9%)     | 40 (6,7%)  | 12,5%              |
| Lopinavir                    | 30 (6,1%)  | 5 (4,9%)     | 35 (5,9%)  | 14,3%              |
| Interferone                  | 24 (4,9%)  | 1 (1,0%)     | 25 (4,2%)  | 4,0%               |
| Tocilizumab                  | 11 (2,2%)  | 4 (3,9%)     | 15 (2,5%)  | 26,7%              |
| Favipiravir                  | 12 (2,4%)  | 0 (0%)       | 12 (2,0%)  | 0%                 |
| Azithromycin                 | 8 (1,6%)   | 4 (3,9%)     | 12 (2,0%)  | 33,3%              |
| Remdesivir                   | 7 (1,4%)   | 4 (3,9%)     | 11 (1,9%)  | 36,4%              |
| Corticosteroids              | 7 (1,4%)   | 3 (2,9%)     | 10 (1,7%)  | 30,0%              |
| Arbidol                      | 6 (1,2%)   | 2 (1,9%)     | 8 (1,3%)   | 25,0%              |
| Vitamin C                    | 2 (0,4%)   | 3 (2,9%)     | 5 (0,8%)   | 60,0%              |
| Oseltamivir                  | 5 (1,0%)   | 0 (0%)       | 5 (0,8%)   | 0%                 |
| Losartan                     | 4 (0,8%)   | 1 (1,0%)     | 5 (0,8%)   | 20,0%              |
| ACEs/ARBs                    | 2 (0,4%)   | 2 (1,9%)     | 4 (0,7%)   | 50,0%              |
| Ribavirin                    | 4 (0,8%)   | 0 (0%)       | 4 (0,7%)   | 0%                 |

498 All numbers are total counts. Percentages refer to the respective value of the row “Interventional  
 499 trials”. Data was extracted from the original database downloaded from the ICTRP and the original  
 500 registration record of each trial.

501

## 502 **Discussion**

### 503 **Key results and interpretation**

#### 504 **First objective: assessment of spatial and temporal evolution of clinical** 505 **research of COVID-19 across the globe**

506 Our key findings for this objective were: 1) The overall research activity was much higher than in any  
507 pandemic, epidemic or health crisis before. 2) China was the country with the most registered trials in  
508 total and per confirmed cases, however in terms of trials per population size, the Netherlands and  
509 France were leading. Looking at the evolution of the numbers from each country though, it appears  
510 that the number of trials per cases and population will align over time. 3) Our results suggest that  
511 declarations and warnings from institutions like the WHO did not have that much of an impact on the  
512 emergence of clinical research. Rather, clinical research might had been triggered by panic due to  
513 rising disease incidence.

514 1) Our initial sampling goal of 1000 registered trials was reached after only approximately 3 months  
515 while the current total number of registered trials (accessed 29<sup>th</sup> of June 2023) in the ICTRP related to  
516 COVID-19 was 15834. For other pandemics and epidemics, the total numbers of registered trials were  
517 significantly lower, e.g., H1N1 (n=509), Ebola (n=140), SARS (n=4053), MERS (n=21) and even  
518 HIV/Aids (n=11764). To put this into perspective, H1N1, Ebola and MERS combined did not have as  
519 many registered trials as we found for COVID-19 in the first 3 months.(11)

520 2) The temporal and spatial development of clinical research in the COVID-19 pandemic in general  
521 followed the spread of the disease, which was expected. China was the most dominant country with  
522 more than two thirds of all trials originating from there and leading on the number of trials per 100  
523 cases with 0,806 vs. Japan being second with 0,512 trials per 100 cases. Considering trials per  
524 population though, China was not as dominant as the previous numbers might imply with 0,465 trials  
525 per 1 million inhabitants vs. Netherlands with 0,8 and France with 0,682. Another trial which  
526 examined the characteristics of published scientific articles in the first 3 months of the COVID-19  
527 outbreak came to similar results with China having published more than half of the articles with  
528 50,5 % and 0,422 articles per 1 million inhabitants.(12) However, in terms of articles per 100 disease

529 cases, our study shows different results. In our study China registered third most trials per cases while  
530 China was in the bottom end of articles per cases in the opposed study. The opposed study took the  
531 number of confirmed cases from the 2<sup>nd</sup> of March 2020, before the COVID-19 situation was declared  
532 as a pandemic, while our designated date was set one month later on the 1<sup>st</sup> of April 2020 and after the  
533 declaration, which could explain the differences. Thus, in our study, the number of confirmed cases  
534 per country was significantly higher, especially in countries other than China due to the vast spread of  
535 the disease in March 2020, and thereby the differences in terms of trials per cases are smaller. Our  
536 results suggest that the numbers of trials per cases will continue to align over time, and thus China will  
537 only be standing out in the first few months of the COVID-19 outbreak.

538 3) Nevertheless, the fact that only 4,9 % of all trials before the pandemic declaration by the WHO  
539 originated from outside of China was still surprising, since the outbreak was declared “a public health  
540 emergency of international concern” one month prior to being officially declared a pandemic. One  
541 would have expected a more robust response at this time.(1) The graphical development of the  
542 cumulative cases and trials per date of each region could be an explanation for this. (Fig 3) We see that  
543 in all countries except China the number of cases began to increase dramatically only a few days  
544 before the declaration, which was then followed by a rapid growth of registered trials. In China on the  
545 other hand, the number of cases stagnated around the same time which was then followed by a  
546 flattening curve of registered trials. All in all, this raises the question of whether official declarations  
547 by the WHO or other institutions are influencing the start of research or whether panic due to the  
548 individual case numbers in each country are the main driver for research. Our findings, however,  
549 imply the latter.

550

## 551 **Second objective: assessment of transparency and quality – trial** 552 **registration**

553 Our key findings for this objective were: 1) There is a lack of transparency in trial registration  
554 expressed by retrospective registration and registration records not kept up to date with conflicting and  
555 invalid information being displayed. 2) The overall quality of trial registration seems to have improved  
556 since the introduction of the Trial Registration Data Set, yet there is still crucial information missing.

557 Trial registration is a crucial instrument which aims to ensure transparency, quality and validity of  
558 research and therefore prevent publications bias, reproducibility bias, and selective reporting bias. (7,  
559 13) Transparency of trial registration was defined as maintaining the trial registration records and  
560 updating them in a timely manner, to ensure that every information extracted from these records can  
561 be considered as valid and up to date. The quality of trial registration was assessed by screening each  
562 registration record for prospective registration and for completeness of the trial registration data set.

563 1) Prospective registration is an important tool to prevent selective reporting and publication bias. By  
564 making registration records a public matter before recruiting the first patient, it is very unlikely to alter  
565 the data to fit the results since every change to the protocol or record is publicly accessible. (7, 13, 14)  
566 This topic is also stated in the declaration of Helsinki with the words “Every research study involving  
567 human subjects must be registered in a publicly accessible database before recruitment of the first  
568 subject”.(15) The ICMJE therefore requires prospective registration from every clinical trial initiated  
569 after July 1, 2005 in order to be considered for publication in any of their member journals.(16).  
570 Though, several studies concluded that retrospective registration and thus the possibility of publication  
571 and selective reporting bias is still present.(17, 18) One study, which analyzed all trials registered in  
572 the ANZCTR from 2006 to 2015, came to the result that the number of prospectively registered trials  
573 increased from 42 % in 2006 to 63 % in 2012 and plateaued from thereon.(19) Our study came to  
574 similar results with one third of all trials being registered retrospectively. Particularly problematic is  
575 the fact that we identified 15 trials which were registered retrospectively after the recruitment was  
576 already completed. Although other studies suggest that the number of trials which are being registered  
577 retrospectively appear to decrease, there is still a lot of work to do. If retrospective registration exists,  
578 selective reporting and publication bias will be a reoccurring problem. Registries and especially  
579 journals are in need follow the ICMJE rules more strictly by no longer accepting and publishing  
580 studies that were registered retrospectively to overcome this issue.

581 Keeping trial records up to date is another very important aspect of trial registration. To enforce this,  
582 all primary and partner registries in the WHO Registry Network signed a form which endeavors to  
583 keep registered information up-to-date, some registries even implemented reminder systems to  
584 facilitate this by notifying the authors at least every 6 months if there was no update.(20) To our

585 knowledge this is the first study which conducted a follow-up to track the progression of trial  
586 registration records over time to evaluate the accuracy and validity of the information being displayed.  
587 We discovered that two thirds of the trials haven't been updated accordingly and a quarter of all trials  
588 have never been updated after two years since their registration. Particularly unfortunate is the fact that  
589 more than half of all trials which already published results were not even labelled as completed. One  
590 of the goals of trial registration is that the public and scientific community can consider every  
591 information and data displayed as accurate and valid. If this is not ensured for arguably one of the  
592 most important and fundamental information in trial registration, i.e., the recruitment status, the whole  
593 concept of trial registration is to be questioned.

594 2) The Trial Registration Data Set (TRDS), which was designed by the WHO and is required by the  
595 ICMJE, represents another tool to ensure transparency, quality and validity in clinical research and  
596 trial registration by providing a minimum set of items each trial record has to display in order to be  
597 considered adequate and eligible for publication.(21) To ensure this and to further conquer publication  
598 and reproducibility bias, it is crucial that the information of several key items (i.e. interventions,  
599 contact information, study type) is informative and complete. Though, our results showed that there  
600 were several items with a high rate of missing or insufficient information, e.g., Item 13 (interventions)  
601 with 43,9 %, Item 21 (ethics review) with 40,2 % and Item 15 (study type) with 22,4 %. Also, only  
602 26/139 (18,7 %) trials displayed Item 13 (summary results) sufficiently and either provided a link or a  
603 summarization for already published results. We also detected differences between the registries on  
604 which items are missing most often. The ChiCTR for example displayed insufficient information for  
605 item 13 (interventions) in 61 % and for item 15 (study type) in 40,9 % of all their records, while  
606 ClinicalTrials.gov was missing Item 21 (ethics review) in 97,1 % of their registration records and item  
607 7 and 8 (contact for public and scientific queries) in 44,8 %. One study, which took a random sample  
608 of 439 records registered between 2008 and 2009 from the ICTRP and assessed those in terms of their  
609 contact, intervention and primary outcome information, found that 32,3 % of the trials have not  
610 provided sufficient contact information and only 44,2 % provided sufficient information on  
611 interventions.(22) Another study conducted by the same authors 4 years later with the same design  
612 found that 15,1 % of the trials have not provided sufficient contact information and only 51,9 %

613 provided sufficient information on interventions.(23) In our study only 3,9 % trials were completely  
614 missing the contact information of which all were registered on ClinicalTrials.gov. The differences  
615 regarding the contact information can be explained with the fact that in our study ClinicalTrials.gov is  
616 underrepresented with 35,1 % of all trials being registered on this register compared to 85,9 %  
617 respectively 57,5 % in their studies. Results from another study in 2009 which assessed the whole data  
618 set (at that time only 20 items) showed a much higher rate of missing information for nearly every  
619 item. (24) Since these studies depict rather the early years after trial registration was implemented, our  
620 findings also suggest that there was an overall improvement in registration quality over time, yet some  
621 key items like interventions have been and still are missing critical information. These suggestions  
622 meet the results from two recent studies which assessed the quality of trial records investigating  
623 Traditional Chinese Medicine. The authors concluded that especially the complex items like  
624 interventions, study design and primary outcomes were missing crucial information. (25, 26)  
625 Although, the implementation of trial registration and therefore compliance with the TRDS was  
626 advocated over 17 years ago, there is evidently still a huge lack of quality and transparency. To  
627 conquer publication bias, selective reporting bias and reproducibility bias, institutions like the WHO  
628 and the ICMJE, must work more closely with the registers, journals, and researchers to overcome  
629 these issues. As a possible solution for the differences between registers, lack of quality in trial  
630 registration and to ensure that the information is displayed equally, we suggest a unified item mask  
631 which each register must implement to be considered as a partner for the WHO Registry Network and  
632 be eligible for publication. This, however, must be enforced by the WHO and the ICMJE, as there is  
633 no need for registers to change if their trials are still being published.

634

### 635 **Third objective: assessment of research waste and redundancies**

636 Our key findings for this objective are: 1) The early stages of clinical research about COVID-19  
637 showed clear signs of research waste. Furthermore, research waste appears to be a reoccurring  
638 problem in the scientific world. 2) “Hype train phenomenon” in early stages of research assumingly  
639 due to a lack of dedicated supervising institutions and coordination which leads to unnecessary  
640 redundancies and ultimately to more research waste.

641 Research waste and redundancies in clinical research are significant problems that can have serious  
642 implications for the scientific community, as well as for the patients who participate in clinical trials.  
643 Research waste refers to the unnecessary use of resources including time, money, and other valuable  
644 resources. Research waste will therefore be measured by the rate of discontinuation and the quality of  
645 study design. Redundancies, on the other hand, occur when multiple studies are conducted on the same  
646 or similar topics, resulting in duplication of efforts and resources. To assess this issue, we screened all  
647 drug trials for their therapeutic agents to depict potential redundancies which would also lead to more  
648 research waste.

649 1) Discontinuation displays one source for wasting money, time, and other valuable resources. (27-29)  
650 Nearly 2 years after the last trial of our study was registered, we identified 17,3 % discontinued  
651 interventional trials. The most common reason for discontinuation was difficulties with enrolment of  
652 patients with 29,1 % trials. Discontinuation rates ranging from as low as 11 % and up to 43 % had  
653 been displayed in several other studies. Similar to our findings, the most common reason for  
654 discontinuation in all of those trials was difficulties with enrolment.(27, 28, 30-34) However, a  
655 systematic review from 2016 suggested that most reasons for recruitment failure could be anticipated  
656 in the planning phase of a trial and thus are preventable. The authors also provided a checklist to  
657 ensure that weak spots in study designs are being identified.(35) Since transparency is important to  
658 detect errors in the planning of studies and to prevent them in the future, it is even more problematic if  
659 no reason for discontinuation is given. Unfortunately, 39,8 % had not stated any reason for  
660 discontinuation. Even in discontinued trials, transparency is important to detect errors in the planning  
661 of trials and prevent those mistakes in the future by learning from one another.

662 Another important aspect to avoid research waste is an appropriate and robust study design. Although,  
663 more than two thirds of all interventional trials are designed as RCTs, which are mostly ranked on top  
664 of the evidence levels and hailed as the “gold-standard” of evidence-based-medicine, almost one third  
665 of trials used other designs, often without any control, which is ranked on the bottom of the evidence  
666 pyramid.(36) Further, even the RCTs have flaws in their design as nearly half of them were not  
667 masked which can lead to several bias such as selection bias, which was supposed to be eliminated by



668 the randomization itself.(37) We speculate that panic and the willingness to help may have driven  
669 these “short-cuts” in robustness.

670 2) To further avoid research waste, it is also important to create awareness for redundancies in clinical  
671 research. Trial registration was intended as a tool to diminish this by making planned and ongoing  
672 research available for the public and scientific world.

673 (Hydroxy)-chloroquine (HCQ/QC), as the most prominent example, gained huge popularity in the  
674 early months of COVID-19. However, the timeline of HCQ/QC showed contradicting information  
675 about the pros and cons of its therapeutic use against COVID-19 which was also influenced by the  
676 media and even leading politicians in effected countries.(38) The therapeutic use was halted when the  
677 US-FDA revoked its emergency authorization on June 15, 2020.(39) Early reviews from 2020  
678 supported this by indicating weak and conflicting evidence about the efficacy and safety of HCQ/CQ.  
679 (40-43) Throughout this evolution, there was always an urgent call for better designed and properly  
680 powered trials to gain unequivocal data safety and efficacy for HCQ/CQ usage in COVID-19. (41, 44)  
681 Though, our results show that 14 % of all interventional trials investigated the usage HCQ/CQ with  
682 more than a third (38,6 %) of those trials being discontinued before completion. This is not only an  
683 example for research waste and redundancies but also raises the question on whether numerous trials  
684 assessing the same topic operationally fragmented in isolated silo-structures fulfils the purpose of  
685 gaining more evidence. The given tools (e.g., trial registration and the registers itself) must be used  
686 more thoroughly to detect similar trials and encourage collaboration instead of conducting own trials  
687 one after the other without any coordination. This could not only help with the power of trials but  
688 could also lower the discontinuation rates by preventing recruitment failure through multicentric  
689 designs and thus also prevents unnecessary exposure to clinical trials for patients.

690

## 691 **Limitations**

692 The limitations of this study are the following:

693 1) Since the registered trials are updated on a regular weekly basis the data at the point of download  
694 from the WHO ICTRP search portal can be considered as up to date as of the 22<sup>nd</sup> of April, meaning  
695 all trials registered to this date were considered for inclusion in this study. Nevertheless, we cannot

696 rule out with complete certainty that no additional trials were added afterwards which could lead to a  
697 different number of included trials if the dataset was downloaded on another date. Also, we expect the  
698 data set to be different if downloaded now, since the trial registration protocols can be updated and  
699 changed and therefore the information displayed in the data set by the WHO will also be changed.

700 2) We only used the keyword “COVID-19” as a search criterion which could have biased our search  
701 outcome.

702 3) Since our objective was to observe and analyze the first surge of clinical research and our goal of  
703 1000 registered trials was already exceeded on the 1<sup>st</sup> of April 2020, we only cover a small period. Our  
704 findings therefore only describe the early stages of this pandemic, i.e., the initial “chaos phase” and are  
705 definitively not generalizable to the entire pandemic.

706 4) As this study only evaluates the quality and validity of the registration records, we do not presume  
707 to make any statement about the ultimate quality of the trials itself. Further studies must assess  
708 whether the quality deficiencies we have identified in the records are carried through to publication.

709 5) Including a larger number of clinical trials would have allowed a better inside but we deliberately  
710 chose to only assess the early stages of such a situation. It would be interesting to investigate if the  
711 results of this analysis changed along the pandemic.

712

## 713 **Conclusion**

714 To our knowledge, this is the first study which examined the quality of trial registration in the early  
715 “chaos phase” of the COVID-19 pandemic and the first study which conducted a follow-up to assess  
716 the development of the recruitment status of registration records. The temporal and spatial evolution of  
717 clinical research turned out as expected. China, being the country the virus originated from, was the  
718 first country to start clinical research and was overall the country with the most registered trials in the  
719 first months of the pandemic. The spread of the disease was also accompanied by emerging trials from  
720 other countries, and it appears that official pandemic declarations from institutions like the WHO have  
721 less impact on the uprising of research than the number of cases in each country. While the  
722 information of trial records is easily available and accessible for everybody, we detected a huge lack of  
723 quality and validity, which is not due to the pandemic situation but rather a general problem. With the

724 data we found and the experience we gathered while examining the trial records, we highly doubt the  
725 meaningfulness and benefit of trial registration in its current form, especially for rapidly evolving  
726 situations across global geographies and language zones. If the information is incomplete, not up-to-  
727 date and registered retrospectively, the usefulness is not given. Registries will therefore only be used  
728 for mandatory registration and thus are deprived from other important functions: 1) facilitating  
729 recruitment by creating awareness for researchers and possible participants about recruiting trials 2)  
730 enabling and improving collaboration between researchers 3) identifying gaps in clinical research 4)  
731 avoiding redundancies by identifying similar trials 5) reducing research waste by identifying potential  
732 problems in study design. Especially in the “scientific chaos phase” of an emerging pandemic like  
733 COVID-19, these functions can be of tremendous help by being an organizer of chaos and therefore  
734 reducing information overload and research waste. Advocating and emphasizing these functions can  
735 furthermore help in the early stages of future pandemics and epidemics by preventing chaos and panic  
736 before it even emerges. An important mission of the WHO is to break the “panic-then-forget” cycle in  
737 future health crisis.(45) The scientific response proved to be intact. Many colleagues all over world  
738 fought the pandemic with dedication, bravery, and sacrifices, but as Dr. Mike Ryan from the WHO  
739 stated: “Preparation is the most active act in public health, not response. Preparation is response, and  
740 we make a false separation between these concepts.”(45, 46) Scientific communication and  
741 coordination tools such as clinical trials registry tools - if kept current and accurate - are valuable  
742 instruments to strengthen societal resiliency in global, medical disaster situations. Appropriate disaster  
743 preparation implies that these systems be optimized - taking our findings and suggestions for  
744 improvement into account - before the next disaster strikes.(47, 48)

745 We believe that the WHO in cooperation with the ICMJE can have the most impact on improving  
746 quality and usefulness of trial registration as they define the requirements for registration and  
747 publication.

748

## 749 **Acknowledgments**

750 This research article is part of Till Adamis doctoral thesis.

751

## 752 **References:**

753

- 754 1. World Health Organization. WHO Director-General's opening remarks at the media  
755 briefing on COVID-19 - 11 March 2020: WHO; [cited 2023 31 March]. Available from:  
756 <https://www.who.int/director-general/speeches/detail/who-director-general-s-opening-remarks-at-the-media-briefing-on-covid-19---11-march-2020>.  
757
- 758 2. World Health Organization. Statement on the second meeting of the International  
759 Health Regulations (2005) Emergency Committee regarding the outbreak of novel  
760 coronavirus (2019-nCoV): WHO; [cited 2023 16 March]. Available from:  
761 [https://www.who.int/news/item/30-01-2020-statement-on-the-second-meeting-of-the-international-health-regulations-\(2005\)-emergency-committee-regarding-the-outbreak-of-novel-coronavirus-\(2019-ncov\)](https://www.who.int/news/item/30-01-2020-statement-on-the-second-meeting-of-the-international-health-regulations-(2005)-emergency-committee-regarding-the-outbreak-of-novel-coronavirus-(2019-ncov)).  
762  
763
- 764 3. World Health Organization. ICTRP Registered Trials, Keyword „COVID-19“: WHO;  
765 [cited 2023 29 June]. Available from: <https://trialsearch.who.int>.
- 766 4. Ries M. Global key concepts of civil-military cooperation for disaster management in  
767 the COVID-19 pandemic-A qualitative phenomenological scoping review. *Front Public*  
768 *Health*. 2022;10:975667.
- 769 5. Baker MS. Creating Order from Chaos: Part I: Triage, Initial Care, and Tactical  
770 Considerations in Mass Casualty and Disaster Response. *Military Medicine*.  
771 2007;172(3):232-6.
- 772 6. Schulze C, Welker A, Kühn A, Schwertz R, Otto B, Moraldo L, et al. Public Health  
773 Leadership in a VUCA World Environment: Lessons Learned during the Regional Emergency  
774 Rollout of SARS-CoV-2 Vaccinations in Heidelberg, Germany, during the COVID-19  
775 Pandemic. *Vaccines*. 2021;9(8):887.
- 776 7. World Health Organization. Trial registration: WHO; [cited 2023 15 March].  
777 Available from: <https://www.who.int/clinical-trials-registry-platform/network/trial-registration>.  
778
- 779 8. World Health Organization. WHO Registry Criteria: WHO; [cited 2023 16 March].  
780 Available from: <https://www.who.int/clinical-trials-registry-platform/network/registry-criteria>.  
781
- 782 9. World Health Organization. WHO Trial Registration Data Set: WHO; [cited 2023 16  
783 March]. Available from: <https://www.who.int/clinical-trials-registry-platform/network/who-data-set>.  
784
- 785 10. World Health Organization. ICTRP Registry Network: WHO; [cited 2023 17 March].  
786 Available from: <https://www.who.int/ictip/network/en/>.
- 787 11. World Health Organization. ICTRP Registered Trials, Keywords „H1N1“ OR „Ebola“  
788 OR „HIV“ OR „AIDS“ OR „MERS“ OR „SARS“: WHO; [cited 2023 07 March]. Available  
789 from: <https://trialsearch.who.int>.
- 790 12. Di Girolamo N, Meursing Reynders R. Characteristics of scientific articles on  
791 COVID-19 published during the initial 3 months of the pandemic. *Scientometrics*.  
792 2020;125(1):795-812.
- 793 13. Abaid LN, Grimes DA, Schulz KF. Reducing Publication Bias Through Trial  
794 Registration. *Obstetrics & Gynecology*. 2007;109(6):1434-7.
- 795 14. Harvey LA. Trial registration: a pre-requisite for publication and an ethical  
796 responsibility. *Spinal Cord*. 2017;55(4):329-30.
- 797 15. World Medical Association. WMA DECLARATION OF HELSINKI – ETHICAL  
798 PRINCIPLES FOR MEDICAL RESEARCH INVOLVING HUMAN SUBJECTS: WMA;

- 799 [cited 2023 16 March]. Available from: [https://www.wma.net/policies-post/wma-declaration-](https://www.wma.net/policies-post/wma-declaration-of-helsinki-ethical-principles-for-medical-research-involving-human-subjects/)  
800 [of-helsinki-ethical-principles-for-medical-research-involving-human-subjects/](https://www.wma.net/policies-post/wma-declaration-of-helsinki-ethical-principles-for-medical-research-involving-human-subjects/).
- 801 16. International Committee of Medical Journal Editors. Clinical Trials Registration:  
802 ICMJE; [cited 2023 28 March 2023]. Available from: [https://www.icmje.org/about-](https://www.icmje.org/about-icmje/faqs/clinical-trials-registration/)  
803 [icmje/faqs/clinical-trials-registration/](https://www.icmje.org/about-icmje/faqs/clinical-trials-registration/).
- 804 17. Dal-Ré R, Ross JS, Marušić A. Compliance with prospective trial registration  
805 guidance remained low in high-impact journals and has implications for primary end point  
806 reporting. *Journal of Clinical Epidemiology*. 2016;75:100-7.
- 807 18. Gopal AD, Wallach JD, Aminawung JA, Gonsalves G, Dal-Ré R, Miller JE, et al.  
808 Adherence to the International Committee of Medical Journal Editors' (ICMJE) prospective  
809 registration policy and implications for outcome integrity: a cross-sectional analysis of trials  
810 published in high-impact specialty society journals. *Trials*. 2018;19(1):448.
- 811 19. Hunter KE, Seidler AL, Askie LM. Prospective registration trends, reasons for  
812 retrospective registration and mechanisms to increase prospective registration compliance:  
813 descriptive analysis and survey. *BMJ Open*. 2018;8(3):e019983.
- 814 20. World Health Organization. Primary registries in the WHO registry network: WHO;  
815 [cited 2023 16 March]. Available from: [https://www.who.int/clinical-trials-registry-](https://www.who.int/clinical-trials-registry-platform/network/primary-registries)  
816 [platform/network/primary-registries](https://www.who.int/clinical-trials-registry-platform/network/primary-registries).
- 817 21. International Committee of Medical Journal Editors. Clinical Trials: ICMJE; 2023  
818 [cited 2023 29 March]. Available from:  
819 [https://www.icmje.org/recommendations/browse/publishing-and-editorial-issues/clinical-trial-](https://www.icmje.org/recommendations/browse/publishing-and-editorial-issues/clinical-trial-registration.html)  
820 [registration.html](https://www.icmje.org/recommendations/browse/publishing-and-editorial-issues/clinical-trial-registration.html).
- 821 22. Viergever RF, Ghersi D. The Quality of Registration of Clinical Trials. *PLOS ONE*.  
822 2011;6(2):e14701.
- 823 23. Viergever RF, Karam G, Reis A, Ghersi D. The Quality of Registration of Clinical  
824 Trials: Still a Problem. *PLOS ONE*. 2014;9(1):e84727.
- 825 24. Moja LP, Moschetti I, Nurbhai M, Compagnoni A, Liberati A, Grimshaw JM, et al.  
826 Compliance of clinical trial registries with the World Health Organization minimum data set:  
827 a survey. *Trials*. 2009;10(1):56.
- 828 25. Kuang Z, Li X, Cai J, Chen Y, Qiu X, Ni X, et al. Calling for improved quality in the  
829 registration of traditional Chinese medicine during the public health emergency: a survey of  
830 trial registries for COVID-19, H1N1, and SARS. *Trials*. 2021;22(1):188.
- 831 26. Liu X, Li Y, Yu X, Feng J, Zhong X, Yang X, et al. Assessment of registration quality  
832 of trials sponsored by China. *Journal of Evidence-Based Medicine*. 2009;2(1):8-18.
- 833 27. Chapman SJ, Shelton B, Mahmood H, Fitzgerald JE, Harrison EM, Bhangu A.  
834 Discontinuation and non-publication of surgical randomised controlled trials: observational  
835 study. *BMJ : British Medical Journal*. 2014;349:g6870.
- 836 28. Kasenda B, von Elm E, You J, Blümle A, Tomonaga Y, Saccilotto R, et al.  
837 Prevalence, Characteristics, and Publication of Discontinued Randomized Trials. *JAMA*.  
838 2014;311(10):1045-52.
- 839 29. Yilmaz T, Jutten RJ, Santos CY, Hernandez KA, Snyder PJ. Discontinuation and  
840 nonpublication of interventional clinical trials conducted in patients with mild cognitive  
841 impairment and Alzheimer's disease. *Alzheimer's & Dementia: Translational Research &*  
842 *Clinical Interventions*. 2018;4(1):161-4.
- 843 30. Khan MS, Shahid I, Asad N, Greene SJ, Khan SU, Doukky R, et al. Discontinuation  
844 and non-publication of heart failure randomized controlled trials: a call to publish all trial  
845 results. *ESC Heart Fail*. 2021;8(1):16-25.
- 846 31. Rosenthal R, Kasenda B, Dell-Kuster S, von Elm E, You J, Blümle A, et al.  
847 Completion and Publication Rates of Randomized Controlled Trials in Surgery: An Empirical  
848 Study. *Annals of Surgery*. 2015;262(1):68-73.

- 849 32. Schroen AT, Petroni GR, Wang H, Gray R, Wang XF, Cronin W, et al. Preliminary  
850 evaluation of factors associated with premature trial closure and feasibility of accrual  
851 benchmarks in phase III oncology trials. *Clin Trials*. 2010;7(4):312-21.
- 852 33. Tiefenbach J, Park JJ, Demetriades AK. Trial Discontinuation and Publication  
853 Outcome:Resource Wastage in Low Back Pain Research. *Spine*.  
854 9900:10.1097/BRS.0000000000004524.
- 855 34. Traxler BD, Rucker BM, Greenough MC, Sajjadi NB, Hartwell M. Influence of the  
856 COVID-19 Pandemic on Clinical Trial Discontinuation in Anesthesiology: Cross-sectional  
857 Analysis. *JMIR Perioper Med*. 2022;5(1):e34936.
- 858 35. Briel M, Olu KK, von Elm E, Kasenda B, Alturki R, Agarwal A, et al. A systematic  
859 review of discontinued trials suggested that most reasons for recruitment failure were  
860 preventable. *Journal of Clinical Epidemiology*. 2016;80:8-15.
- 861 36. Burns PB, Rohrich RJ, Chung KC. The levels of evidence and their role in evidence-  
862 based medicine. *Plast Reconstr Surg*. 2011;128(1):305-10.
- 863 37. Viera AJ, Bangdiwala SI. Eliminating bias in randomized controlled trials: importance  
864 of allocation concealment and masking. *Fam Med*. 2007;39(2):132-7.
- 865 38. Ries M. The COVID-19 Infodemic: Mechanism, Impact, and Counter-  
866 Measures&mdash;A Review of Reviews. *Sustainability*. 2022;14(5):2605.
- 867 39. Manivannan E, Karthikeyan C, Moorthy NSHN, Chaturvedi SC. The Rise and Fall of  
868 Chloroquine/Hydroxychloroquine as Compassionate Therapy of COVID-19. *Frontiers in*  
869 *Pharmacology*. 2021;12.
- 870 40. Hernandez AV, Roman YM, Pasupuleti V, Barboza JJ, White CM.  
871 Hydroxychloroquine or Chloroquine for Treatment or Prophylaxis of COVID-19. *Annals of*  
872 *Internal Medicine*. 2020;173(4):287-96.
- 873 41. Cortegiani A, Ingoglia G, Ippolito M, Giarratano A, Einav S. A systematic review on  
874 the efficacy and safety of chloroquine for the treatment of COVID-19. *Journal of Critical*  
875 *Care*. 2020;57:279-83.
- 876 42. Altulea D, Maassen S, Baranov MV, van den Bogaart G. What makes  
877 (hydroxy)chloroquine ineffective against COVID-19: insights from cell biology. *Journal of*  
878 *Molecular Cell Biology*. 2021;13(3):175-84.
- 879 43. Sturrock BR, Chevassut TJ. Chloroquine and COVID-19 – a potential game changer?  
880 *Clinical Medicine*. 2020;20(3):278-81.
- 881 44. Ferner RE, Aronson JK. Chloroquine and hydroxychloroquine in covid-19. *BMJ*.  
882 2020;369:m1432.
- 883 45. World Health O. Sustainable preparedness for health security and resilience: adopting  
884 a whole-of-society approach and breaking the “panic-then-forget” cycle: meeting report: side  
885 event, 75th Session of the United Nations General Assembly, 1 October 2020. Geneva: World  
886 Health Organization; 2020 2020.
- 887 46. World Health Organization. Health and Care Worker Deaths during COVID-19:  
888 WHO; [cited 2023 09 July]. Available from: [https://www.who.int/news/item/20-10-2021-  
889 health-and-care-worker-deaths-during-covid-19](https://www.who.int/news/item/20-10-2021-health-and-care-worker-deaths-during-covid-19).
- 890 47. Brennenstuhl H, Will M, Ries E, Mechler K, Garbade S, Ries M. Patterns of extreme  
891 temperature-related catastrophic events in Europe including the Russian Federation: a cross-  
892 sectional analysis of the Emergency Events Database. *BMJ Open*. 2021;11(6):e046359.
- 893 48. Ries M, Zielonka M, Ries N, Breil T, Garbade S, Mechler K. Disasters in Germany  
894 and France: An Analysis of the Emergency Events Database From a Pediatric Perspective.  
895 *Disaster Med Public Health Prep*. 2019;13(5-6):958-65.

## 898 **Supporting information**

899 **S1 Supporting information. STROBE-Statement checklist**

900 **S2 Supporting information. Trial Registration Data Set items**

**PRISMA-flow chart of trial selection**

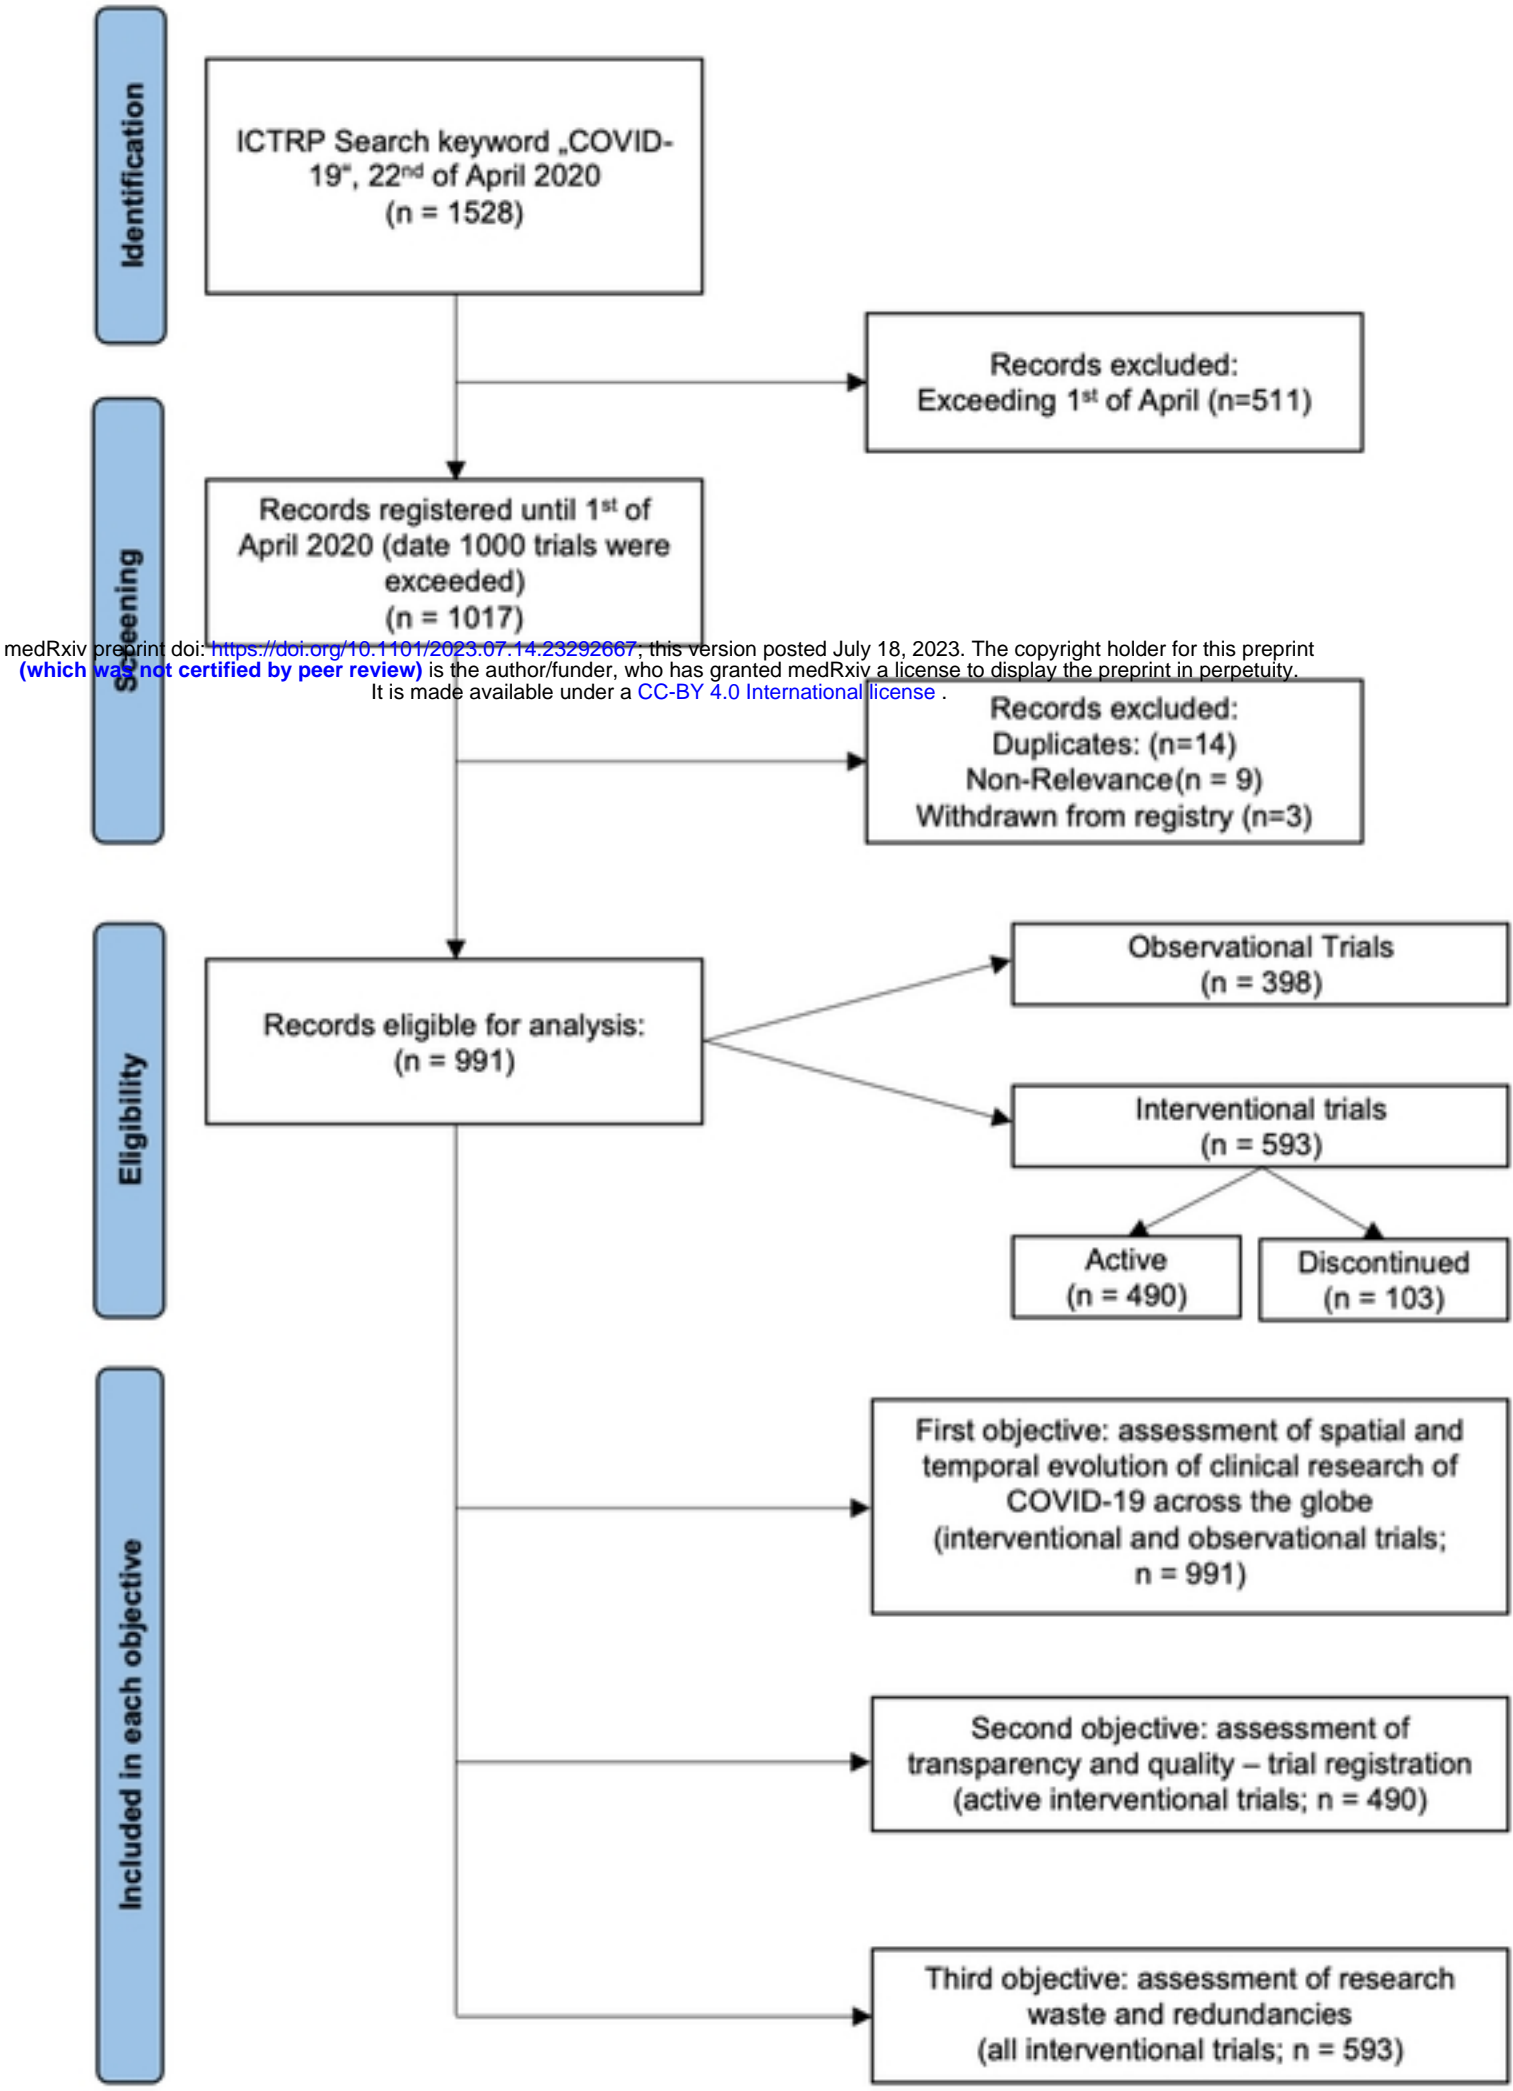

medRxiv preprint doi: <https://doi.org/10.1101/2023.07.14.23292667>; this version posted July 18, 2023. The copyright holder for this preprint (which was not certified by peer review) is the author/funder, who has granted medRxiv a license to display the preprint in perpetuity. It is made available under a [CC-BY 4.0 International license](https://creativecommons.org/licenses/by/4.0/).

Fig1



# Cumulative Trials China vs. Rest of the World

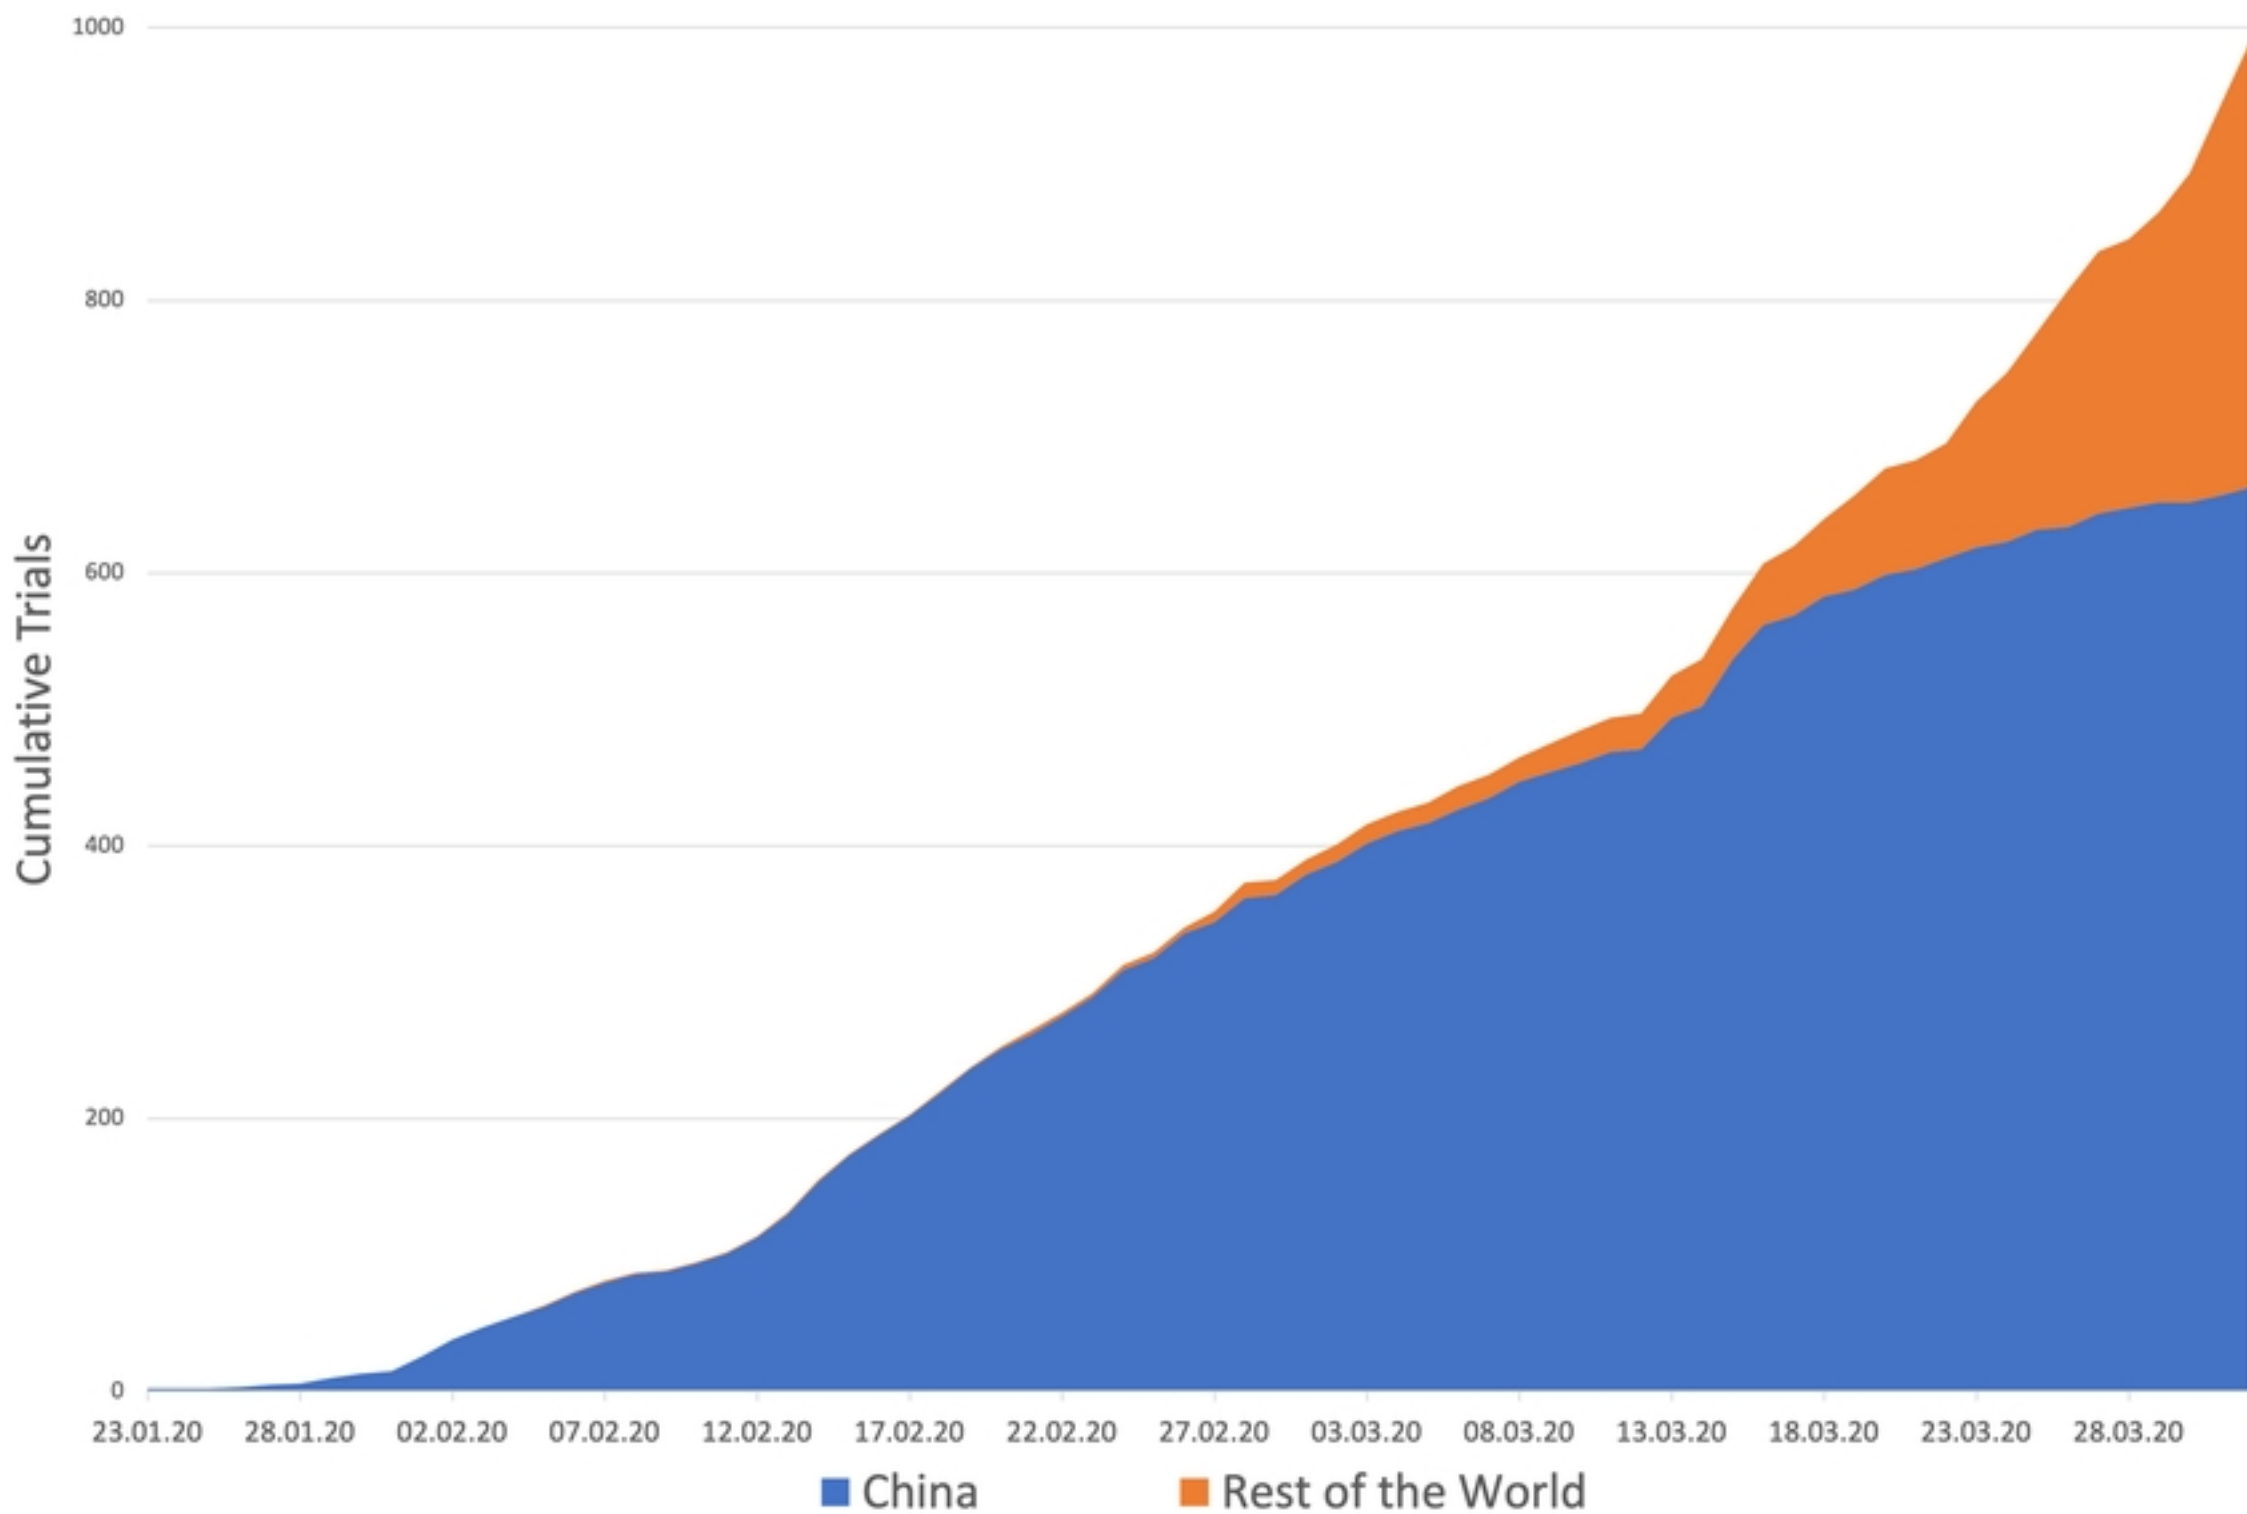

Fig2

# Cumulative Cases vs. Trials China

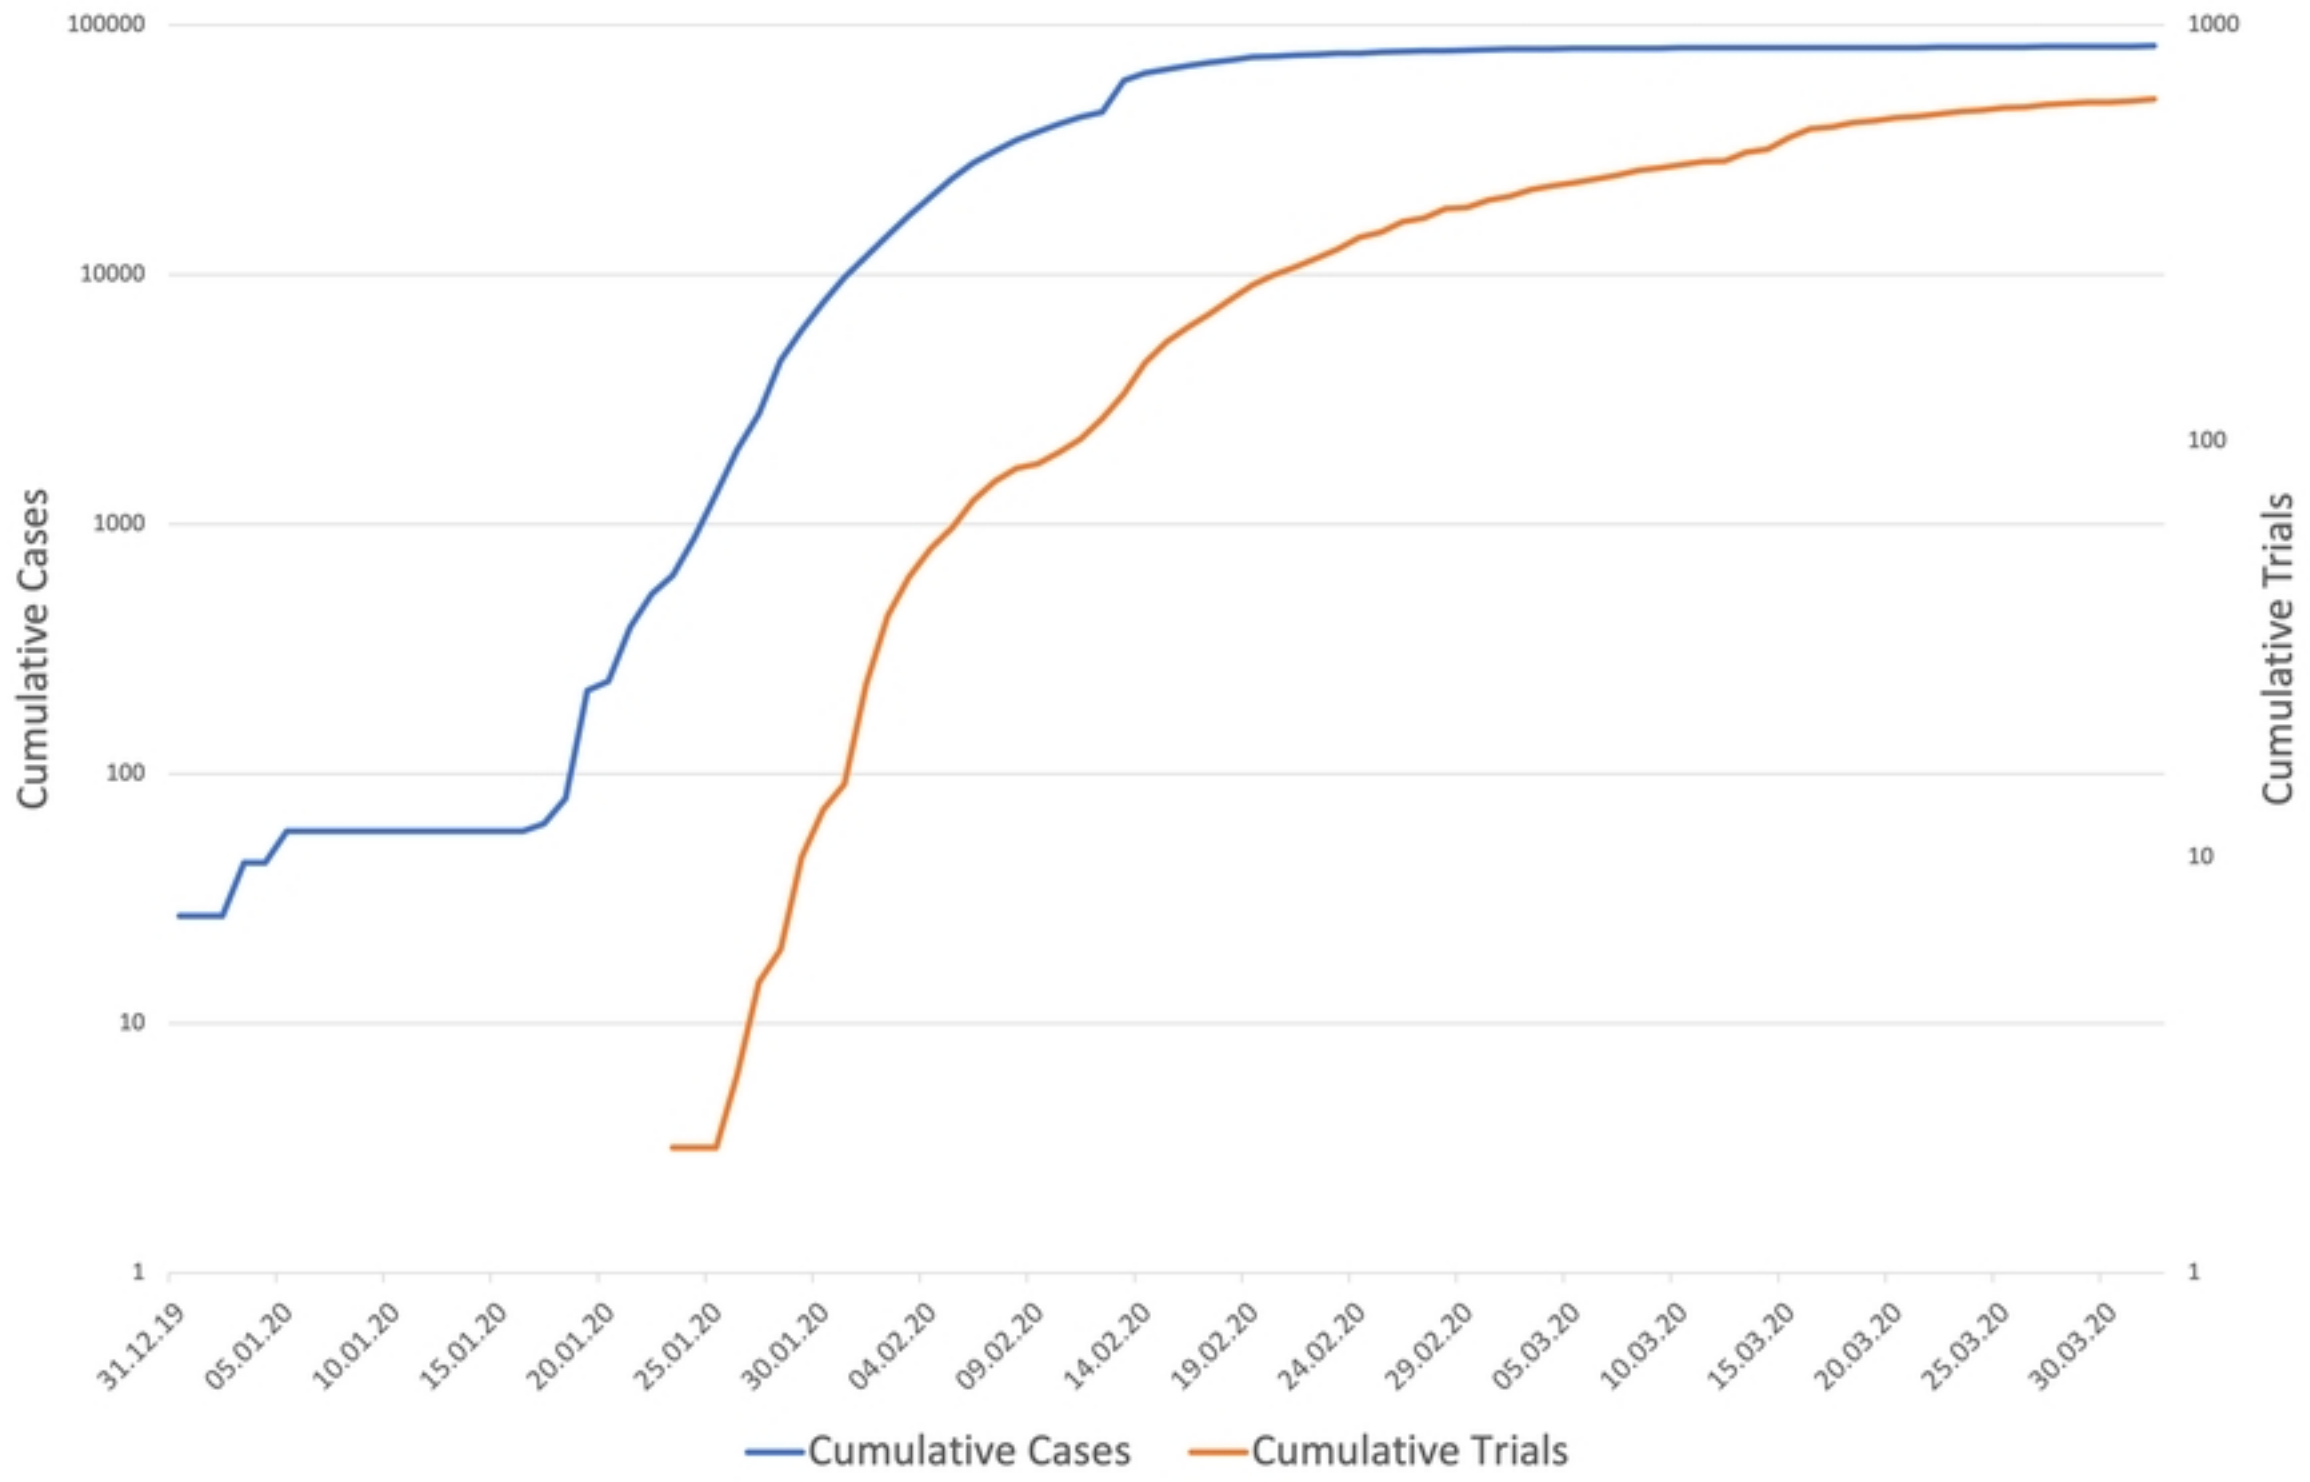

Fig3

# Cumulative Cases vs. Trials US

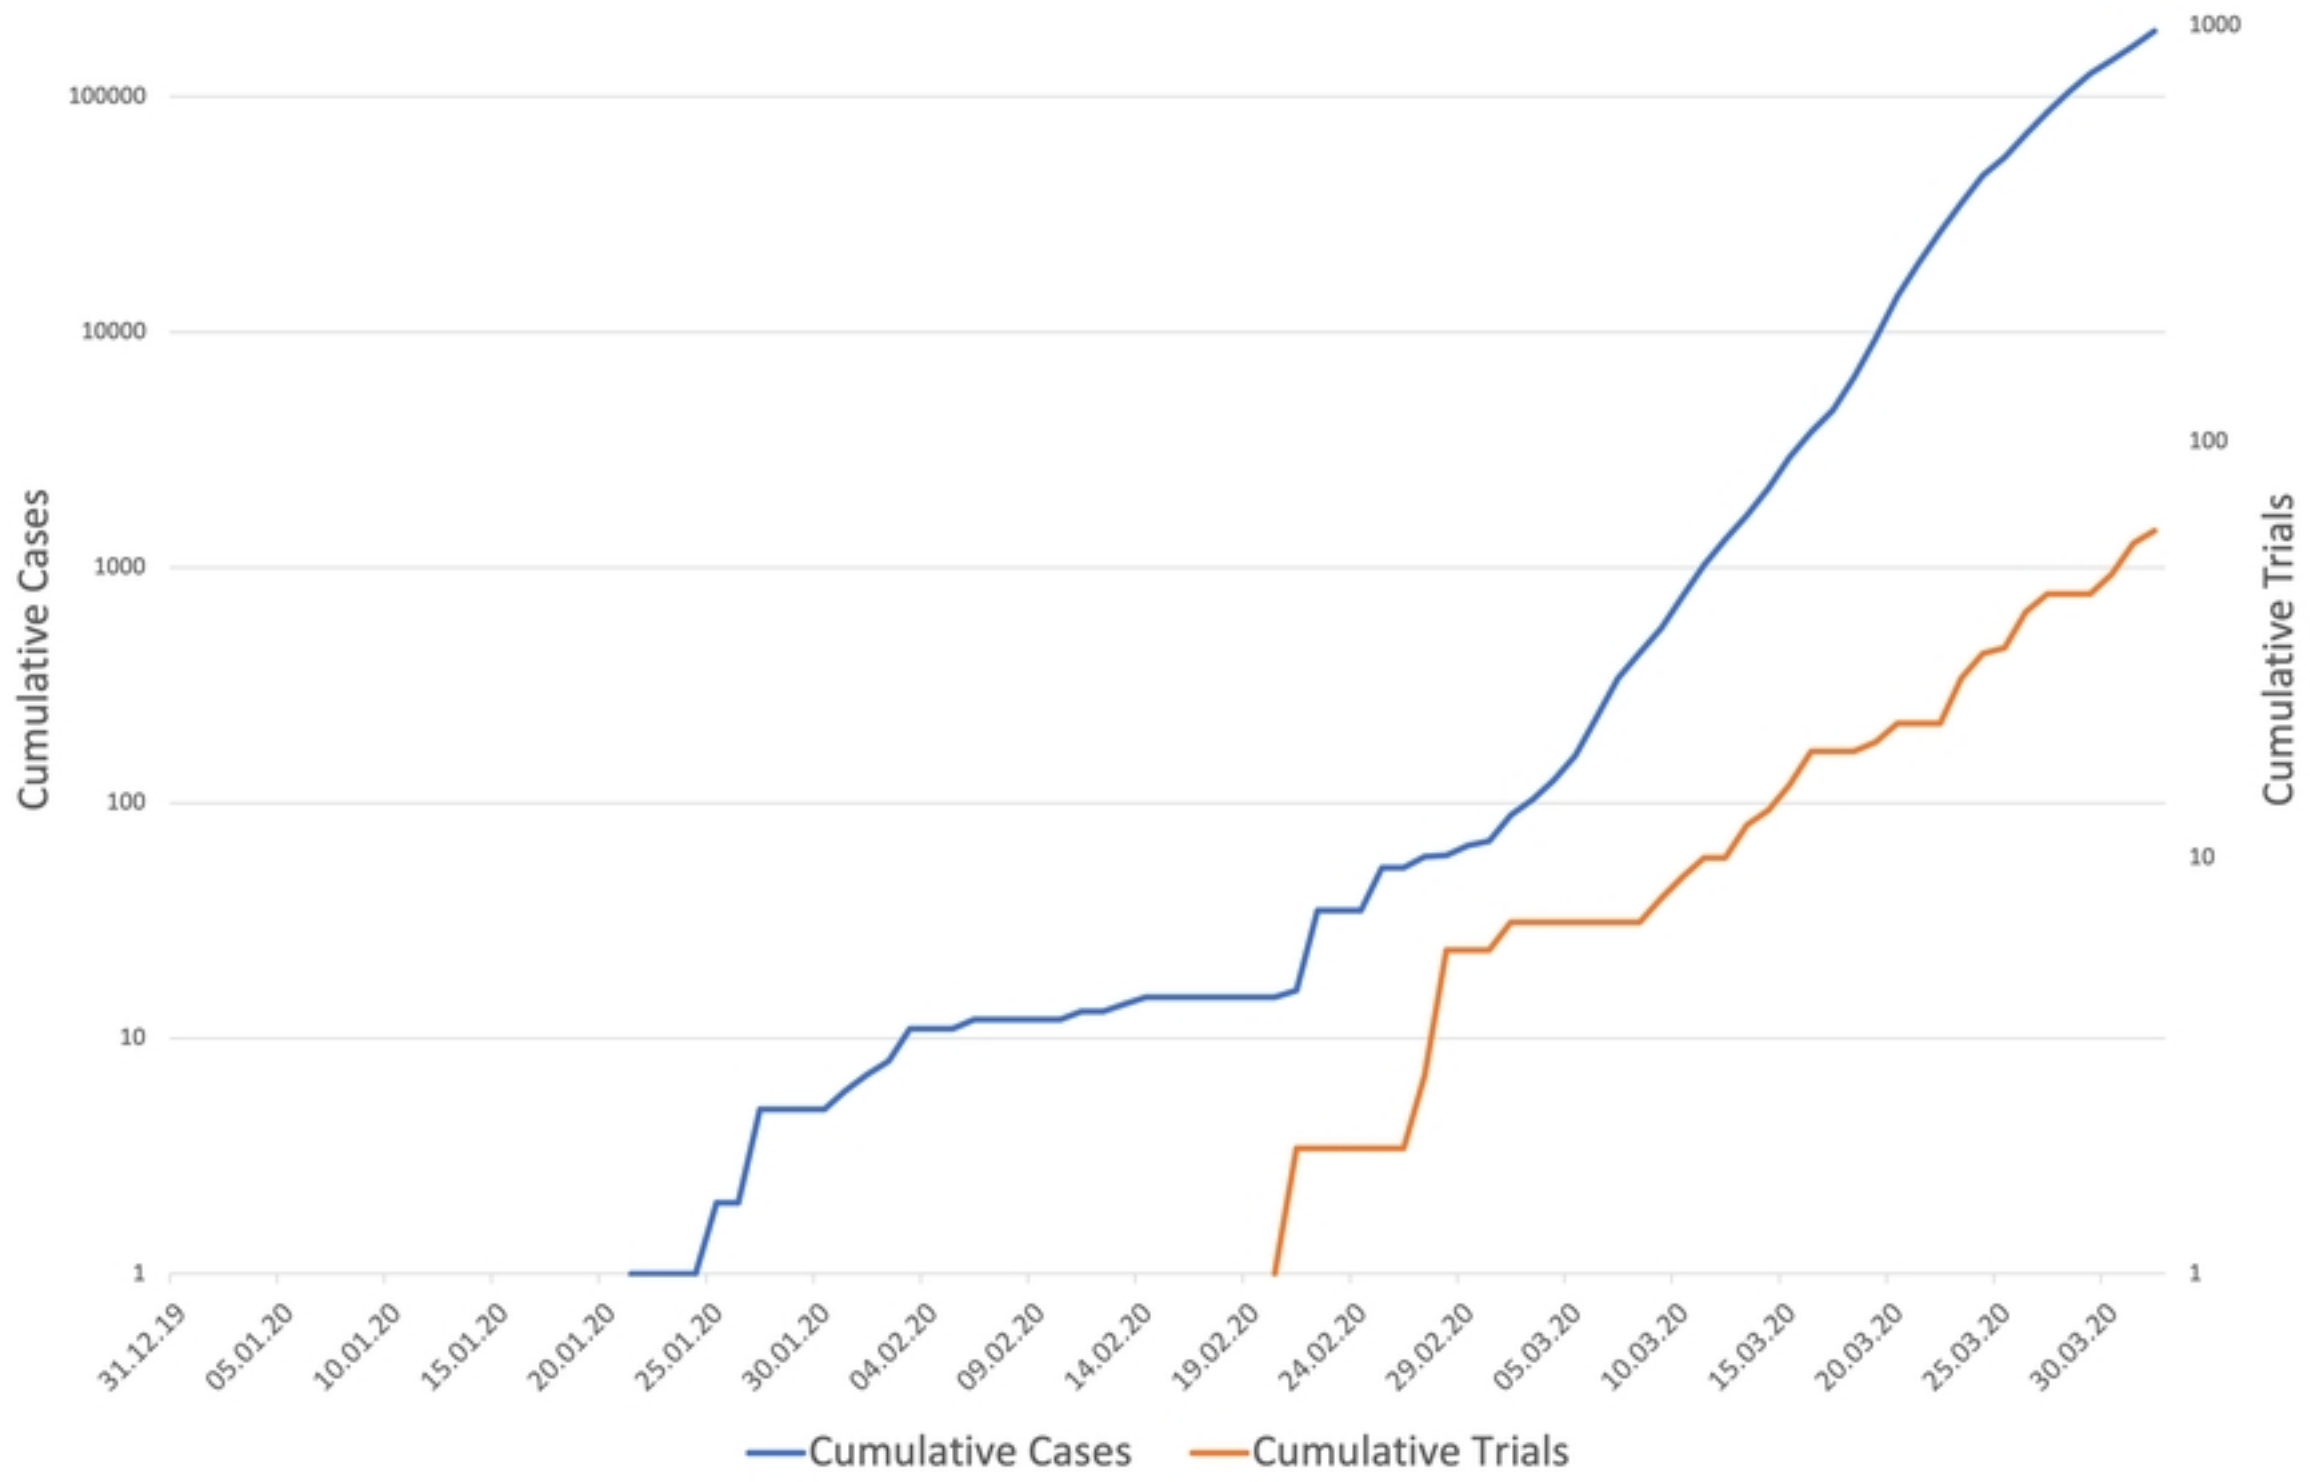

Fig4

# Cumulative Cases vs. Trials France

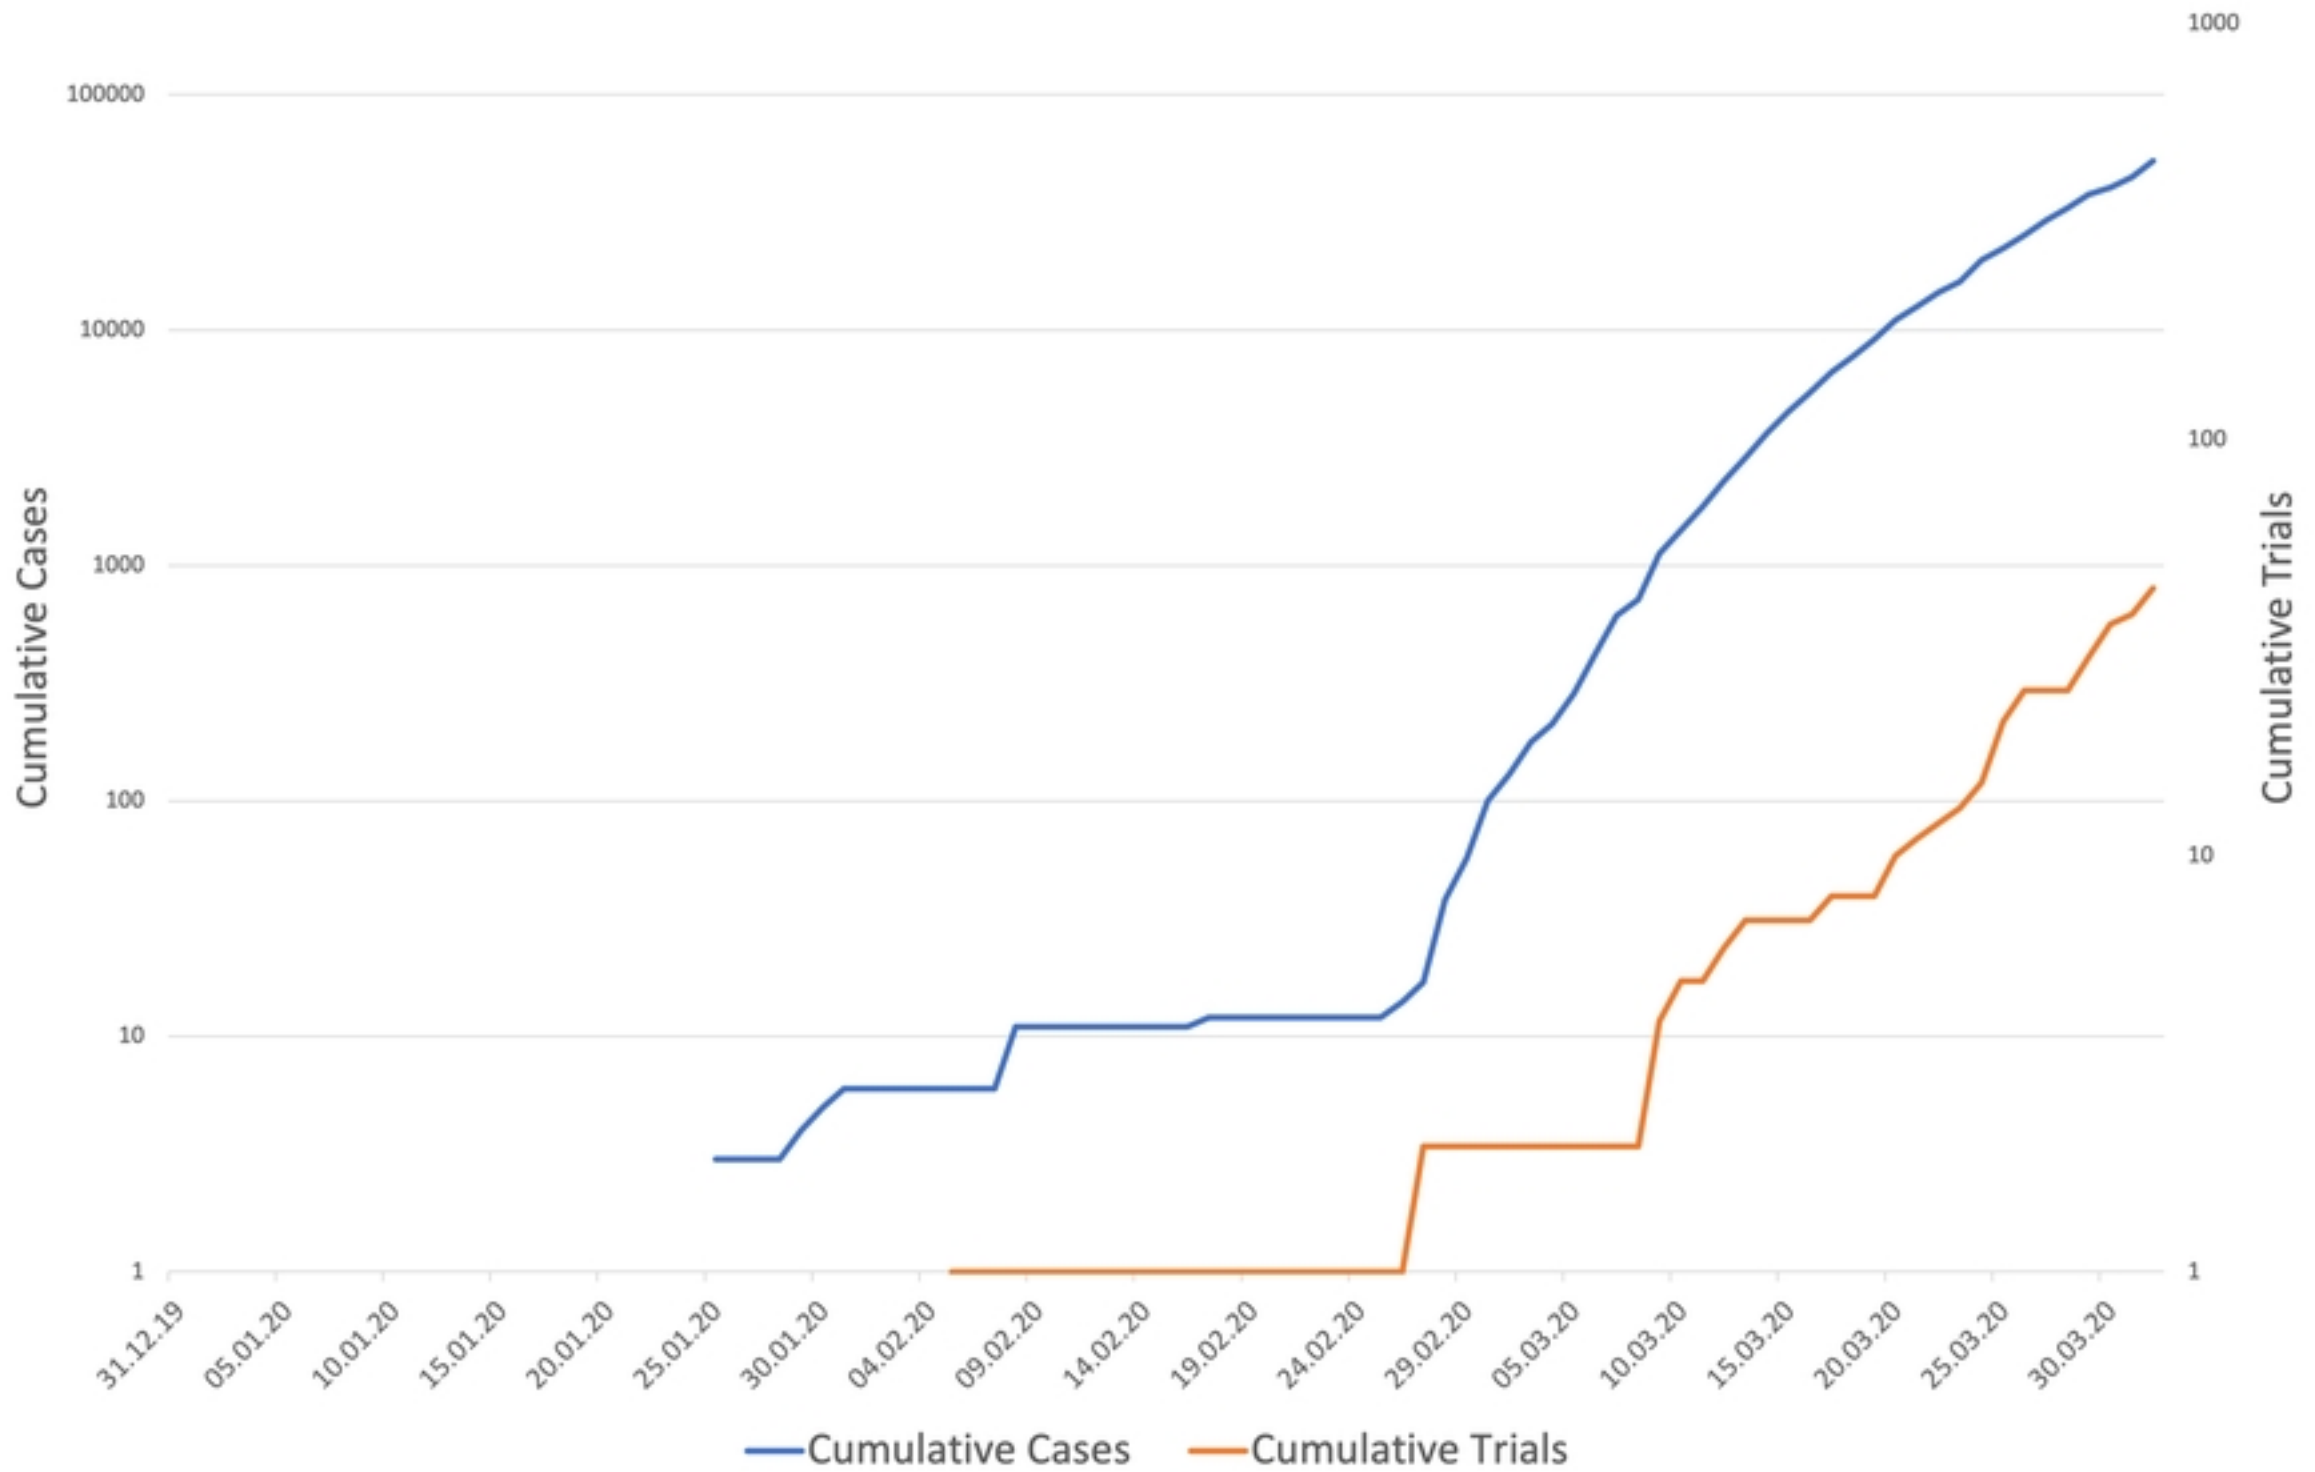

Fig5

# Cumulative Cases vs. Trials Iran

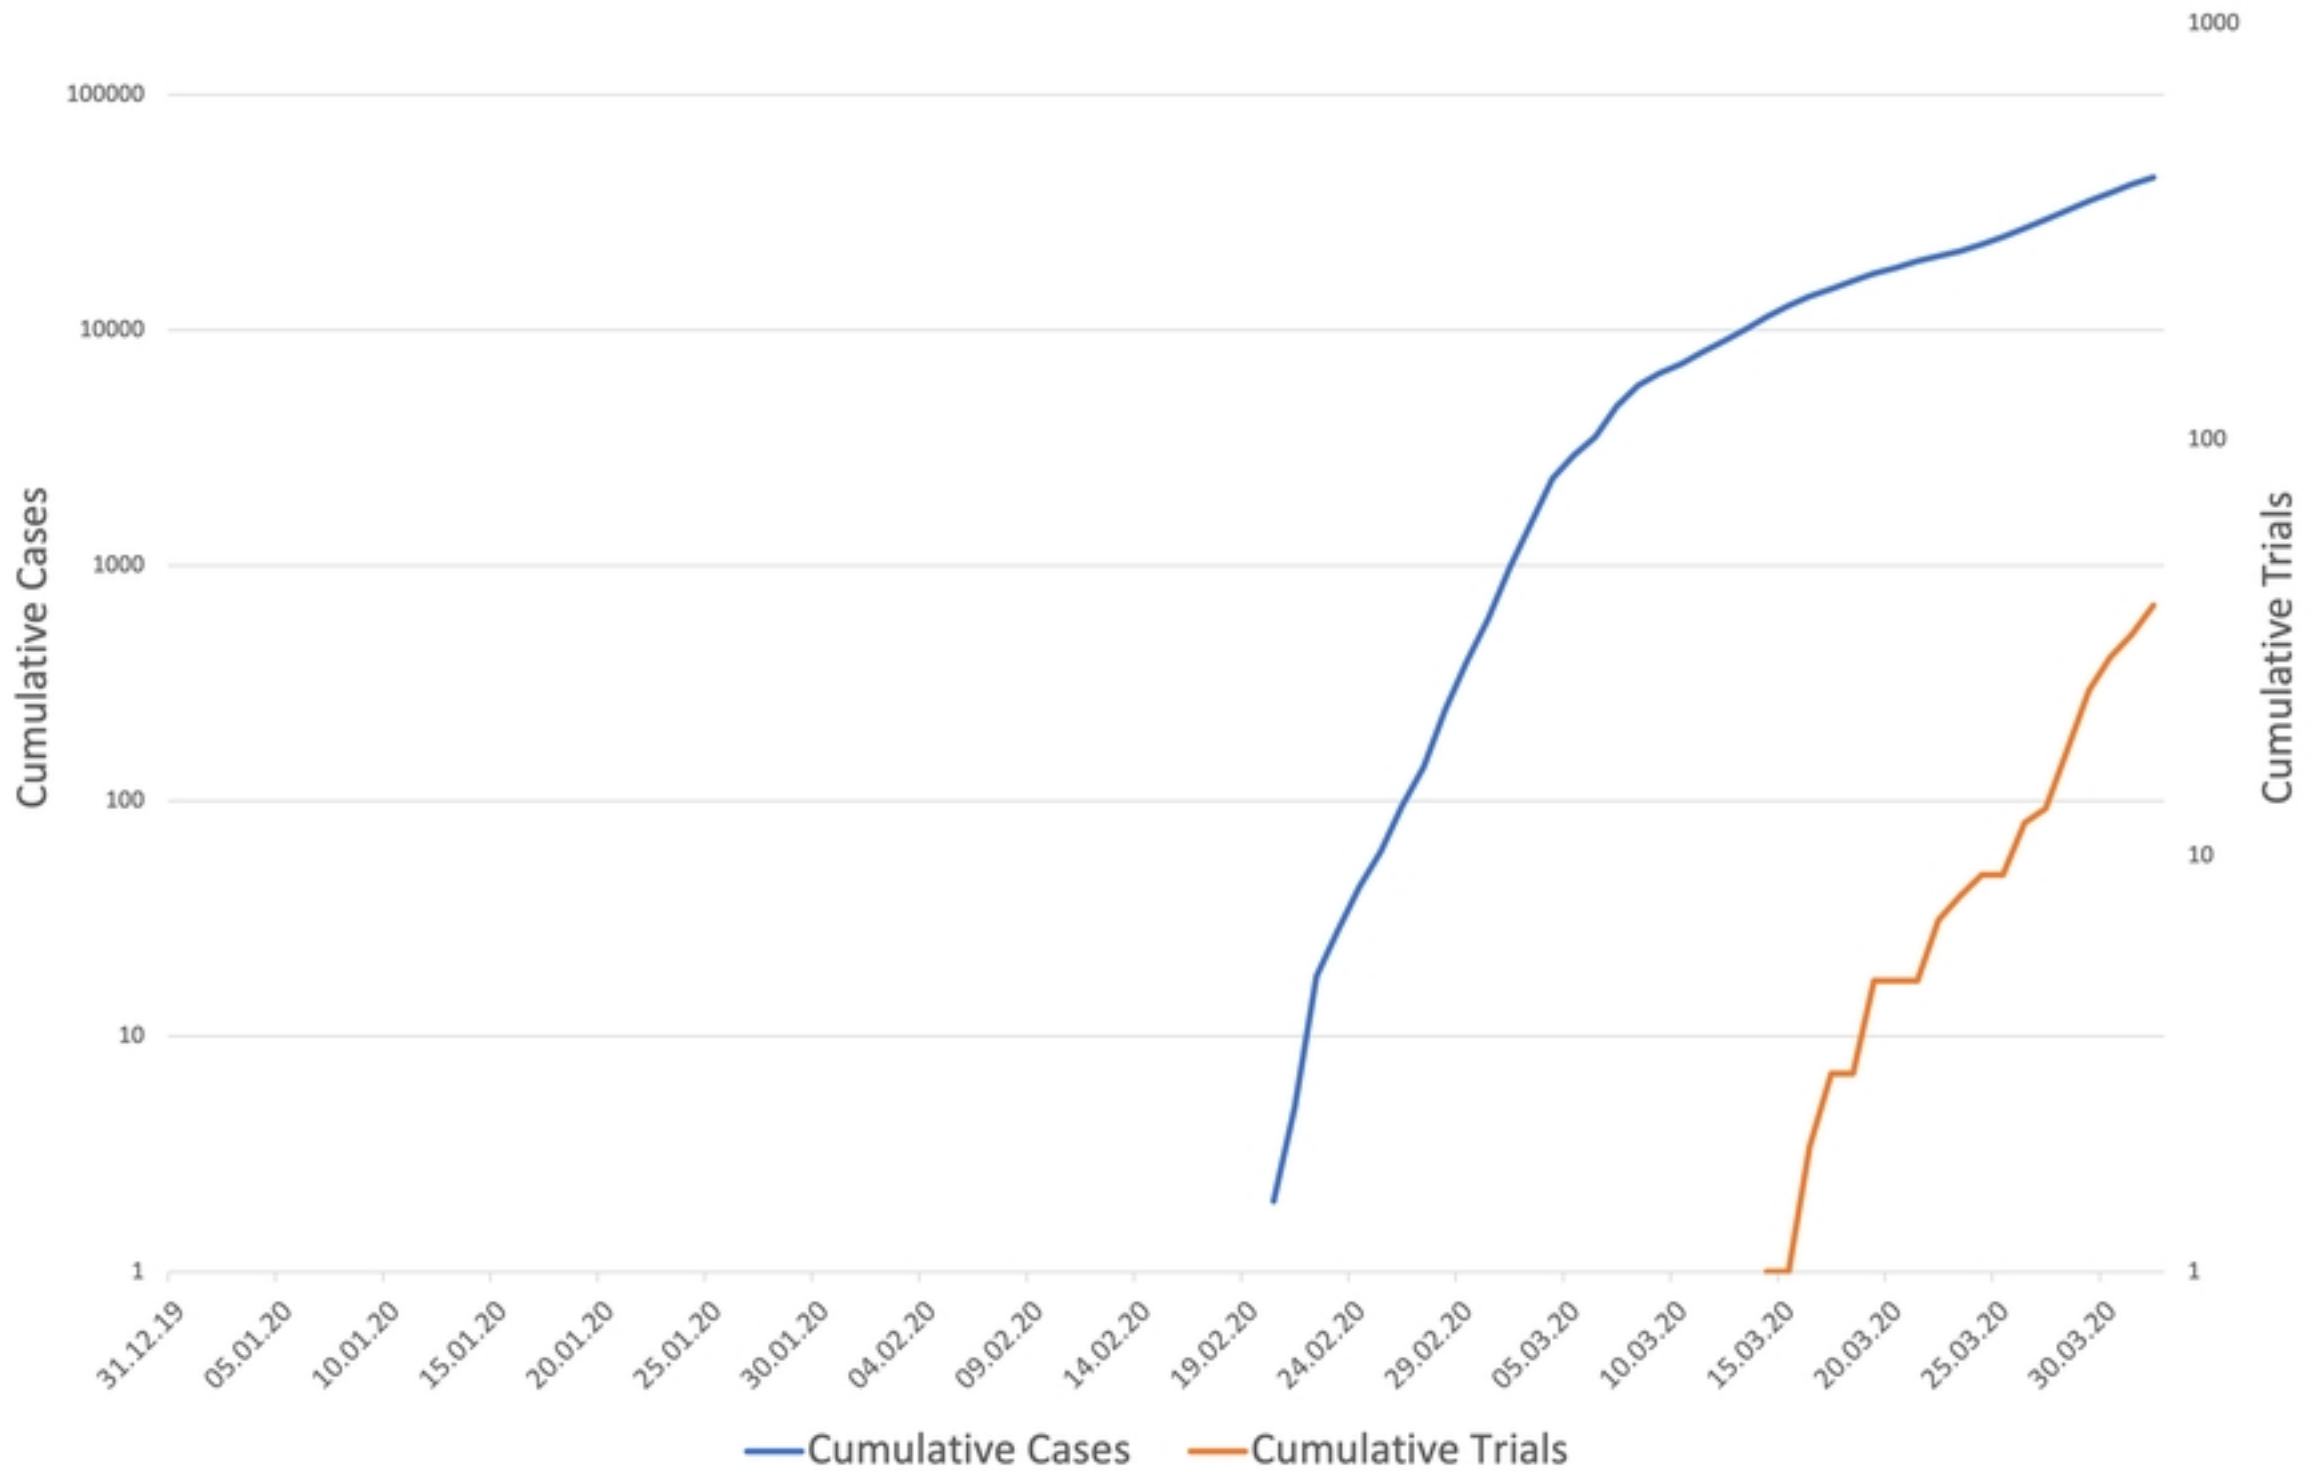

Fig6

# Cumulative Cases vs. Trials Italy

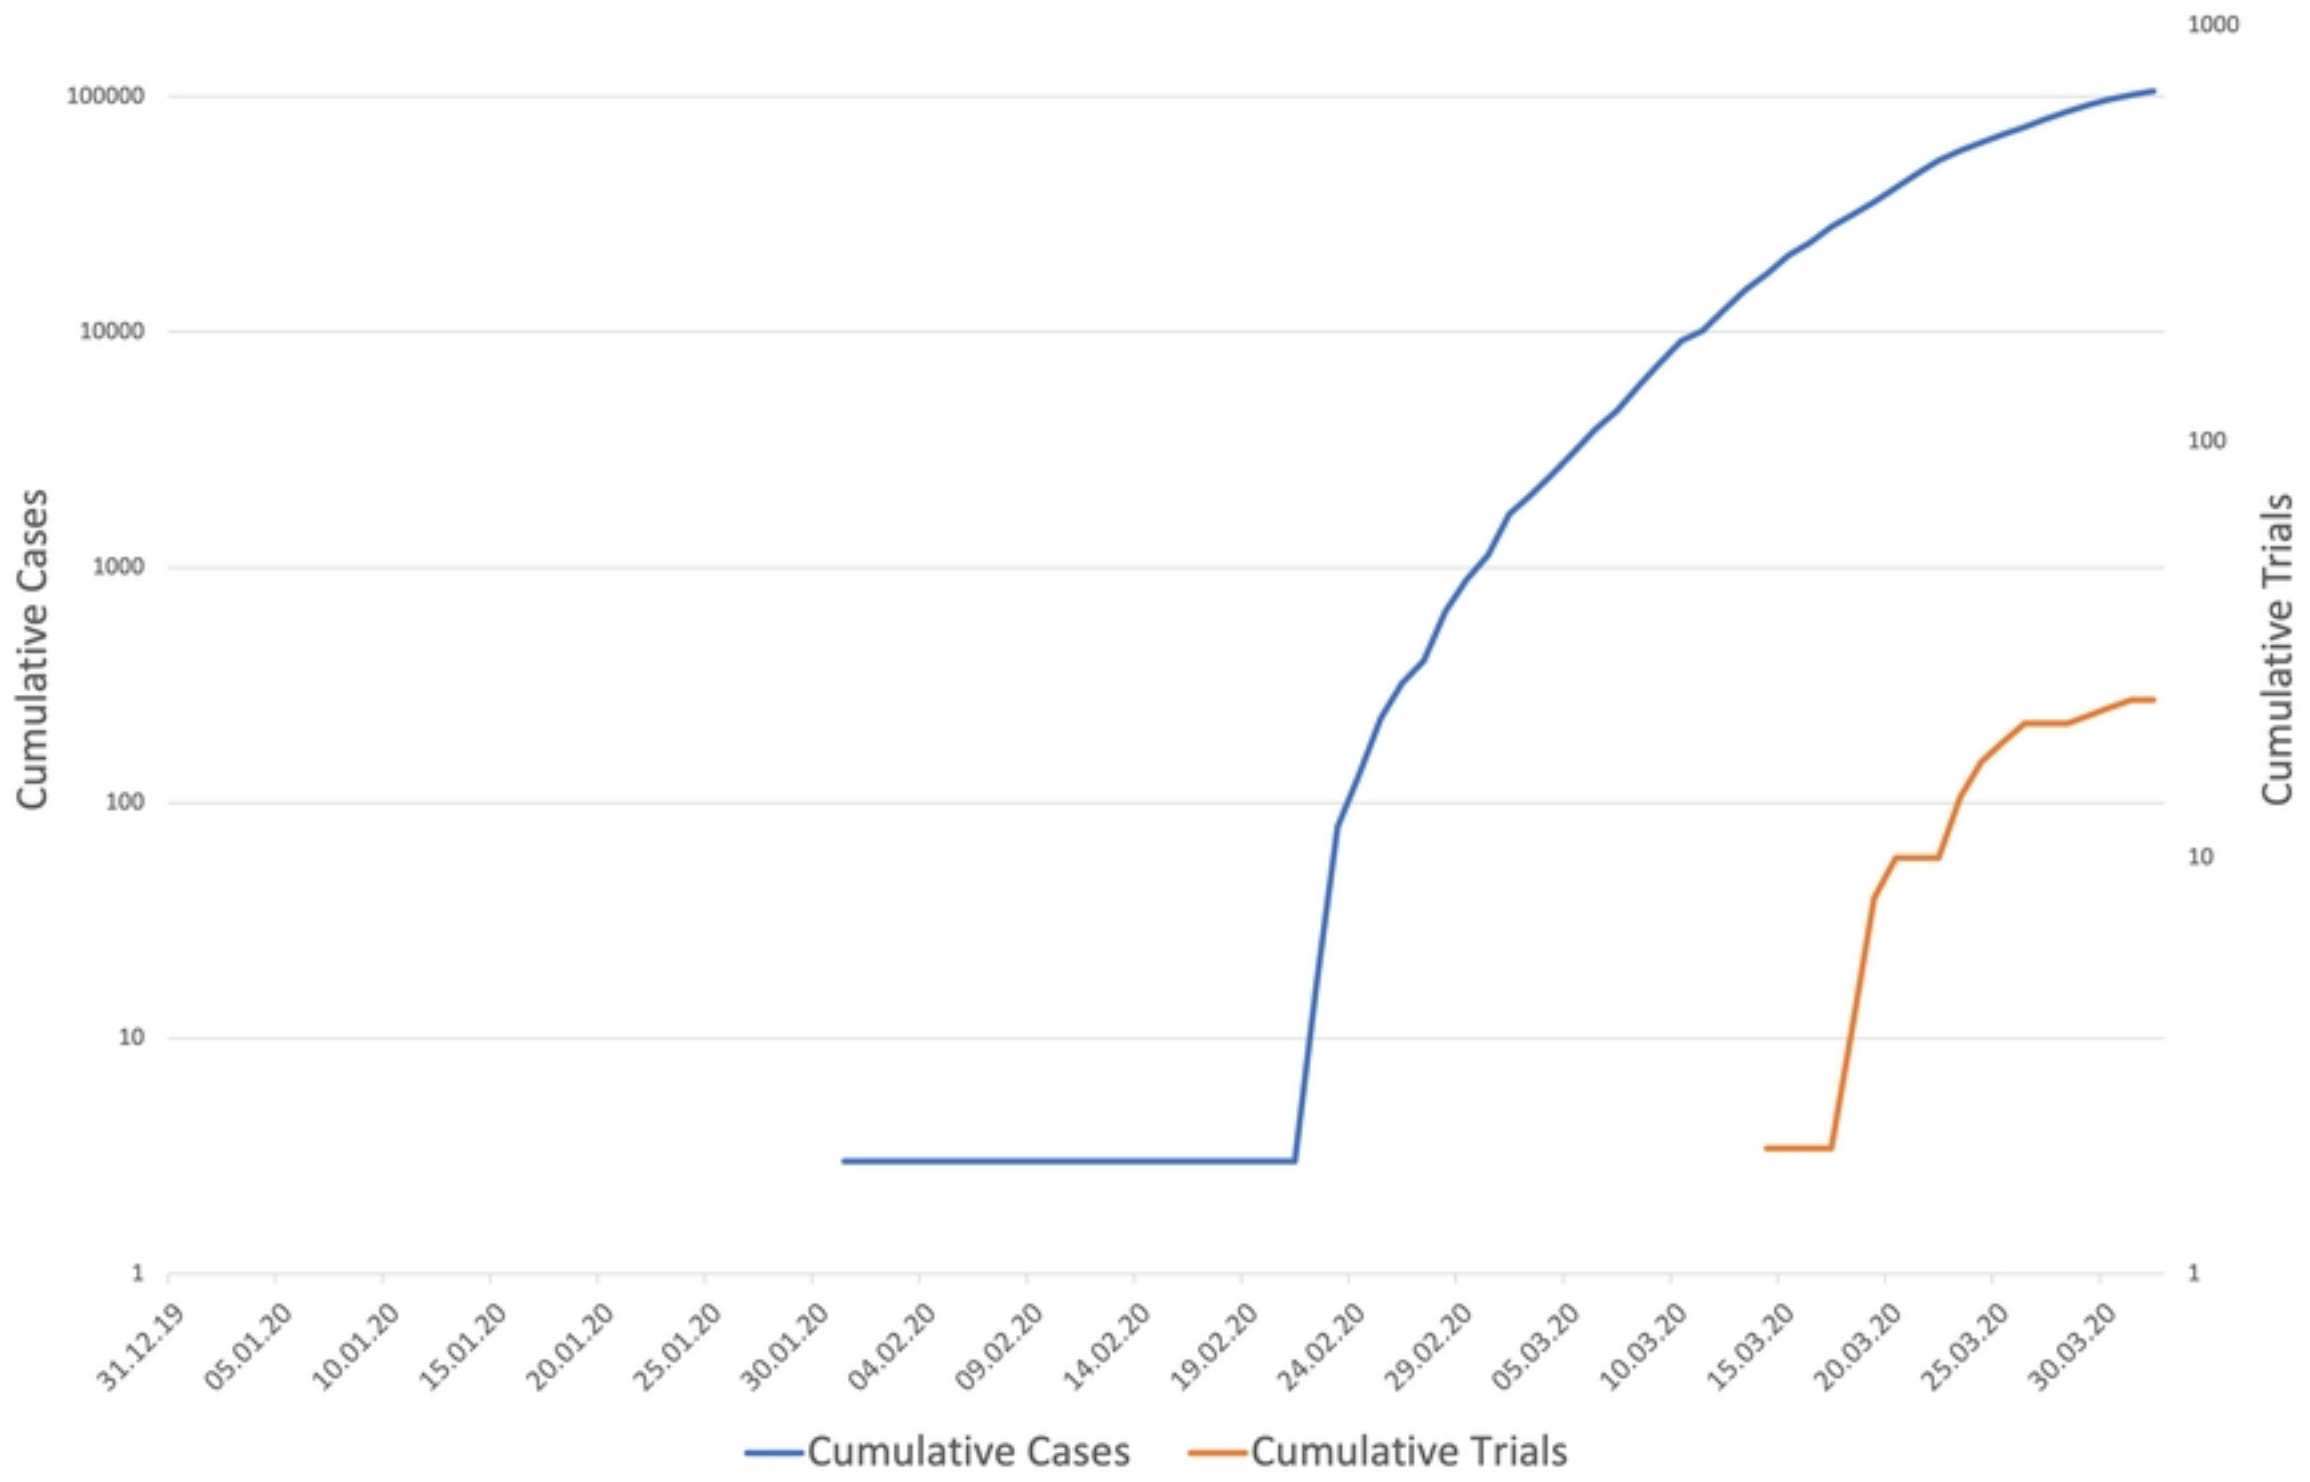

Fig7

# Cumulative Cases vs. Trials Germany

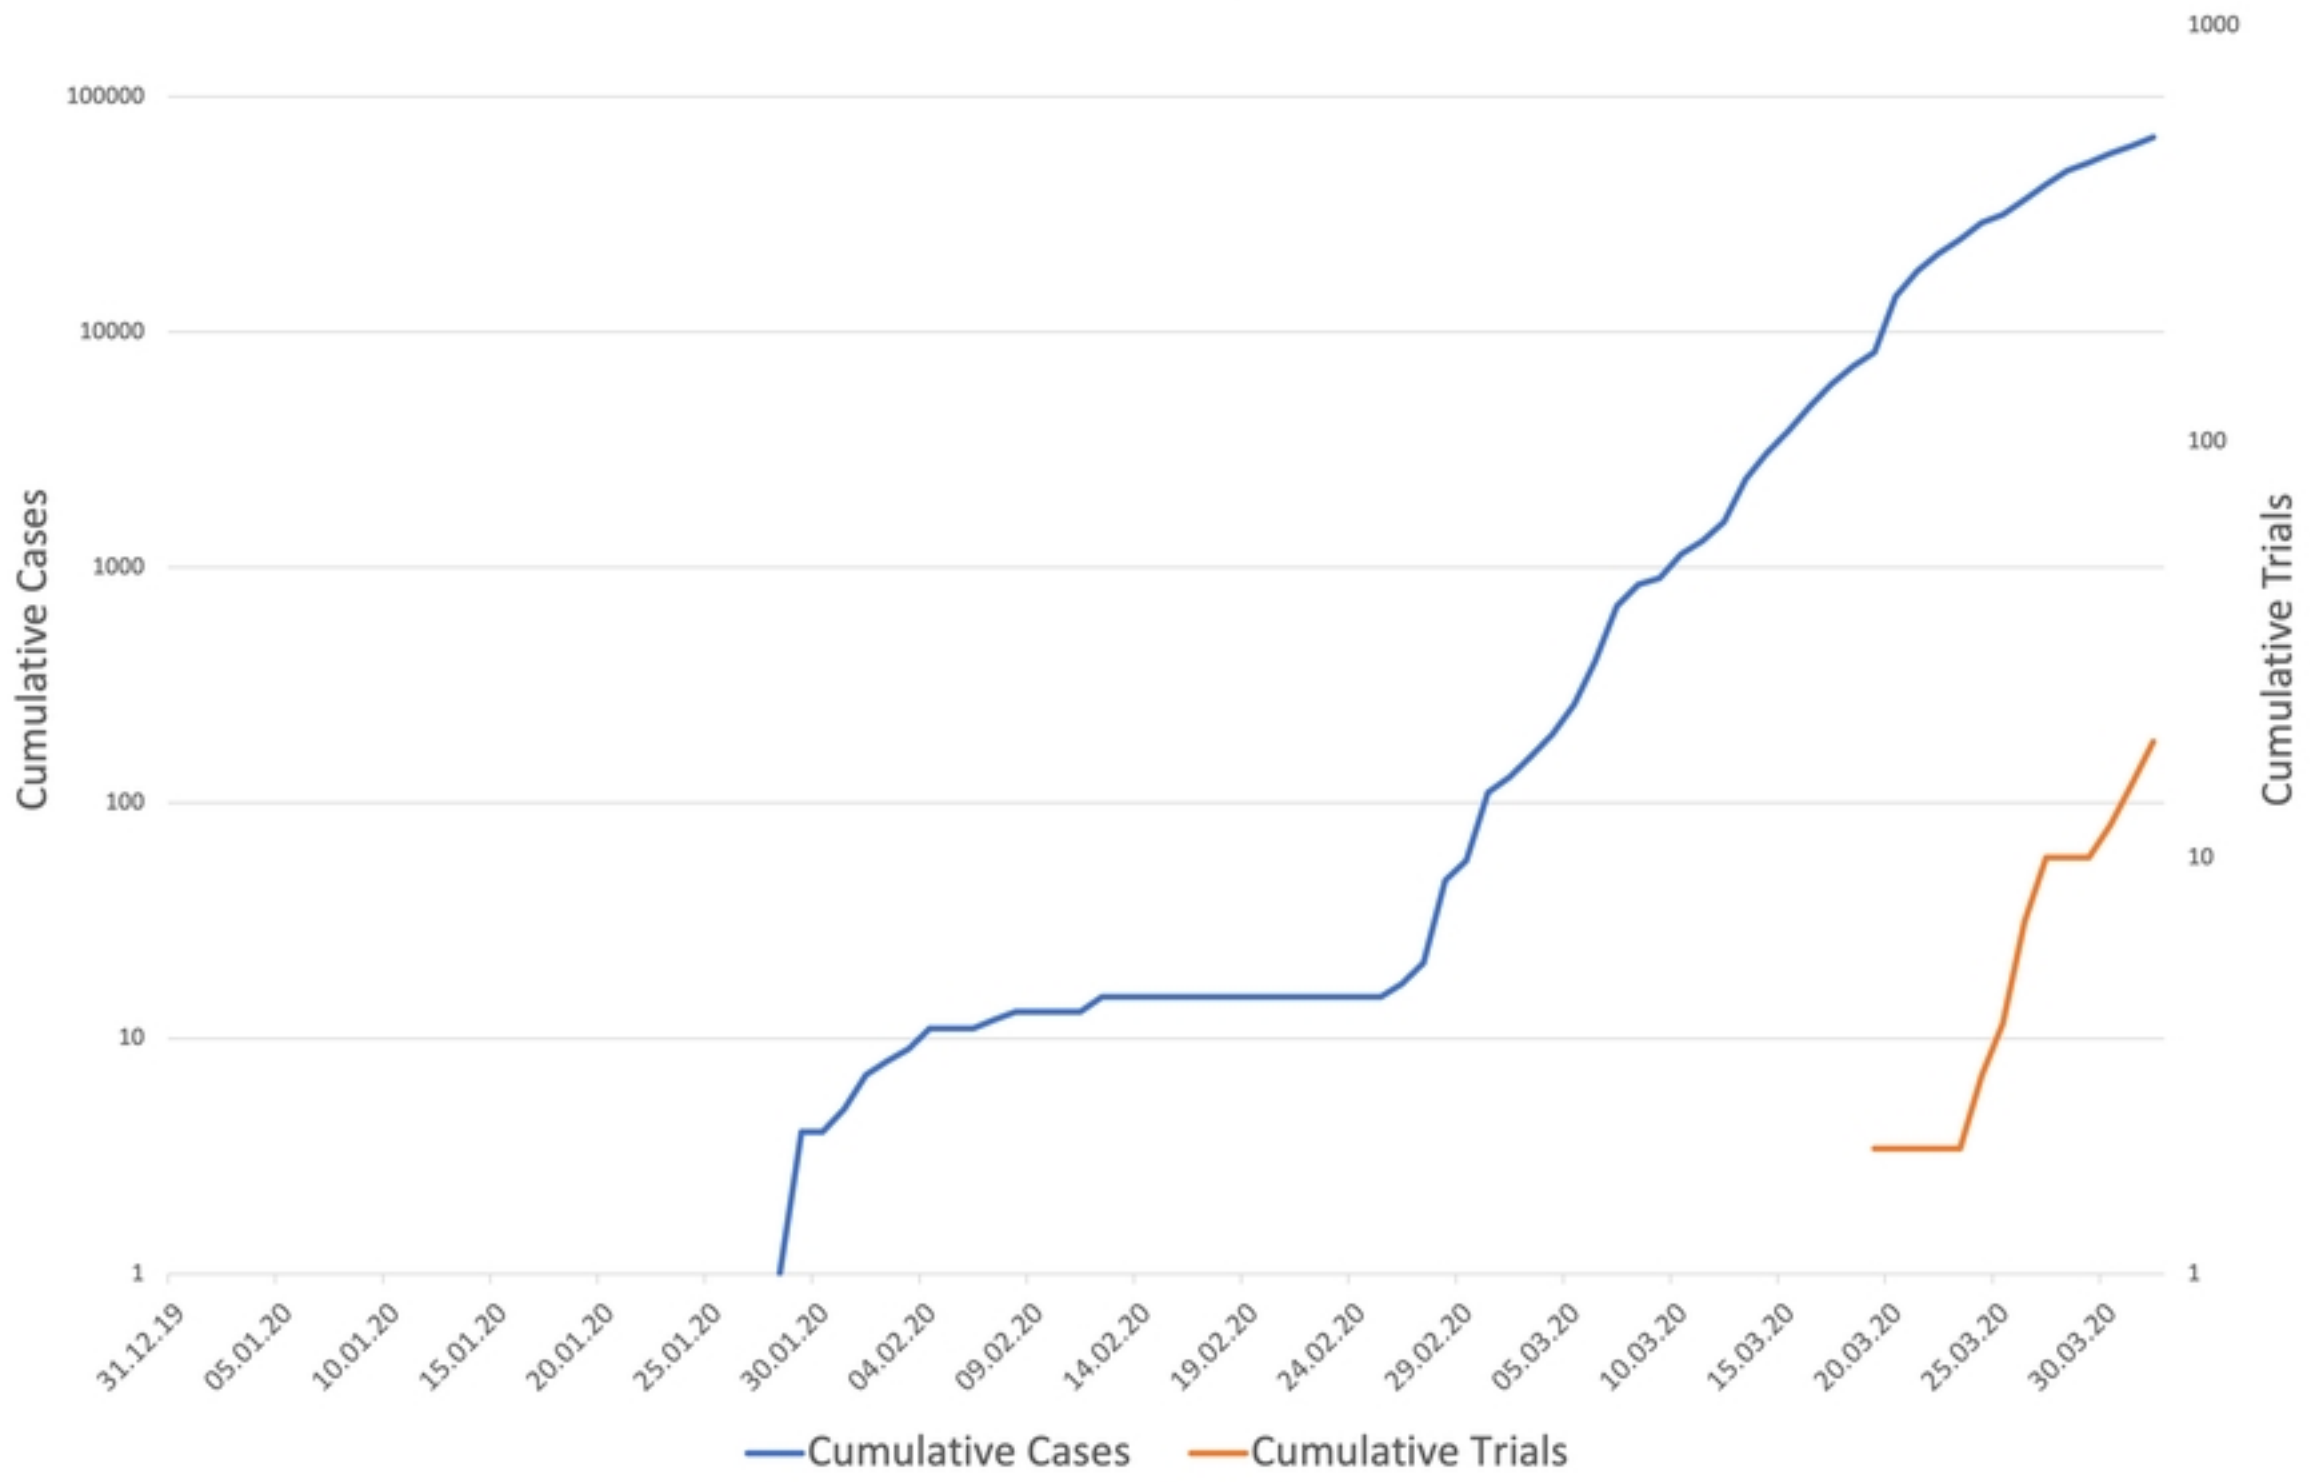

Fig8

# Cumulative Cases vs. Trials UK

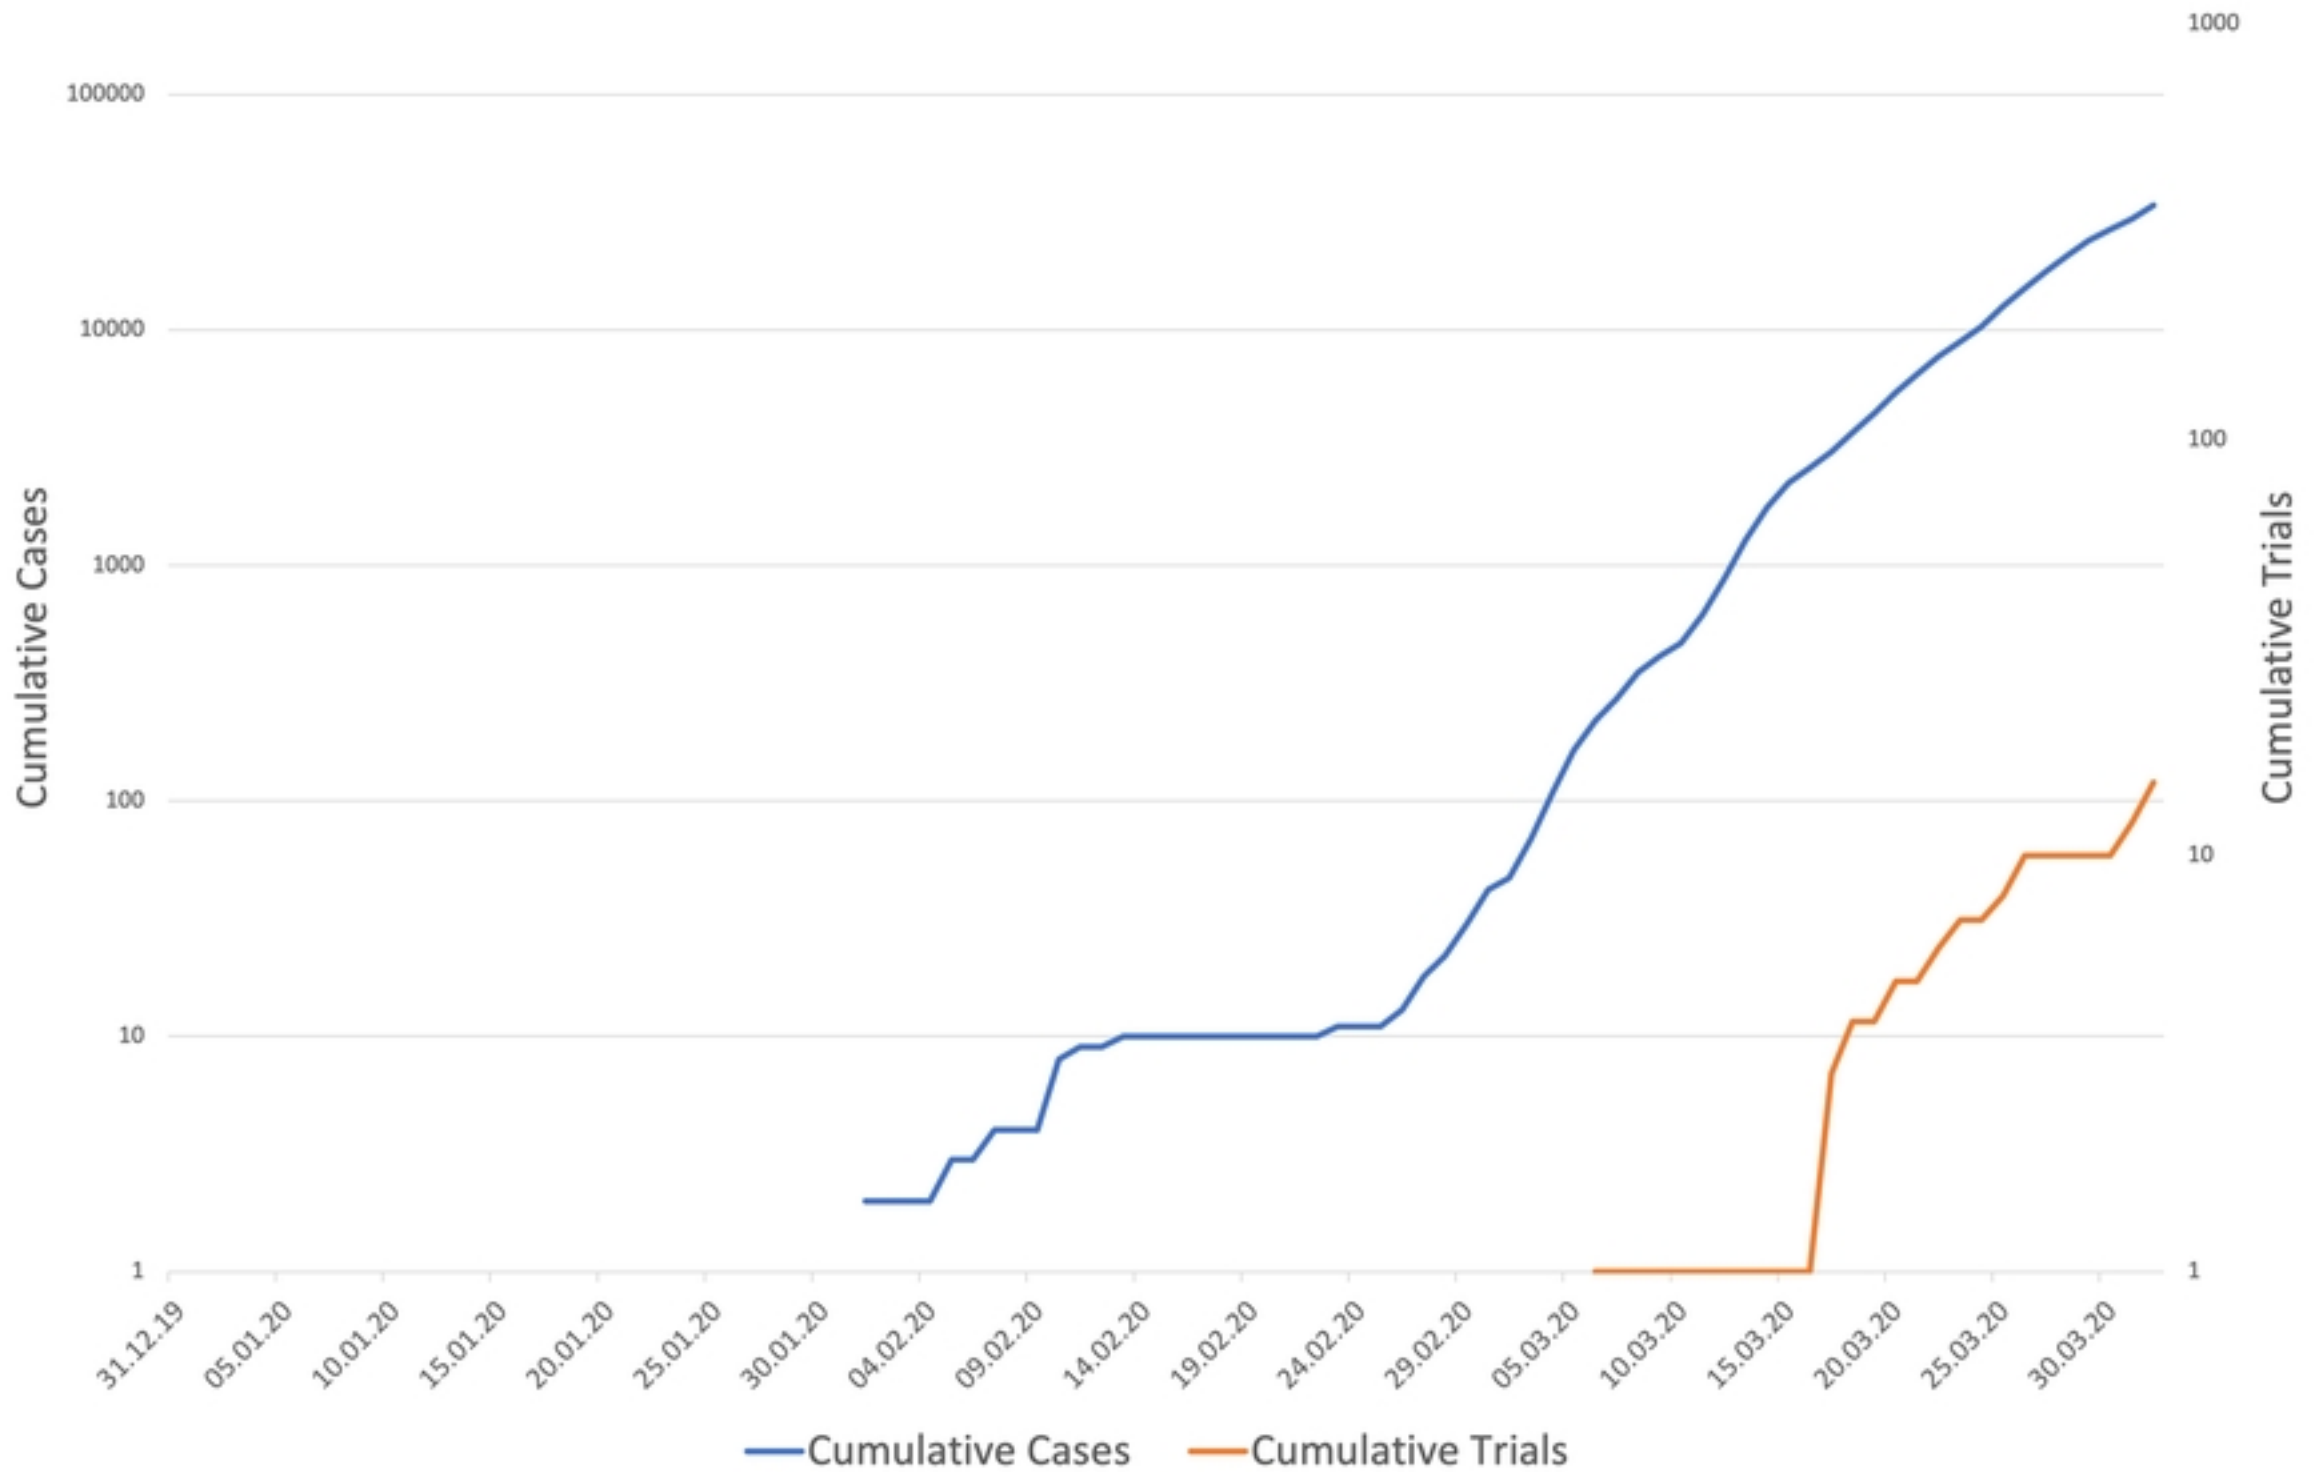

Fig9



# Cumulative Cases vs. Trials Netherlands

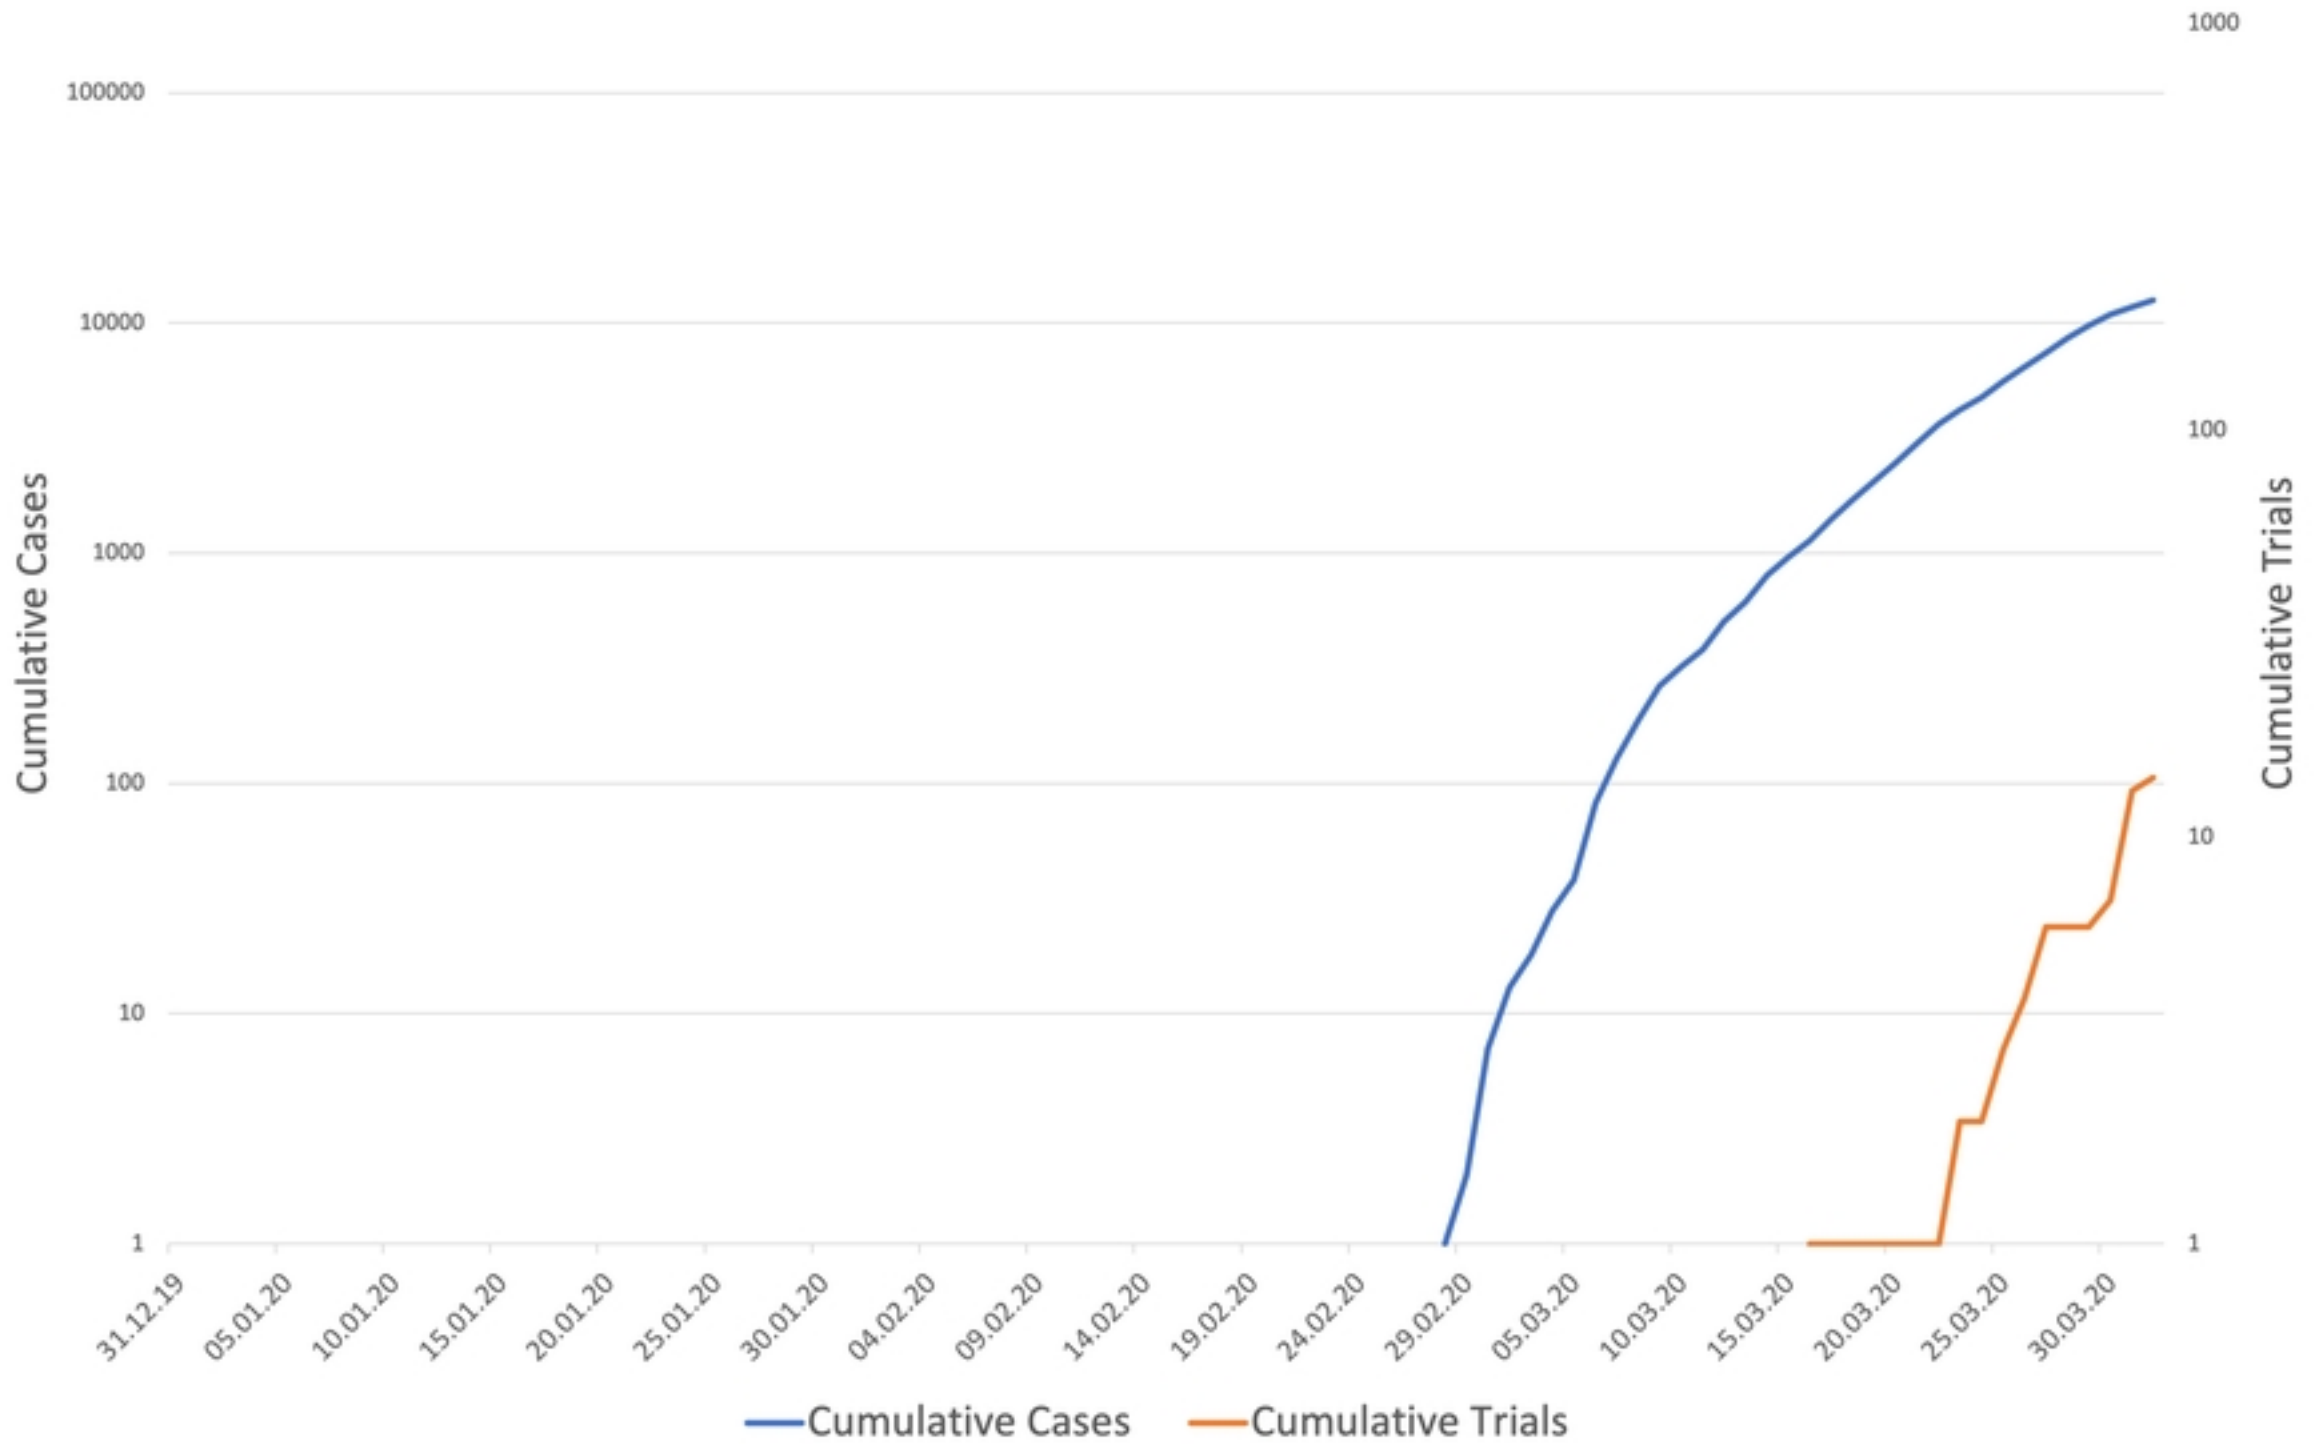

Fig10

# Cumulative Cases vs. Trials Spain

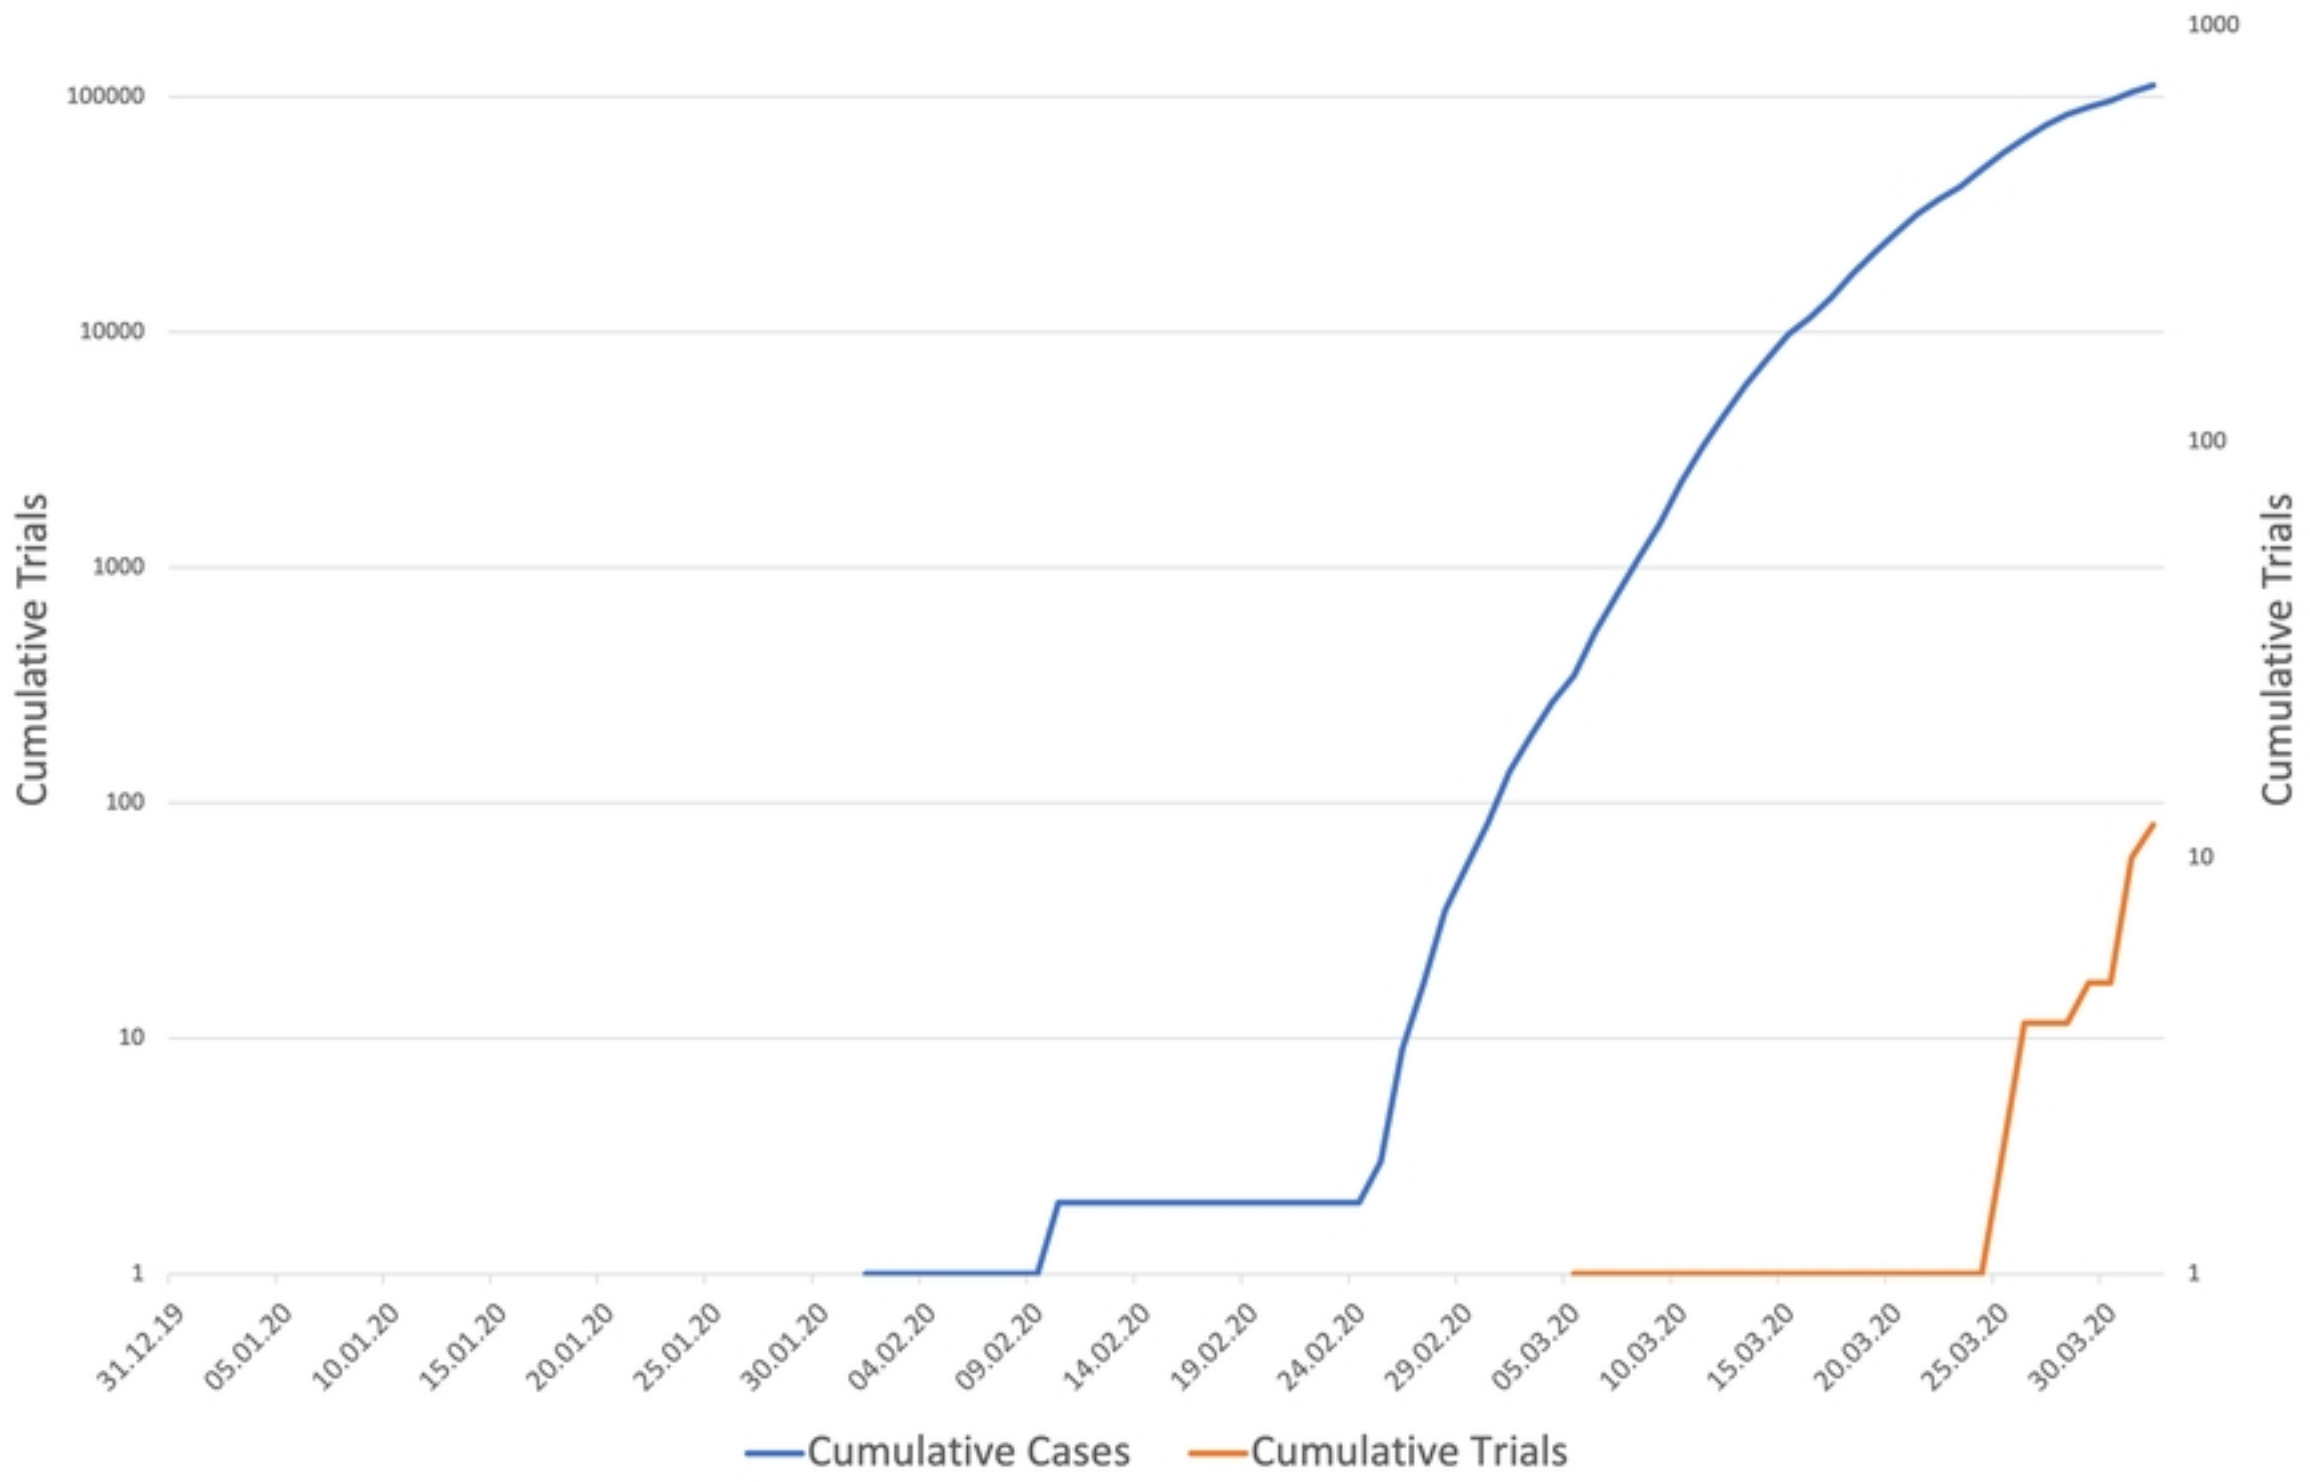

Fig11

# Cumulative Cases vs. Trials Canada

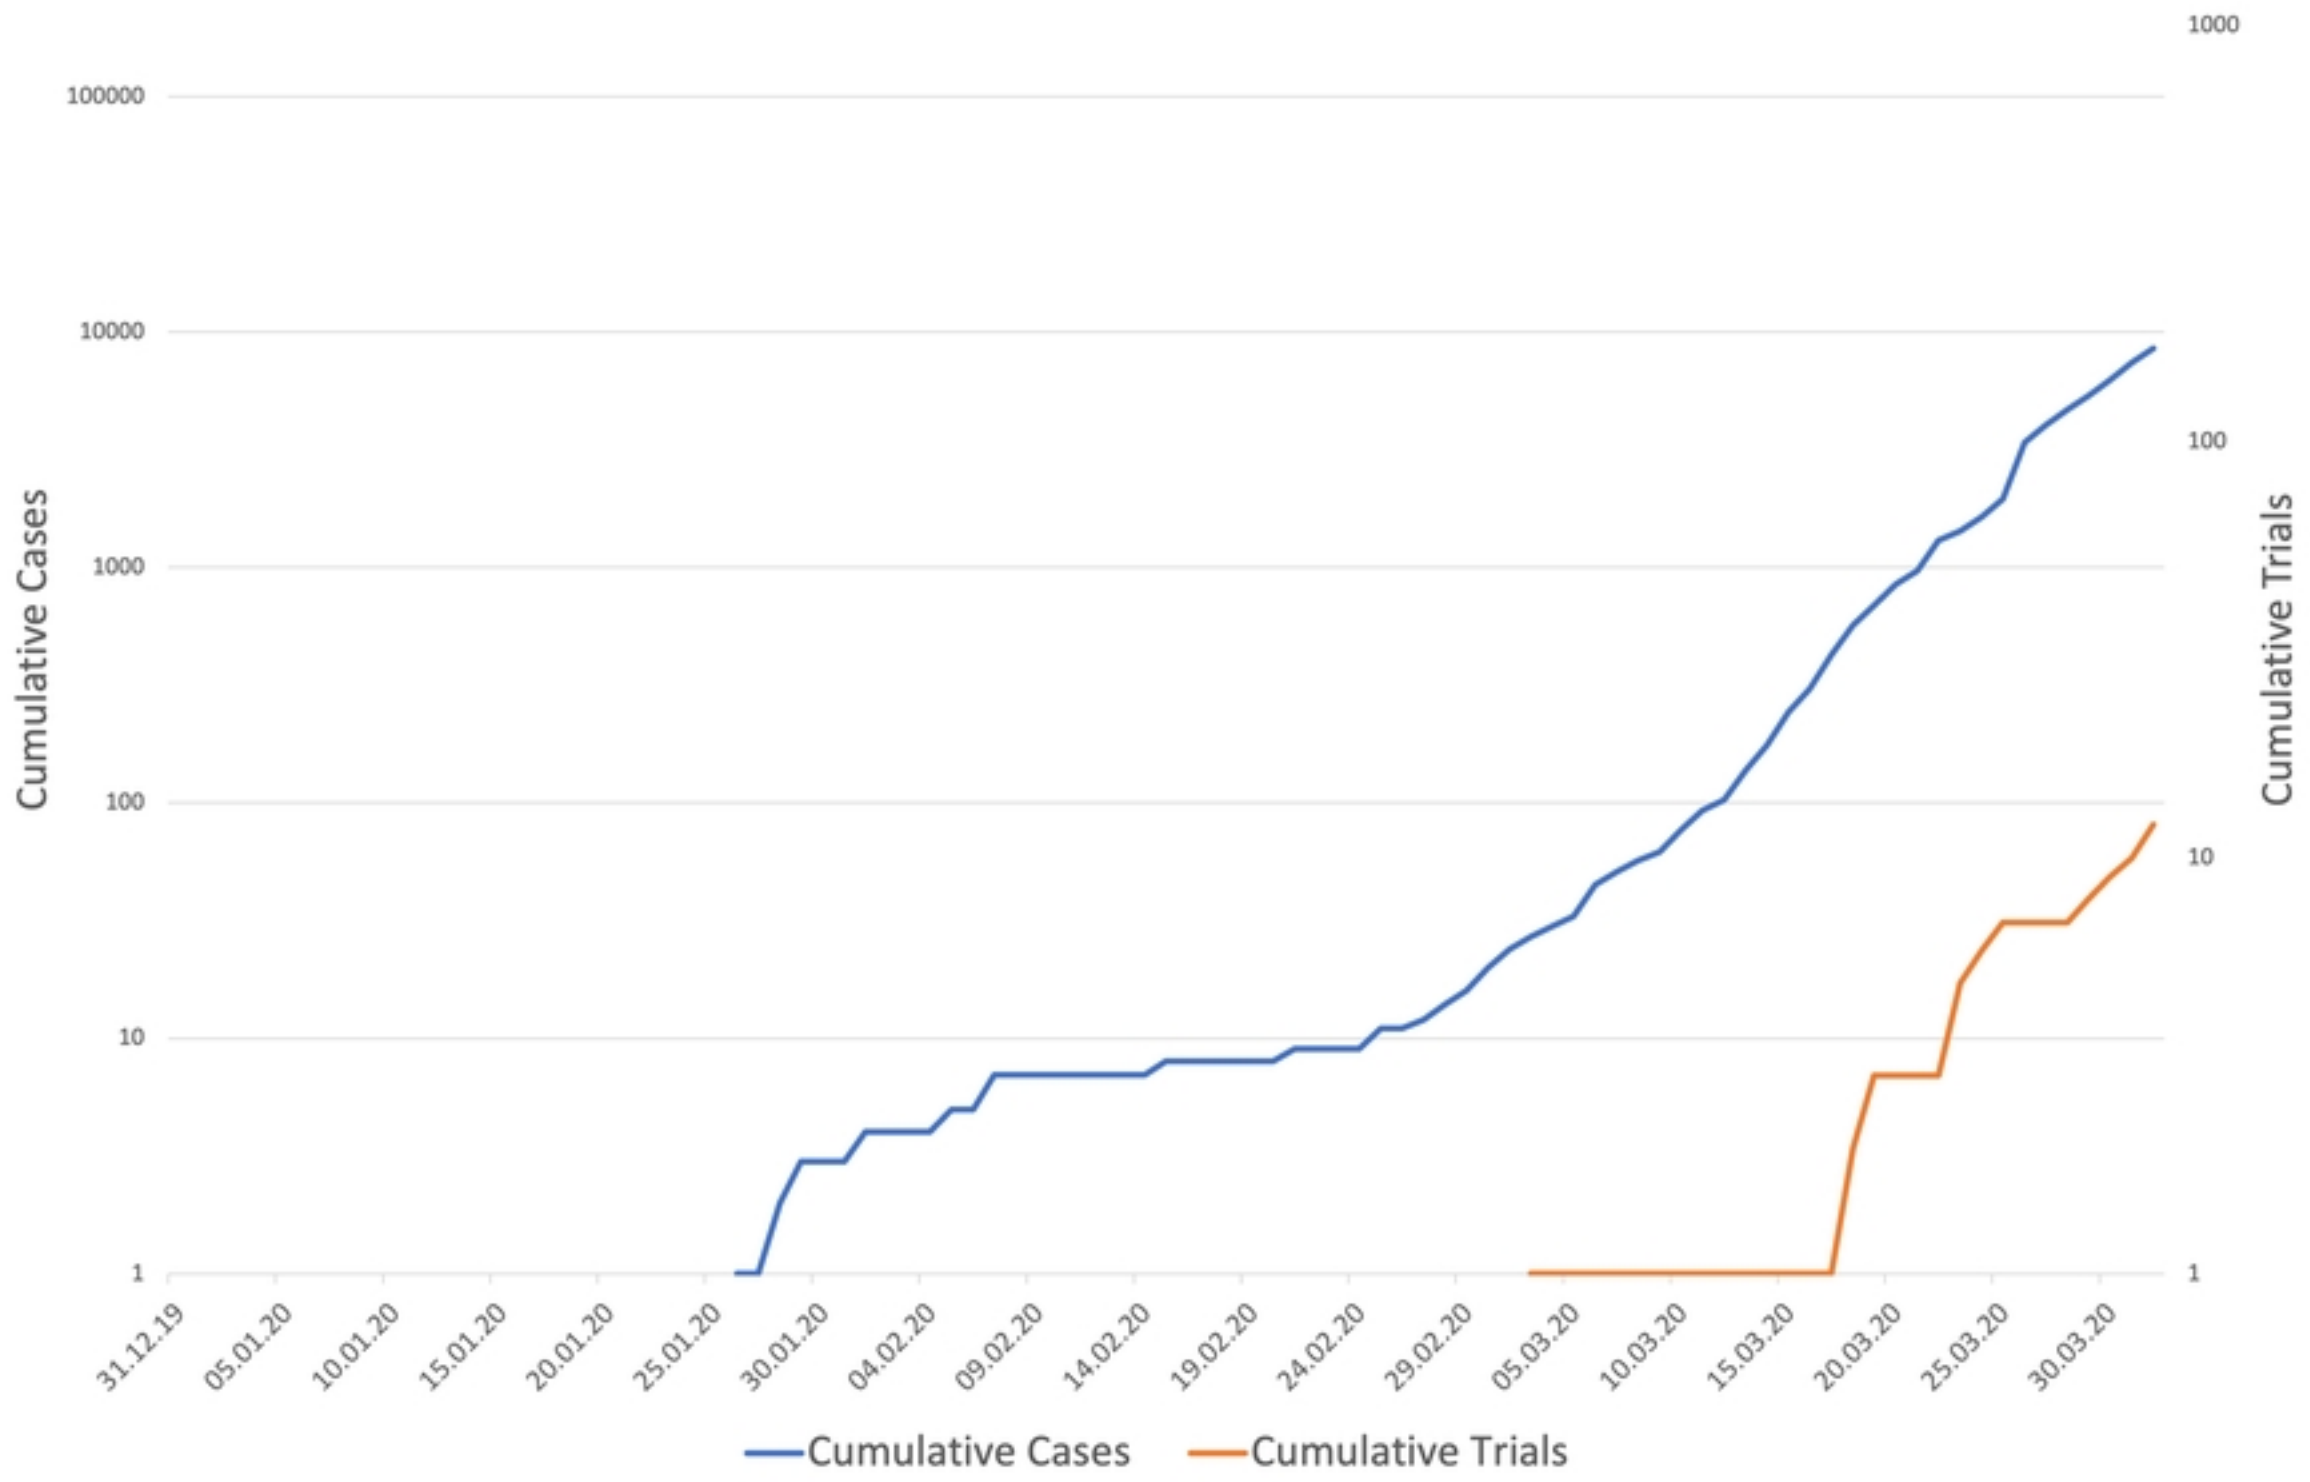

Fig12

# Cumulative Cases vs. Trials Japan

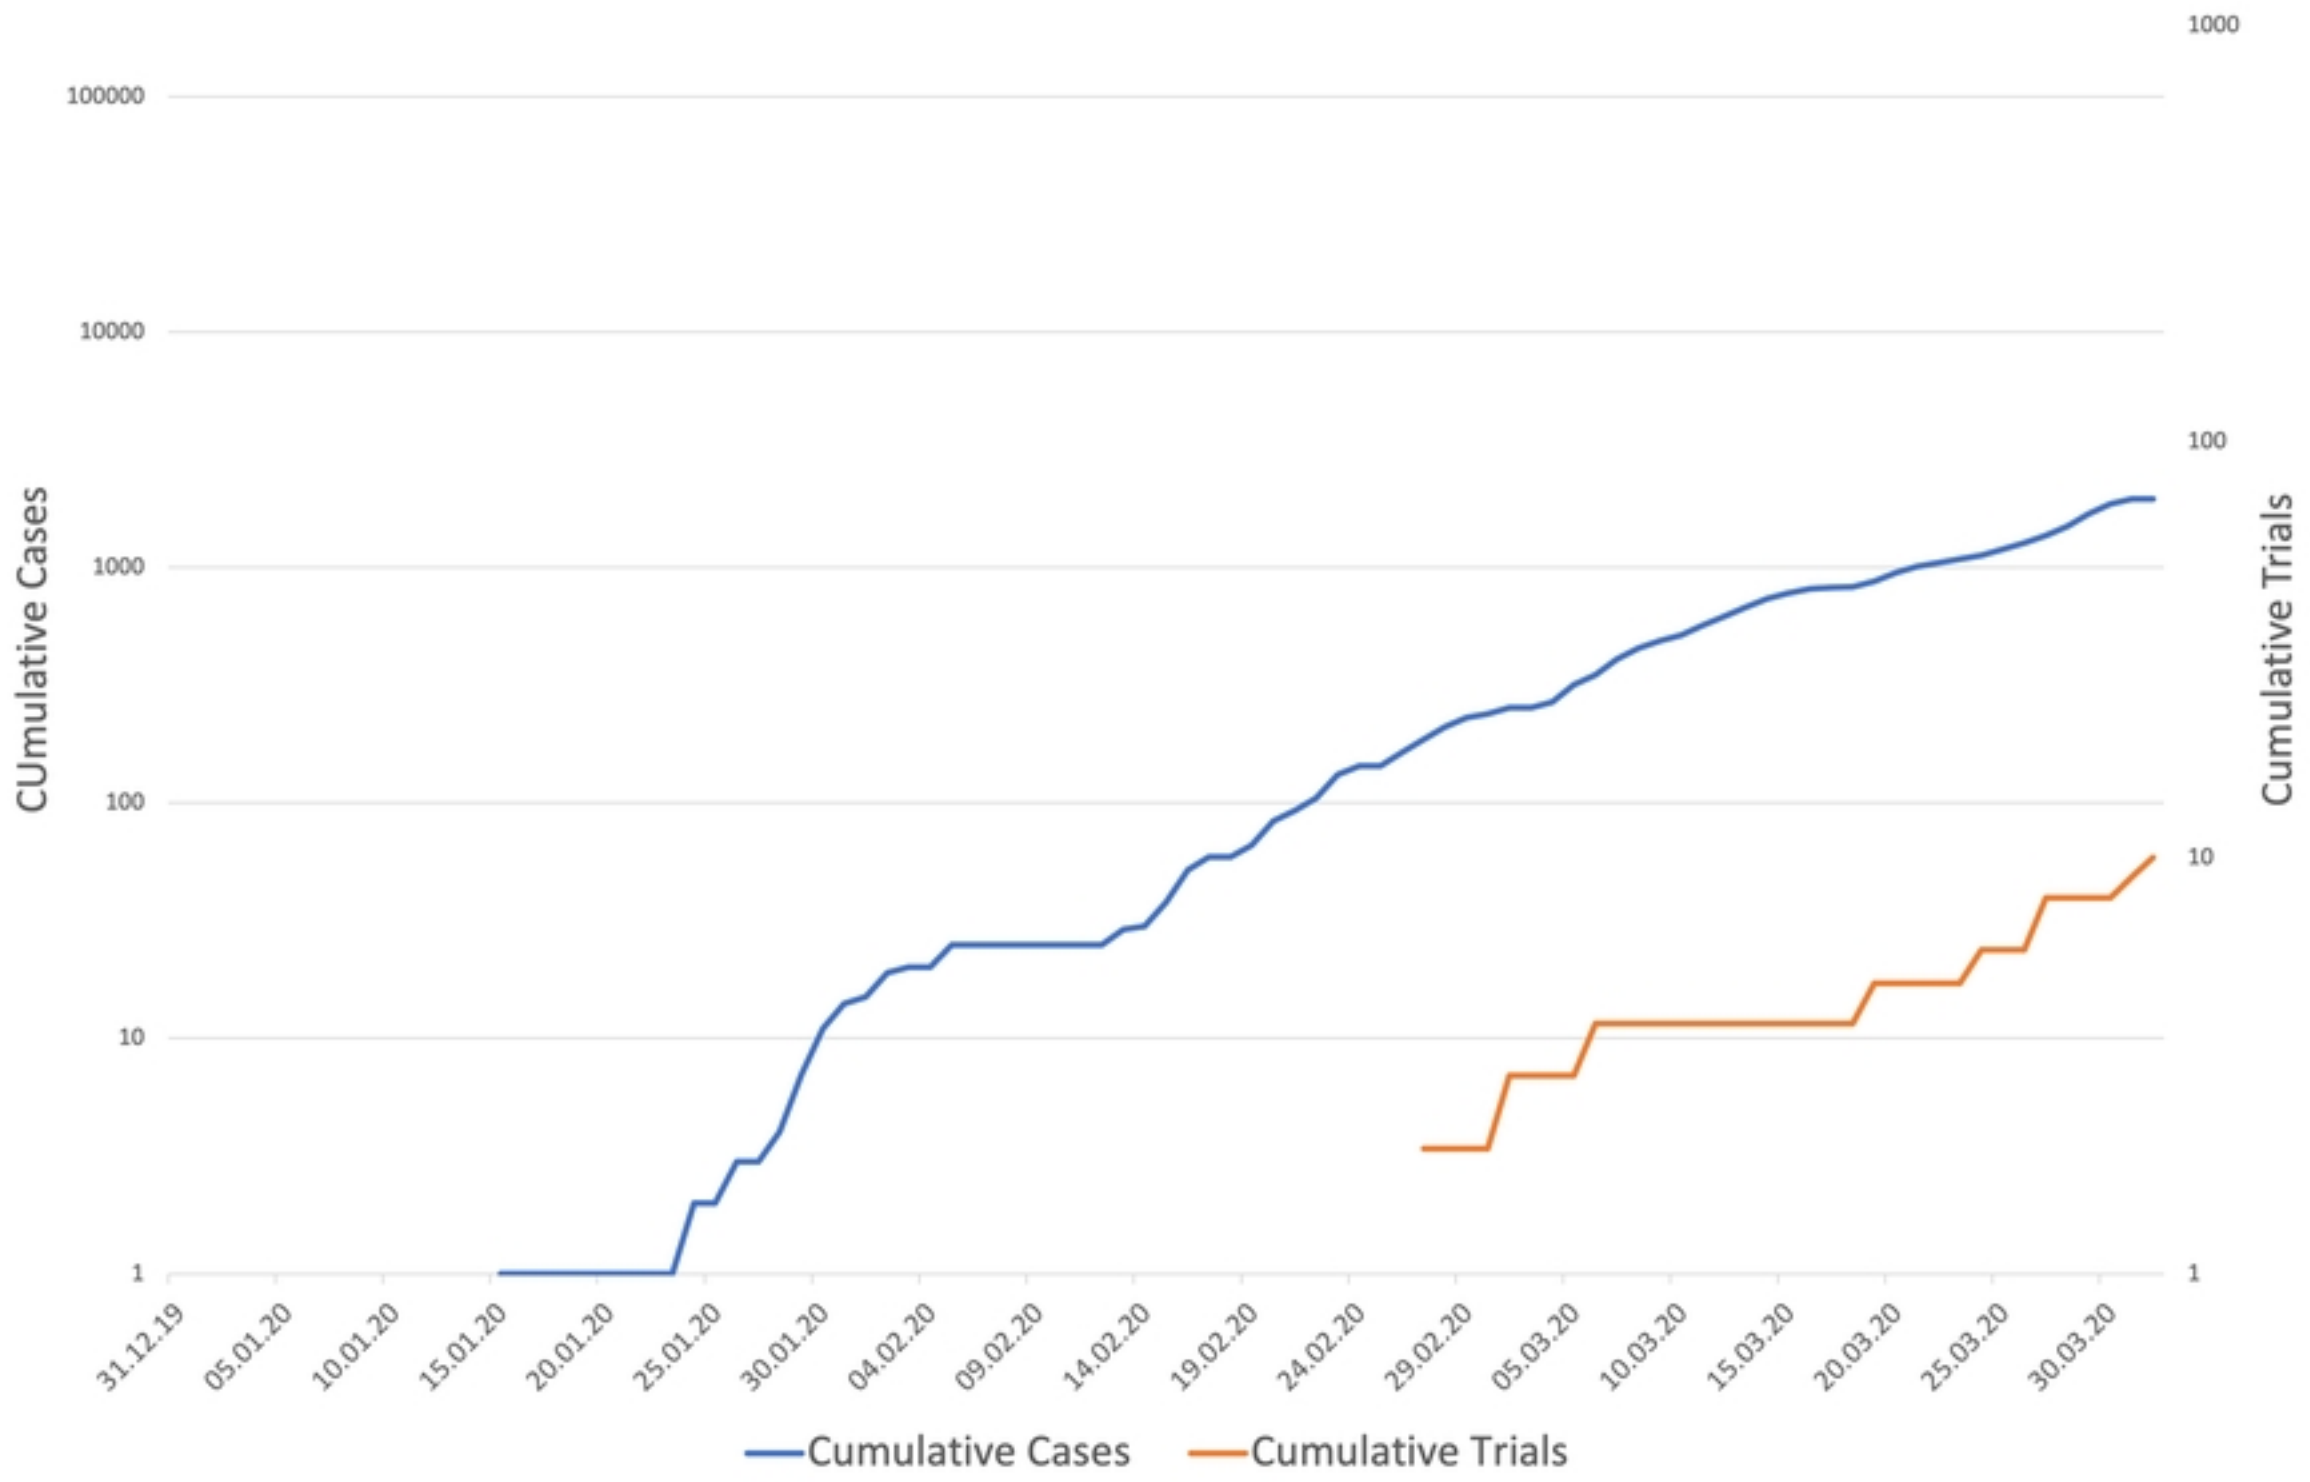

Fig13

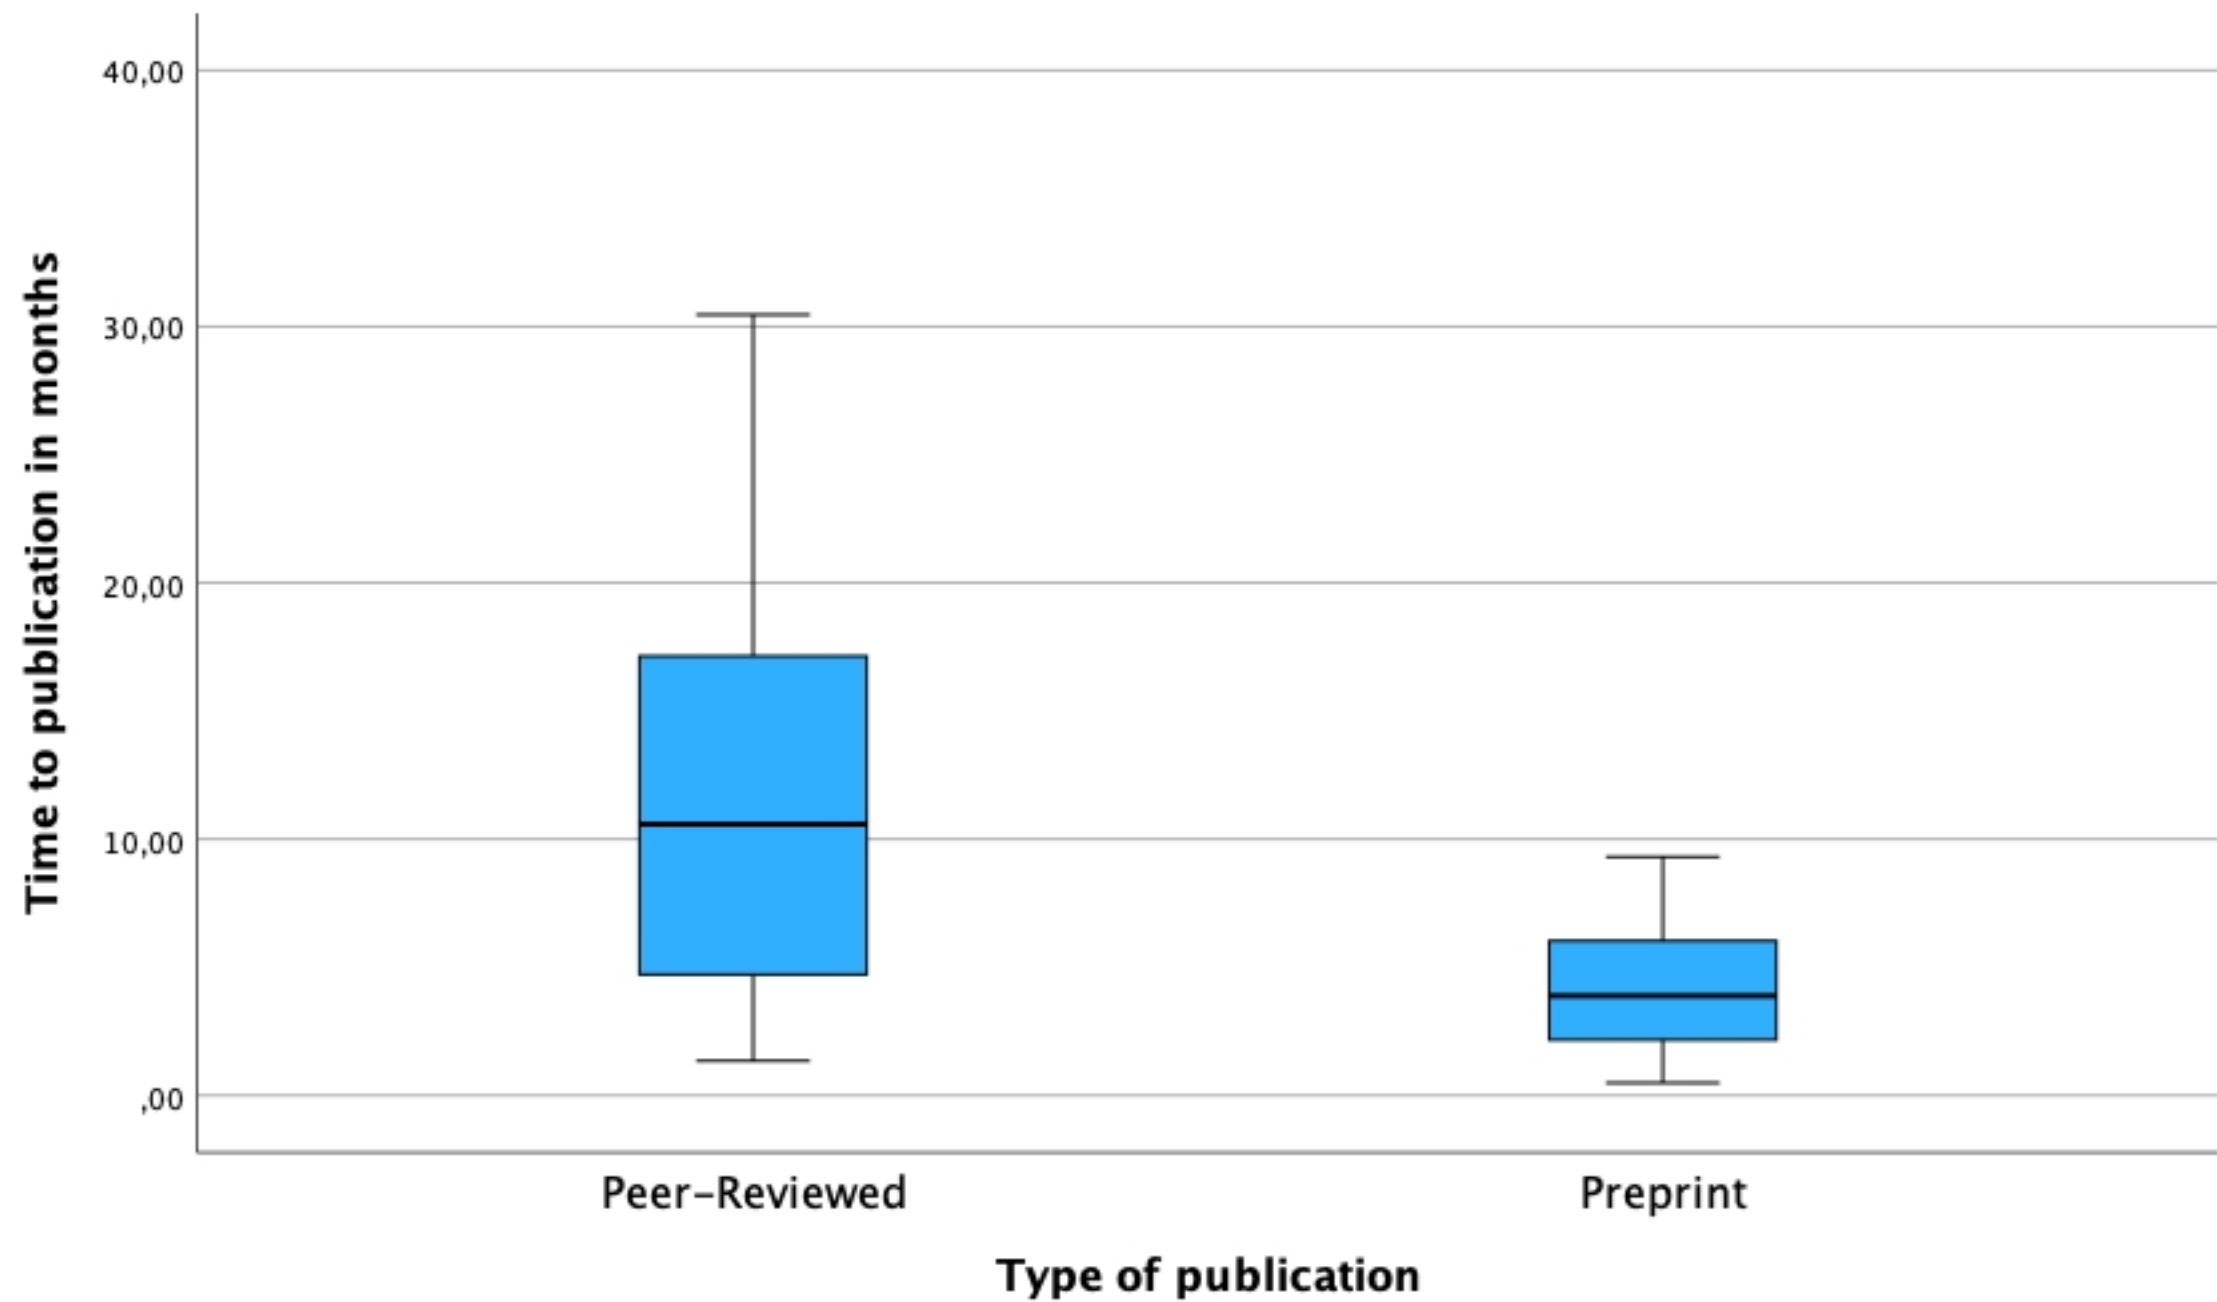

Fig14

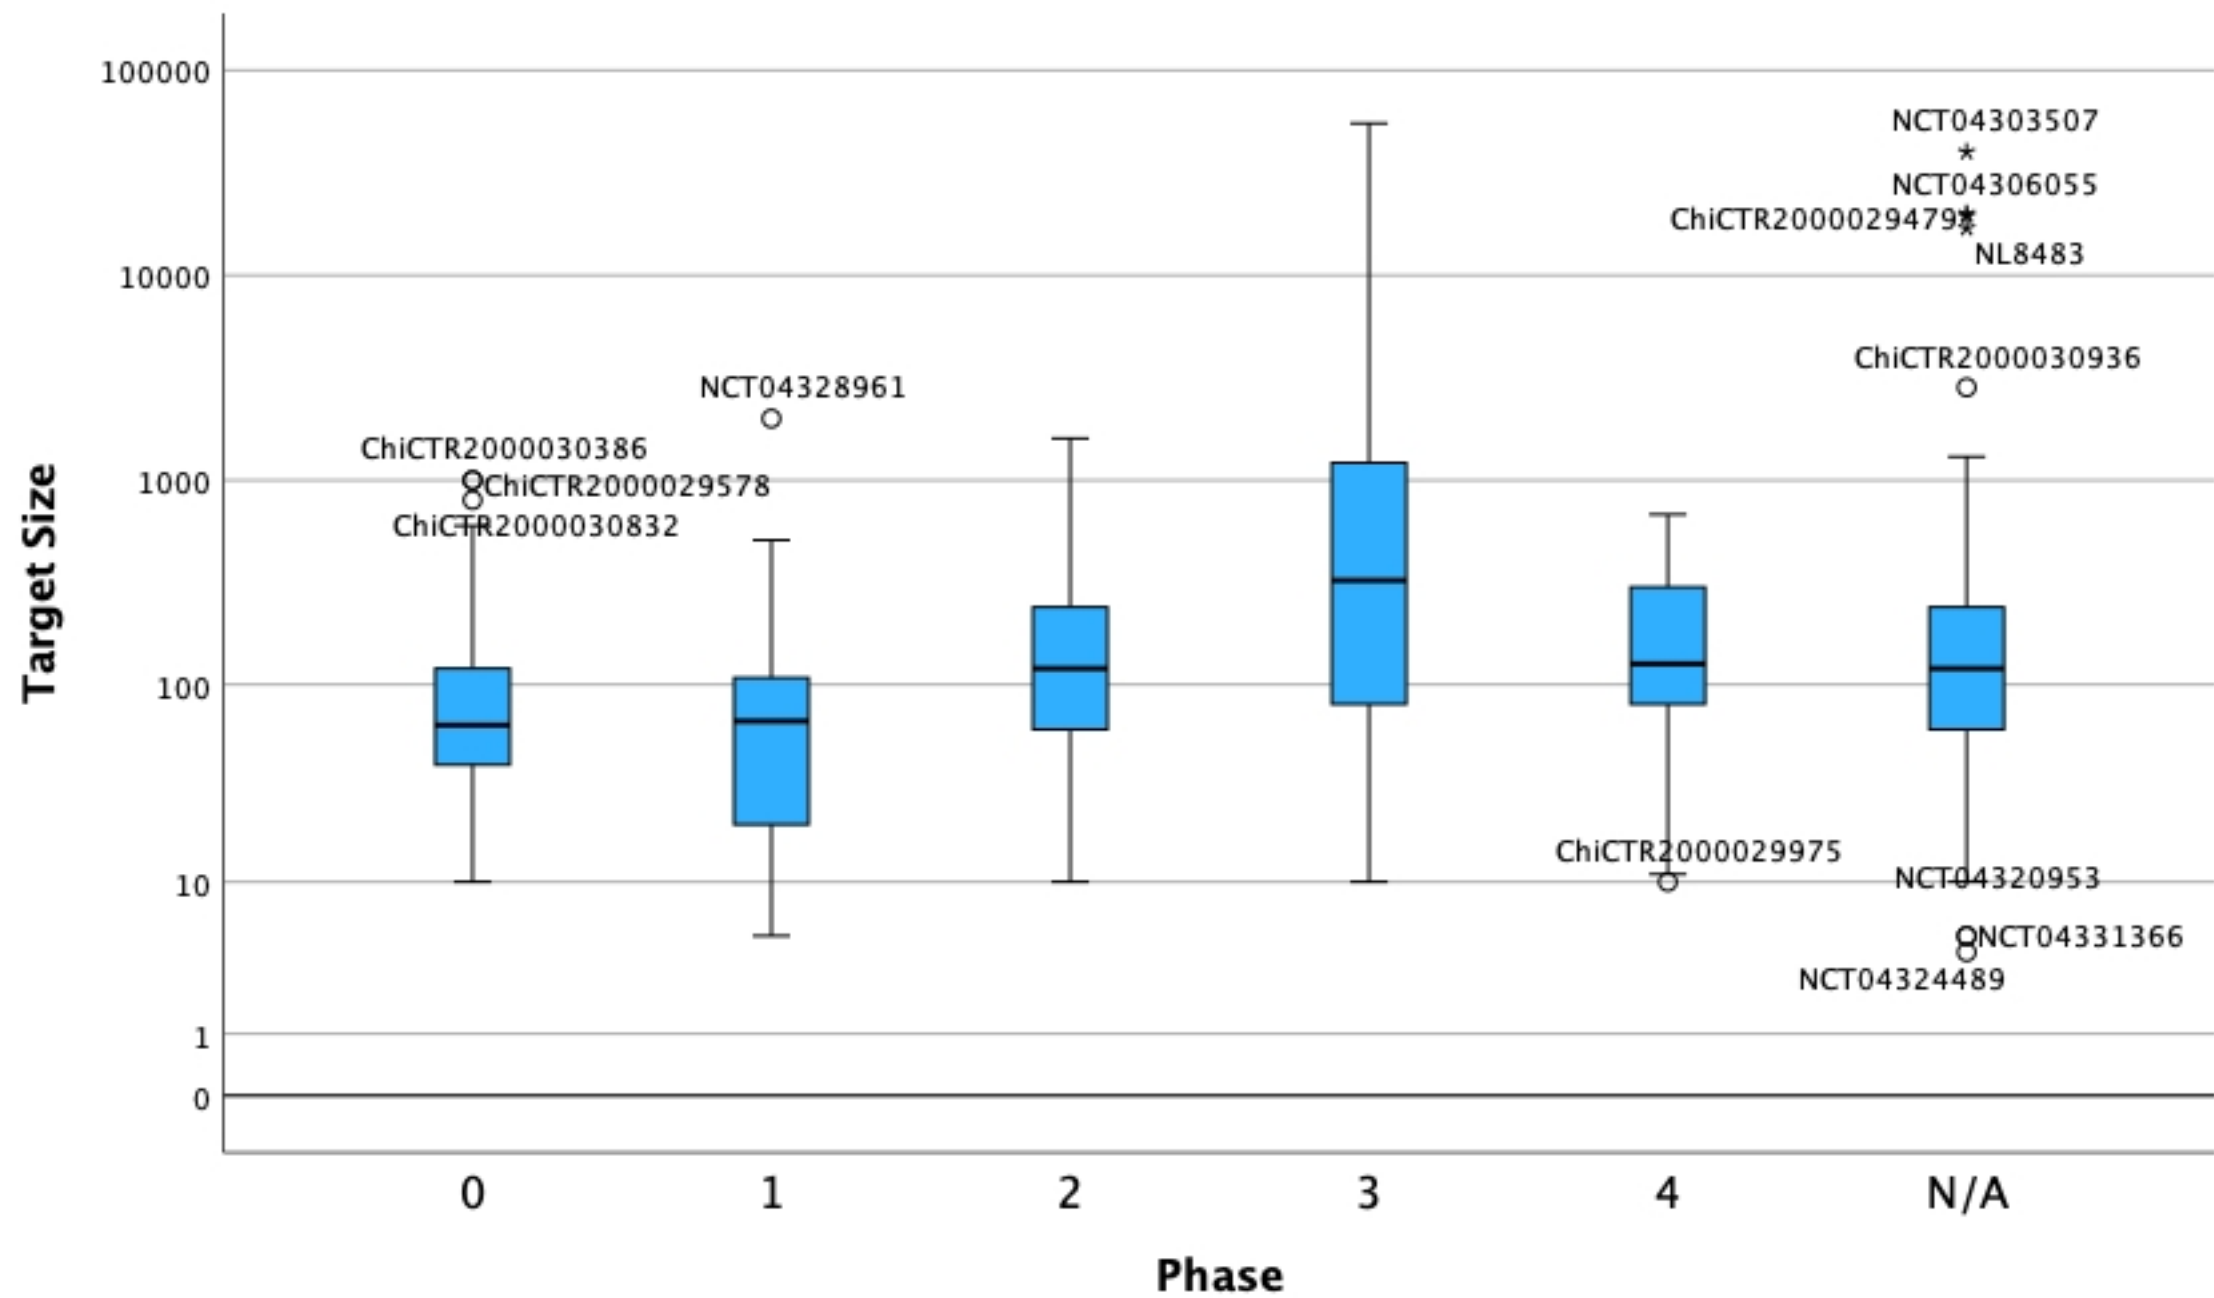

Fig15
